# Supplementary material for: Enantioselective alkynylation of benzo[e][1,2,3]-oxathiazine 2,2-dioxides catalysed by (R)-VAPOL-Zn complexes: synthesis of chiral propargylic cyclic sulfamidates
Source: Royal Society of Chemistry journal article supplement (doi:10.1039/c5ob01012h), 2015-01-01
Supplement: c5ob01012h1.pdf [file c5ob01012h1.pdf]

## Enantioselective alkynylation of benzo[e][1,2,3]-oxathiazine 2,2-dioxides by (R)-VAPOL-Zn complexes: Synthesis of chiral propargylic cyclic sulfamidates

Lode De Munck<sup>a</sup>, Alicia Monleón<sup>a</sup>, Carlos Vila<sup>a</sup>, M. Carmen Muñoz<sup>b</sup>, José R. Pedro<sup>a\*</sup>

<sup>a</sup> *Departament de Química Orgànica, Facultat de Química, Universitat de València, C/Dr. Moliner, 50, E-46100 Burjassot (València), Spain*

<sup>b</sup> *Departament de Física Aplicada, Universitat Politècnica de València, Camino de Vera s/n, 46022 València (Spain)*

### SUPPORTING INFORMATION

#### Table of Contents:

|                                                                                |     |
|--------------------------------------------------------------------------------|-----|
| General Experimental Methods .....                                             | S2  |
| Typical procedures and characterization data for compounds <b>1</b> .....      | S3  |
| Typical procedures and characterization data for compounds <b>3</b> .....      | S4  |
| Procedures and characterization data for compounds <b>4</b> and <b>5</b> ..... | S12 |
| <sup>1</sup> H and <sup>13</sup> C NMR spectra .....                           | S14 |
| Chiral analysis chromatograms .....                                            | S44 |
| X-Ray data for compound <b>3fd</b> .....                                       | S69 |
| References .....                                                               | S70 |

## **General Experimental Methods**

Reactions were carried out under nitrogen in test tubes or round bottom flasks oven-dried overnight at 120 °C. Dichloromethane, 1,2-dichloroethane and toluene were distilled from CaH<sub>2</sub>. THF was distilled from sodium benzophenone ketyl. Reactions were monitored by TLC analysis using Merck Silica Gel 60 F-254 thin layer plates. Flash column chromatography was performed on Merck silica gel 60, 0.040-0.063 mm. Melting points were determined in capillary tubes. NMR spectra were run at 300 MHz for <sup>1</sup>H and at 75 MHz for <sup>13</sup>C NMR using residual non-deuterated solvent as internal standard (CHCl<sub>3</sub>: δ 7.26 and 77.0 ppm). Chemical shifts are given in ppm. The carbon type was determined by DEPT experiments. High resolution mass spectra (ESI) were recorded on a AB SCIEX Triple TOF™ spectrometer equipped with an electrospray source with a capillary voltage of 4.5 kV(ESI). Specific optical rotations were measured using sodium light (D line 589 nm). Chiral HPLC analyses were performed in a chromatograph equipped with a UV diode-array detector using chiral stationary columns from Daicel. Commercially available alkynes were used as received.

## Typical procedures and characterization data for compounds 1

Benzoxathiazine 2,2-dioxides were prepared from the corresponding salicylaldehyde as described in the literature.<sup>1</sup> Products **1c**, **1d** and **1e** were not described in the literature:

### **8-methylbenzo-[e][1,2,3]oxathiazine 2,2-dioxide (1c)**

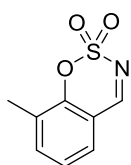

White solid; mp 89.5-90.9 °C; <sup>1</sup>H NMR (300 MHz, CDCl<sub>3</sub>) δ = 8.56 (s, 1H), 7.58 – 7.36 (m, 2H), 7.21 (t, *J* = 7.6 Hz, 1H), 2.25 (t, *J* = 0.8 Hz, 3H) ppm; <sup>13</sup>C NMR (75 MHz, CDCl<sub>3</sub>) δ = 168.2 (CH), 152.1 (C), 139.1 (CH), 128.6 (CH), 127.98 (C), 125.5 (CH), 114.9 (C), 14.2 (CH<sub>3</sub>) ppm; HRMS (ESI) *m/z*: 198.0212 [M + H]<sup>+</sup>, C<sub>8</sub>H<sub>8</sub>NO<sub>3</sub>S requires 198.0225.

### **6-(tert-butyl)benzo-[e][1,2,3]oxathiazine 2,2-dioxide (1d)**

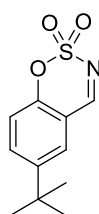

Yellow solid; mp 56.5-59.2 °; <sup>1</sup>H NMR (300 MHz, CDCl<sub>3</sub>) δ = 8.60 (d, *J* = 0.6 Hz, 1H), 7.71 (dd, *J* = 8.7, 2.4 Hz, 1H), 7.59 (d, *J* = 2.5 Hz, 1H), 7.19 – 7.07 (m, 1H), 1.28 (s, 9H) ppm; <sup>13</sup>C NMR (75 MHz, CDCl<sub>3</sub>) δ = 168.7 (CH), 152.5 (C), 150.2 (C), 135.7 (CH), 127.8 (CH), 118.5 (CH), 115.3 (C), 35.2 (C), 31.5 (CH<sub>3</sub>) ppm; HRMS (ESI) *m/z*: 240.0678 [M + H]<sup>+</sup>, C<sub>11</sub>H<sub>14</sub>NO<sub>3</sub>S requires 240.0694.

### **8-(tert-butyl)benzo-[e][1,2,3]oxathiazine 2,2-dioxide (1e)**

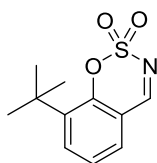

White solid; <sup>1</sup>H NMR (300 MHz, CDCl<sub>3</sub>) δ = 8.56 (s, 1H), 7.65 (dd, *J* = 7.9, 1.7 Hz, 1H), 7.45 (dd, *J* = 7.6, 1.6 Hz, 1H), 7.27 (d, *J* = 7.7 Hz, 1H), 1.35 (s, 9H) ppm; <sup>13</sup>C NMR (75 MHz, CDCl<sub>3</sub>) δ = 169.3 (CH), 153.5 (C), 140.7 (C), 135.8 (CH), 129.7 (CH), 126.4 (CH), 116.6 (C), 35.4 (C), 30.1 (CH<sub>3</sub>) ppm; HRMS (ESI) *m/z*: 240.0682 [M + H]<sup>+</sup>, C<sub>11</sub>H<sub>14</sub>NO<sub>3</sub>S requires

240.0694.

## Typical procedures and characterization data for compounds 3, 4 and 5

### General procedure for the enantioselective alkylation reaction

A 2 M Me<sub>2</sub>Zn solution in toluene (0.18 mL, 0.360 mmol) was added dropwise on a solution of **L7** (9.7 mg, 0.018 mmol) and alkyne **2** (0.360 mmol) in dichloroethane (0.3 mL) at room temperature under nitrogen. After stirring 1 hour, a solution of benzoxathiazine 2,2-dioxide **1** (0.090 mmol) in dichloroethane (1.0 mL) was added via syringe. The reaction was stirred until the reaction was complete (TLC). The reaction mixture was quenched with NH<sub>4</sub>Cl (10 mL), extracted with dichloromethane (3x15 mL), washed with brine (10 mL), dried over MgSO<sub>4</sub> and dried under reduced pressure. Purification by flash chromatography on silica gel afforded compound **3**.

**General procedure for the racemic alkylation reaction** A 1 M Et<sub>2</sub>Zn solution in hexane (0.30 mL, 0.300 mmol) was added dropwise on a solution of racemic BINOL (5.7 mg, 0.020 mmol) and alkyne **2** (0.720 mmol) in dichloroethane (0.4 mL) at room temperature under nitrogen. After stirring 1 hour, a solution of benzoxathiazine 2,2-dioxide **1** (0.100 mmol) in dichloroethane (1.0 mL) was added via syringe. The reaction was stirred until the reaction was complete (TLC). The reaction mixture was quenched with NH<sub>4</sub>Cl (10 mL), extracted with dichloromethane (3x15 mL), washed with brine (10 mL), dried over MgSO<sub>4</sub> and dried under reduced pressure. Purification by flash chromatography on silica gel afforded compound **3**.

### (-)-4-(phenylethynyl)-3,4-dihydrobenzo[e][1,2,3]oxathiazine 2,2-dioxide (**3aa**)

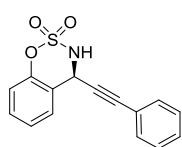

**3aa**

The enantiomeric excess (82%) was determined by chiral HPLC (Chiralpak ODH), hexane-iPrOH 90:10, 1 mL/min, major enantiomer  $t_r$  = 15.82 min, minor enantiomer  $t_r$  = 13.68 min.

Orange oil;  $[\alpha]_D^{20}$  = -32.6 (*c* 1.0, CHCl<sub>3</sub>, 82% *ee*); **<sup>1</sup>H NMR (300 MHz, CDCl<sub>3</sub>)**  $\delta$  7.61 (ddd, *J* = 7.8, 1.6, 1.1 Hz, 1H), 7.50 (dd, *J* = 7.8, 1.8 Hz, 2H), 7.44-7.33 (m, 4H), 7.28 (dd, *J* = 7.6, 1.3 Hz, 1H), 7.05 (dd, *J* = 8.2, 1.3 Hz, 1H), 5.94 (d, *J* = 10.0 Hz, 1H), 4.93 (d, *J* = 9.6 Hz, 1H); **<sup>13</sup>C NMR (75.5 MHz, CDCl<sub>3</sub>)**  $\delta$  150.6 (C), 132 (CH), 130.4 (CH), 129.5 (CH), 128.5 (CH), 127.6 (CH), 125.6 (CH), 121.1 (C), 119.6 (C), 118.7 (CH), 87.7 (C), 82.3 (C), 50.3 (CH); **IR** 3258, 2234, 1579, 1421, 1365, 1199, 1160, 1099, 880, 780, 685 cm<sup>-1</sup>; **HRMS (ESI)** *m/z*: 284.0376 [M - H]<sup>-</sup>, C<sub>15</sub>H<sub>10</sub>NO<sub>3</sub>S requires 284.0381.

### (-)-6-methyl-4-(phenylethynyl)-3,4-dihydrobenzo[e][1,2,3]oxathiazine 2,2-dioxide (**3ba**)

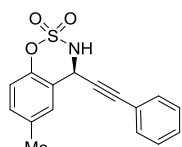

**3ba**

The enantiomeric excess (87%) was determined by chiral HPLC (Chiralpak IC), hexane-iPrOH 90:10, 1 mL/min, major enantiomer  $t_r$  = 16.46 min, minor enantiomer  $t_r$  = 25.98 min.

Orange oil;  $[\alpha]_D^{20}$  -76.73 (*c* 1.0, CHCl<sub>3</sub>, 87% *ee*); **<sup>1</sup>H NMR (300 MHz, CDCl<sub>3</sub>)**  $\delta$  7.52-7.49 (m, 2H), 7.41-7.33 (m, 4H), 7.19-7.15 (m, 1H), 6.94 (d, *J* = 8.4 Hz,

1H), 5.90 (d,  $J = 9.9$  Hz, 1H), 4.88 (d,  $J = 9.9$  Hz, 1H), 2.39 (s, 3H);  $^{13}\text{C}$  NMR (75.5 MHz,  $\text{CDCl}_3$ )  $\delta$ 148.5 (C), 135.5 (C), 132.0 (CH), 130.9 (CH), 129.5 (CH), 128.52 (CH), 127.7 (CH), 121.1 (C), 119.1 (C), 118.5 (CH), 87.6 (C), 82.5 (C), 50.3 (CH), 20.8 ( $\text{CH}_3$ ); IR 3256, 2920, 2204, 1524, 1488, 1377, 1352, 1199, 1174, 1096, 1032, 864, 764, 680  $\text{cm}^{-1}$ ; HRMS (ESI)  $m/z$ : 298.0532  $[\text{M} - \text{H}]^-$ ,  $\text{C}_{16}\text{H}_{12}\text{NO}_3\text{S}$  requires 298.0538.

**(-)-8-methyl-4-(phenylethynyl)-3,4-dihydrobenzo[e][1,2,3]oxathiazine 2,2-dioxide (3ca)**

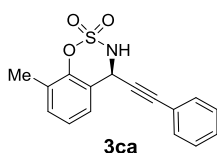

The enantiomeric excess (73%) was determined by chiral HPLC (Chiralpak IC), hexane-*i*PrOH 90:10, 1 mL/min, major enantiomer  $t_r = 12.22$  min, minor enantiomer  $t_r = 21.42$  min.

Orange oil;  $[\alpha]_D^{20} -6.00$  ( $c$  1.0,  $\text{CHCl}_3$ , 73% *ee*);  $^1\text{H}$  NMR (300 MHz,  $\text{CDCl}_3$ )  $\delta$ 7.51 – 7.48 (m, 2H), 7.48 – 7.42 (m, 1H), 7.41 – 7.32 (m, 3H), 7.26 – 7.22 (m, 1H), 7.15 (t,  $J = 7.6$  Hz, 1H), 5.92 (d,  $J = 10.2$  Hz, 1H), 4.84 (d,  $J = 10.0$  Hz, 1H), 3.30 (s, 3H);  $^{13}\text{C}$  NMR (75.5 MHz,  $\text{CDCl}_3$ )  $\delta$ 149.1 (C), 131.9 (CH), 131.8 (C), 129.4 (CH), 128.5 (CH), 128.1 (C), 125.0 (CH), 121.1 (C), 119.5 (CH), 87.8 (C), 82.6 (C), 50.3 (CH), 15.4 ( $\text{CH}_3$ ); IR 3261, 2920, 2204, 1582, 1421, 1377, 1341, 1202, 1146, 863, 827, 705, 688  $\text{cm}^{-1}$ ; HRMS (ESI)  $m/z$ : 298.0545  $[\text{M} - \text{H}]^-$ ,  $\text{C}_{16}\text{H}_{12}\text{NO}_3\text{S}$  requires 298.0538.

**(-)-6-(tert-butyl)-4-(phenylethynyl)-3,4-dihydrobenzo[e][1,2,3]oxathiazine 2,2-dioxide (3da)**

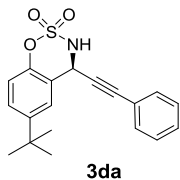

The enantiomeric excess (56%) was determined by chiral HPLC (Chiralpak IC), hexane-*i*PrOH 90:10, 1 mL/min, major enantiomer  $t_r = 8.16$  min, minor enantiomer  $t_r = 9.15$  min.

Brown oil;  $[\alpha]_D^{20} -77.26$  ( $c$  1.0,  $\text{CHCl}_3$ , 56% *ee*);  $^1\text{H}$  NMR (300 MHz,  $\text{CDCl}_3$ )  $\delta$  7.61 (dd,  $J = 2.4, 1.1$ , 1H), 7.55-7.45 (m, 2H), 7.43-7.30 (m, 4H), 6.98 (d,  $J = 8.7$  Hz, 1H), 5.93 (d,  $J = 10$  Hz, 1H), 4.83 (d,  $J = 10.0$  Hz, 1H), 1.34 (s, 9H);  $^{13}\text{C}$  NMR (75.5 MHz,  $\text{CDCl}_3$ )  $\delta$ 148.8 (C), 148.3 (C), 131.9 (CH), 129.4 (CH), 128.6 (CH), 127.4 (CH), 124.3 (CH), 121.2 (C), 118.7 (C), 118.1 (CH), 87.7 (C), 82.7 (C), 50.51 (CH), 34.6 (C), 31.3 ( $\text{CH}_3$ ); IR 3264, 2948, 2201, 1873, 1488, 1424, 1365, 1210, 1166, 1116, 1093, 845, 780, 685  $\text{cm}^{-1}$ ; HRMS (ESI)  $m/z$ : 340.1007  $[\text{M} - \text{H}]^-$ ,  $\text{C}_{19}\text{H}_{18}\text{NO}_3\text{S}$  requires 340.1007.

**(-)-8-(tert-butyl)-4-(phenylethynyl)-3,4-dihydrobenzo[e][1,2,3]oxathiazine 2,2-dioxide (3ea)**

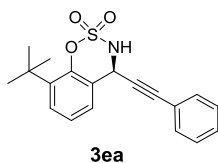

3ea

The enantiomeric excess (81%) was determined by chiral HPLC (Chiralpak OD-H), hexane-iPrOH 90:10, 1 mL/min, major enantiomer  $t_r = 10.08$  min, minor enantiomer  $t_r = 8.42$  min.

Mp 119 °C;  $[\alpha]_D^{20} +8.08$  ( $c$  1.0,  $\text{CHCl}_3$ , 81%  $ee$ );  $^1\text{H NMR}$  (300 MHz,  $\text{CDCl}_3$ )  $\delta$  7.52-7.48 (m, 3H), 7.42-7.34 (m, 4H), 7.20 (t,  $J = 7.8\text{Hz}$ , 1H), 5.90 (d,  $J = 10.1\text{Hz}$ , 1H), 4.86 (d,  $J = 10.1\text{Hz}$ , 1H), 1.44 (s, 9H);  $^{13}\text{C NMR}$  (75.5 MHz,  $\text{CDCl}_3$ )  $\delta$  149.9 (C), 140.1 (C), 131.9 (CH), 129.4 (CH), 128.5 (CH), 128.0 (CH), 125.4 (CH), 125.1 (CH), 121.3 (C), 121.2 (C), 87.8 (C), 82.6 (C), 50.1 (CH), 35.0 (C), 30.0 ( $\text{CH}_3$ ); IR 3217, 2961, 2249, 2208, 1596, 1485, 1427, 1391, 1357, 1182, 1154, 1093, 1032, 872, 733, 689  $\text{cm}^{-1}$ ; HRMS (ESI)  $m/z$ : 342.1159  $[\text{M} + \text{H}]^+$ ,  $\text{C}_{19}\text{H}_{20}\text{NO}_3\text{S}$  requires 342.1164.

**(-)-6-bromo-4-(phenylethynyl)-3,4-dihydrobenzo[e][1,2,3]oxathiazine 2,2-dioxide (3fa)**

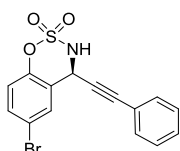

3fa

The enantiomeric excess (80%) was determined by chiral HPLC (Chiralpak AD-H), hexane-iPrOH 90:10, 1 mL/min, major enantiomer  $t_r = 10.63$  min, minor enantiomer  $t_r = 12.47$  min.

Aceite naranja;  $[\alpha]_D^{20} -114.82$  ( $c$  1.0,  $\text{CHCl}_3$ , 80%  $ee$ );  $^1\text{H NMR}$  (300 MHz,  $\text{CDCl}_3$ )  $\delta$  7.73 (dd,  $J = 2.4, 1.1$  Hz, 1H), 7.58-7.46 (m, 3H), 7.45-7.33 (m, 3H), 6.94 (d,  $J = 8.8\text{Hz}$ , 1H), 5.91 (d,  $J = 10.0$  Hz, 1H), 4.94 (d,  $J = 10.0$  Hz, 1H);  $^{13}\text{C NMR}$  (75.5 MHz,  $\text{CDCl}_3$ )  $\delta$  149.6 (C), 133.4 (CH), 132.1 (CH), 130.4 (CH), 129.7 (CH), 128.6 (CH), 121.5 (C), 120.7 (C), 120.4 (CH), 118.3 (C), 88.4 (C), 81.4 (C), 49.9 (CH); IR 3276, 2914, 2237, 2196, 1596, 1427, 1366, 1210, 1185, 1107, 874, 753, 686  $\text{cm}^{-1}$ ; HRMS (ESI)  $m/z$ : 361.9472  $[\text{M} - \text{H}]^-$ ,  $\text{C}_{15}\text{H}_9\text{BrNO}_3\text{S}$  requires 361.9487.

**(-)-4-((4-methoxyphenyl)ethynyl)-3,4-dihydrobenzo[e][1,2,3]oxathiazine 2,2-dioxide (3ab)**

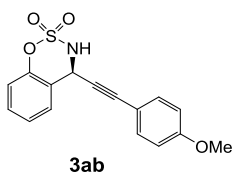

3ab

The enantiomeric excess (83%) was determined by chiral HPLC (Chiralpak IC), hexane-iPrOH 90:10, 1 mL/min, major enantiomer  $t_r = 23.85$  min, minor enantiomer  $t_r = 32.73$  min.

Yellow oil;  $[\alpha]_D^{20} -26.13$  ( $c$  1.0,  $\text{CHCl}_3$ , 83%  $ee$ );  $^1\text{H NMR}$  (300 MHz,  $\text{CDCl}_3$ )  $\delta$  7.61 (dt,  $J = 7.9, 1.4$  Hz, 1H), 7.48 – 7.37 (m, 2H), 7.37 (ddd,  $J = 8.3, 1.7, 0.8\text{Hz}$ , 1H), 7.31 (td,  $J = 7.5, 1.2$  Hz, 1H), 7.05 (dd,  $J = 8.2, 1.2$  Hz, 1H), 6.87 (dt,  $J = 9.2, 2.7$  Hz, 2H), 5.92 (d,  $J = 10.0$  Hz, 1H), 4.85 (d,  $J = 10.0$  Hz, 1H), 3.83 (s, 3H);  $^{13}\text{C NMR}$  (75.5 MHz,  $\text{CDCl}_3$ )  $\delta$  160.5 (C), 150.6 (C), 133.5 (CH), 130.3 (CH), 127.6 (CH), 125.6 (CH), 119.9 (C), 118.7 (CH), 114.2 (CH), 113.0 (C), 87.9 (C), 81.1 (C), 55.35 (CH), 50.40 ( $\text{CH}_3$ ); IR 3256, 2925, 2234, 2181, 1596, 1507, 1418, 1371, 1246, 1160, 1093, 1021, 758  $\text{cm}^{-1}$ ; HRMS (ESI)  $m/z$ : 316.0638  $[\text{M} + \text{H}]^+$ ,  $\text{C}_{16}\text{H}_{14}\text{NO}_4\text{S}$  requires 316.0644.

**(-)-4-((4-methoxyphenyl)ethynyl)-6-methyl-3,4-dihydrobenzo[e][1,2,3]oxathiazine 2,2-dioxide (3bb)**

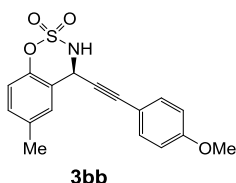

The enantiomeric excess (87%) was determined by chiral HPLC (Chiralpak IC), hexane-iPrOH 90:10, 1 mL/min, major enantiomer  $t_r$  = 29.96 min, minor enantiomer  $t_r$  = 40.36 min.

Yellow oil;  $[\alpha]_D^{20}$  -47.60 ( $c$  1.0,  $\text{CHCl}_3$ , 87%  $ee$ );  **$^1\text{H NMR}$  (300 MHz,  $\text{CDCl}_3$ )**  $\delta$  7.47 – 7.39 (m, 2H), 7.36 (dt,  $J$  = 2.1, 0.9 Hz, 1H), 7.17 (ddt,  $J$  = 8.4, 2.2, 0.8 Hz, 1H), 6.94 (d,  $J$  = 8.4 Hz, 1H), 6.92 – 6.83 (m, 1H), 5.88 (d,  $J$  = 9.9 Hz, 1H), 4.78 (d,  $J$  = 9.9 Hz, 1H), 3.83 (s, 3H), 2.37 (s, 3H);  **$^{13}\text{C NMR}$  (75.5 MHz,  $\text{CDCl}_3$ )**  $\delta$  160.5 (C), 148.5 (C), 135.5 (C), 133.6 (CH), 130.9 (CH), 127.7 (CH), 119.3 (C), 118.4 (CH), 114.2 (CH), 113.1 (C), 87.6 (C), 81.3 (C), 55.4 ( $\text{CH}_3$ ), 50.4 (CH), 20.8 ( $\text{CH}_3$ ); **IR** 3253, 2920, 2184, 1604, 1510, 1426, 1363, 1247, 1169, 1102, 824, 752, 690  $\text{cm}^{-1}$ ; **HRMS** (ESI)  $m/z$ : 330.0793 [ $\text{M} + \text{H}$ ]<sup>+</sup>,  $\text{C}_{17}\text{H}_{16}\text{NO}_4\text{S}$  requires 330.0800.

**(-)-4-((2-methoxyphenyl)ethynyl)-3,4-dihydrobenzo[e][1,2,3]oxathiazine 2,2-dioxide (3ac)**

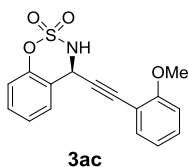

The enantiomeric excess (65%) was determined by chiral HPLC (Chiralpak IC), hexane-iPrOH 90:10, 1 mL/min, major enantiomer  $t_r$  = 19.21 min, minor enantiomer  $t_r$  = 28.89 min.

Mp 104 °C;  $[\alpha]_D^{20}$  -25.47 ( $c$  1.0,  $\text{CHCl}_3$ , 65%  $ee$ );  **$^1\text{H NMR}$  (300 MHz,  $\text{CDCl}_3$ )**  $\delta$  7.69 (dt,  $J$  = 7.7, 1.5 Hz, 1H), 7.43 (dd,  $J$  = 7.5, 1.7 Hz, 1H), 7.42 – 7.34 (m, 2H), 7.26 (td,  $J$  = 7.5, 1.2 Hz, 1H), 7.04 (dd,  $J$  = 8.2, 1.2 Hz, 1H), 6.96 – 6.90 (m, 2H), 5.99 (d,  $J$  = 10.1 Hz, 1H), 4.91 (d,  $J$  = 10.1 Hz, 1H), 3.89 (s, 3H);  **$^{13}\text{C NMR}$  (75.5 MHz,  $\text{CDCl}_3$ )**  $\delta$  160.5 (C), 150.6 (C), 133.7 (CH), 130.9 (CH), 130.2 (CH), 127.8 (CH), 125.5 (CH), 120.5 (CH), 119.8 (C), 118.5 (CH), 110.8 (CH), 110.3 (C), 86.2 (C), 84.2 (C), 55.7 ( $\text{CH}_3$ ), 50.5 (CH); **IR** 3203, 2902, 2237, 2193, 1590, 1485, 1443, 1349, 1318, 1279, 1252, 1185, 1149, 1116, 932, 874, 771  $\text{cm}^{-1}$ ; **HRMS** (ESI)  $m/z$ : 316.0638 [ $\text{M} + \text{H}$ ]<sup>+</sup>,  $\text{C}_{16}\text{H}_{14}\text{NO}_4\text{S}$  requires 316.0644.

**(-)-4-((2-methoxyphenyl)ethynyl)-6-methyl-3,4-dihydrobenzo[e][1,2,3]oxathiazine 2,2-dioxide (3bc)**

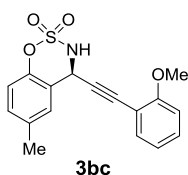

The enantiomeric excess (68%) was determined by chiral HPLC (Chiralpak IC), hexane-iPrOH 90:10, 1 mL/min, major enantiomer  $t_r$  = 25.23 min, minor enantiomer  $t_r$  = 41.05 min.

Mp 158 °C;  $[\alpha]_D^{20}$  -58.26 ( $c$  1.0,  $\text{CHCl}_3$ , 68%  $ee$ );  **$^1\text{H NMR}$  (300 MHz,  $\text{CDCl}_3$ )**  $\delta$  7.48 – 7.43 (m, 2H), 7.40 – 7.32 (m, 1H), 7.19 – 7.15 (m, 1H), 6.98 – 6.88 (m, 3H), 5.94 (d,  $J$  = 10.2 Hz, 1H), 4.85 (d,  $J$  = 10.0 Hz, 1H), 3.90 (s, 3H), 2.37 (s, 3H);  **$^{13}\text{C NMR}$  (75.5 MHz,  $\text{CDCl}_3$ )**  $\delta$  160.6 (C), 148.5 (C), 135.5 (C), 133.7 (CH), 130.9 (CH), 130.8 (CH), 129.0 (CH), 120.5 (CH), 119.4 (C), 118.3 (CH), 110.7 (CH), 110.4 (C), 86.3 (C), 84.2 (C), 55.7 ( $\text{CH}_3$ ), 50.5 (CH), 20.9 ( $\text{CH}_3$ ); **IR** 3222, 2845, 2234,

2193, 1565, 1482, 1460, 1426, 1349, 1174, 1157, 1035, 785, 680  $\text{cm}^{-1}$ ; **HRMS** (ESI)  $m/z$ : 330.0804  $[\text{M} + \text{H}]^+$ ,  $\text{C}_{17}\text{H}_{16}\text{NO}_4\text{S}$  requires 330.0800.

**(-)-4-((3,5-dimethoxyphenyl)ethynyl)-3,4-dihydrobenzo[e][1,2,3]oxathiazine 2,2-dioxide (3ad)**

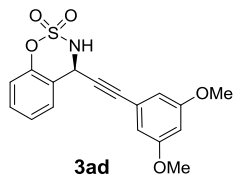

The enantiomeric excess (80%) was determined by chiral HPLC (Chiralpak ADH), hexane-*i*PrOH 90:10, 1 mL/min, major enantiomer  $t_r = 12.32$  min, minor enantiomer  $t_r = 19.33$  min.

Mp 127  $^{\circ}\text{C}$ ;  $[\alpha]_{\text{D}}^{20} -25.50$  ( $c$  1.0,  $\text{CHCl}_3$ , 80% *ee*);  **$^1\text{H}$  NMR (300 MHz,  $\text{CDCl}_3$ )**  $\delta$ 7.61 – 7.57 (m, 1H), 7.42 – 7.36 (m, 1H), 7.27 (td,  $J = 7.6, 1.3$  Hz, 1H), 7.05 (dd,  $J = 8.1, 1.3$  Hz, 1H), 6.63 (d,  $J = 2.3$  Hz, 2H), 6.48 (dt,  $J = 10.1, 2.3$  Hz, 1H), 5.92 (d,  $J = 9.87$  Hz, 1H), 4.96 (d,  $J = 9.9$  Hz, 1H), 3.79 (s, 6H);  **$^{13}\text{C}$  NMR (75.5 MHz,  $\text{CDCl}_3$ )**  $\delta$ 160.6 (C), 150.5 (C), 130.4 (CH), 127.6 (CH), 125.6 (CH), 122.3 (C), 119.5 (C), 118.7 (CH), 109.8 (CH), 102.6 (CH), 87.6 (C), 81.8 (C), 55.5 ( $\text{CH}_3$ ), 50.2 (CH); **IR** 3233, 2945, 2248, 2217, 1576, 1415, 1388, 1357, 1191, 1152, 1071, 932, 846, 746, 672  $\text{cm}^{-1}$ ; **HRMS** (ESI)  $m/z$ : 346.0757  $[\text{M} + \text{H}]^+$ ,  $\text{C}_{17}\text{H}_{16}\text{NO}_5\text{S}$  requires 346.0749.

**(-)-4-((3,5-dimethoxyphenyl)ethynyl)-6-methyl-3,4-dihydrobenzo[e][1,2,3]-oxathiazine 2,2-dioxide (3bd)**

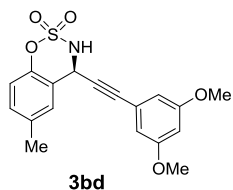

The enantiomeric excess (82%) was determined by chiral HPLC (Chiralpak ADH), hexane-*i*PrOH 90:10, 1 mL/min, major enantiomer  $t_r = 12.10$  min, minor enantiomer  $t_r = 19.93$  min.

Mp 135  $^{\circ}\text{C}$ ;  $[\alpha]_{\text{D}}^{20} -65.18$  ( $c$  1.0,  $\text{CHCl}_3$ , 82% *ee*);  **$^1\text{H}$  NMR (300 MHz,  $\text{CDCl}_3$ )**  $\delta$ 7.36 – 7.34 (m, 1H), 7.20 – 7.15 (m, 1H), 6.93 (d,  $J = 8.4$  Hz, 1H), 6.64 (d,  $J = 2.3$  Hz, 2H), 6.50 (t,  $J = 2.3$  Hz, 1H), 5.87 (d,  $J = 10.0$  Hz, 1H), 4.91 (d,  $J = 9.9$  Hz, 1H), 3.79 (s, 6H), 2.37 (s, 3H);  **$^{13}\text{C}$  NMR (75.5 MHz,  $\text{CDCl}_3$ )**  $\delta$ 160.6 (C), 148.4 (C), 135.5 (C), 130.9 (C), 127.6 (CH), 122.4 (C), 119.0 (C), 118.4 (CH), 109.8 (CH), 102.6 (CH), 87.4 (C), 82.0 (C), 55.5 ( $\text{CH}_3$ ), 50.2 (CH), 20.8 ( $\text{CH}_3$ ); **IR** 3253, 2950, 2245, 2221, 1587, 1424, 1365, 1340, 1204, 1177, 1149, 1102, 1038, 838, 799, 677  $\text{cm}^{-1}$ ; **HRMS** (ESI)  $m/z$ : 360.0905  $[\text{M} + \text{H}]^+$ ,  $\text{C}_{18}\text{H}_{18}\text{NO}_5\text{S}$  requires 360.0906.

**(-)-6-bromo-4-((3,5-dimethoxyphenyl)ethynyl)-3,4-dihydrobenzo[e][1,2,3]-oxathiazine 2,2-dioxide (3fd)**

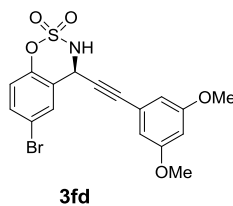

The enantiomeric excess (82%) (96% *ee* after crystallization) was determined by chiral HPLC (Chiralpak ODH), hexane-*i*PrOH 90:10, 1 mL/min, major enantiomer  $t_r = 22.01$  min, minor enantiomer  $t_r = 39.14$  min.



Orange oil;  $[\alpha]_D^{20}$  -109.36 (*c* 1.0, CHCl<sub>3</sub>, 82% *ee*); **NMR** <sup>1</sup>H (300 MHz, CDCl<sub>3</sub>) δ 7.71 (dd, *J* = 2.5, 1.2 Hz, 1H), 7.49 (dd, *J* = 8.8, 2.4 Hz, 1H), 6.93 (d, *J* = 9.1 Hz, 1H), 6.64 (d, *J* = 2.2 Hz, 2H), 6.51 (t, *J* = 2.3 Hz, 1H), 5.88 (d, *J* = 7.0 Hz, 1H), 4.97 (d, *J* = 8.0 Hz, 1H), 3.80 (s, 6H); <sup>13</sup>C (75.5 MHz, CDCl<sub>3</sub>) δ 160.6 (C), 149.6 (C), 133.4 (CH), 130.4 (CH), 121.9 (C), 121.4 (C), 120.4 (CH), 118.3 (C), 109.9 (CH), 102.8 (CH), 88.3 (C), 81.0 (C), 55.5 (CH<sub>3</sub>), 49.9 (CH); **HRMS** (ESI) *m/z*: 423.9851 [M + H]<sup>+</sup>, C<sub>17</sub>H<sub>15</sub>BrNO<sub>5</sub>S requires 422.9854.

**(-)-4-((4-chlorophenyl)ethynyl)-3,4-dihydrobenzo[e][1,2,3]oxathiazine 2,2-dioxide (3ae)**

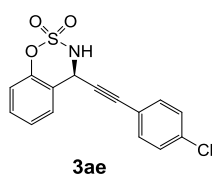

The enantiomeric excess (81%) was determined by chiral HPLC (Chiralpak IC), hexane-*i*PrOH 90:10, 1 mL/min, major enantiomer *t<sub>r</sub>* = 11.95 min, minor enantiomer *t<sub>r</sub>* = 19.02 min.

Mp 93 °C;  $[\alpha]_D^{20}$  -26.41 (*c* 1.0, CHCl<sub>3</sub>, 81% *ee*); **<sup>1</sup>H NMR** (300 MHz, CDCl<sub>3</sub>) δ 7.57 (dt, *J* = 7.8, 1.2 Hz, 1H), 7.45 – 7.39 (m, 3H), 7.37 – 7.32 (m, 2H), 7.27 (td, *J* = 7.8, 1.5 Hz, 1H), 7.05 (dd, *J* = 8.2, 1.2 Hz, 1H), 5.93 (d, *J* = 9.9 Hz, 1H), 4.98 (d, *J* = 9.9 Hz, 1H); **<sup>13</sup>C NMR** (75.5 MHz, CDCl<sub>3</sub>) δ 150.5 (C), 135.7 (C), 133.2 (CH), 130.4 (CH), 128.9 (CH), 127.5 (CH), 125.6 (CH), 119.5 (C), 119.4 (C), 118.8 (CH), 86.5 (C), 83.4 (C), 50.2 (CH); **IR** 3226, 2920, 2234, 2206, 1525, 1485, 1421, 1371, 1185, 1160, 1088, 941, 855, 655 cm<sup>-1</sup>; **HRMS** (ESI) *m/z*: 317.9993 [M - H]<sup>-</sup>, C<sub>15</sub>H<sub>9</sub>ClNO<sub>3</sub>S requires 317.9992.

**(-)-4-((4-chlorophenyl)ethynyl)-6-methyl-3,4-dihydrobenzo[e][1,2,3]oxathiazine 2,2-dioxide (3be)**

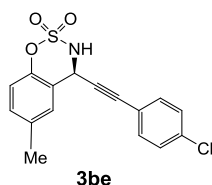

The enantiomeric excess (86%) was determined by chiral HPLC (Chiralpak IC), hexane-*i*PrOH 90:10, 1 mL/min, major enantiomer *t<sub>r</sub>* = 14.06 min, minor enantiomer *t<sub>r</sub>* = 20.77 min.

Brown oil;  $[\alpha]_D^{20}$  -46.06 (*c* 1.0, CHCl<sub>3</sub>, 86% *ee*); **<sup>1</sup>H NMR** (300 MHz, CDCl<sub>3</sub>) δ 7.46 – 7.41 (m, 2H), 7.36 – 7.33 (m, 3H), 7.20 – 7.16 (m, 1H), 6.94 (d, *J* = 8.4 Hz, 1H), 5.88 (d, *J* = 9.6 Hz, 1H), 4.82 (d, *J* = 9.8 Hz, 1H), 2.37 (s, 3H); **<sup>13</sup>C NMR** (75.5 MHz, CDCl<sub>3</sub>) δ 148.4 (C), 135.7 (C), 135.6 (C), 133.2 (CH), 131.0 (CH), 128.9 (CH), 127.6 (CH), 119.6 (C), 118.9 (C), 118.6 (CH), 86.4 (C), 83.6 (C), 50.2 (CH), 20.9 (C); **IR** 3256, 2926, 2206, 1530, 1485, 1418, 1360, 1177, 1105, 1015, 852, 824, 780 cm<sup>-1</sup>; **HRMS** (ESI) *m/z*: 332.0141 [M - H]<sup>-</sup>, C<sub>16</sub>H<sub>11</sub>ClNO<sub>3</sub>S requires 332.0148.

**(-)-4-(thiophen-2-ylethynyl)-3,4-dihydrobenzo[e][1,2,3]oxathiazine 2,2-dioxide (3af)**

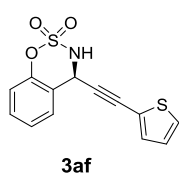

The enantiomeric excess (79%) was determined by chiral HPLC (Chiralpak IC), hexane-*i*PrOH 90:10, 1 mL/min, major enantiomer *t<sub>r</sub>* = 8.82 min, minor enantiomer *t<sub>r</sub>* = 11.89 min.

Brown oil;  $[\alpha]_D^{20}$  = -13.4 (*c* 1.0, CHCl<sub>3</sub>, 79% *ee*); **<sup>1</sup>H NMR** (300 MHz, CDCl<sub>3</sub>) δ 7.58 (dt, *J* = 7.8, 1.4 Hz, 1H), 7.46 – 7.34 (m, 1H), 7.35 (dd, *J* = 5.2, 1.2 Hz,

1H), 7.32 (dd,  $J = 3.6, 1.2$  Hz, 1H), 7.27 (td,  $J = 7.6, 1.3$  Hz, 1H), 7.06 (dd,  $J = 8.2, 1.3$  Hz, 1H), 7.02 (dd,  $J = 5.1, 3.7$  Hz, 1H), 5.96 (d,  $J = 9.8$  Hz, 1H), 4.93 (d,  $J = 9.9$  Hz, 1H);  $^{13}\text{C}$  NMR (75.5 MHz,  $\text{CDCl}_3$ )  $\delta$ 150.5 (C), 133.7 (CH), 130.4 (CH), 128.7 (CH), 127.6 (CH), 127.2 (C), 125.7 (CH), 120.7 (C), 119.3 (C), 118.8 (CH), 86.2 (C), 81.2 (C), 50.5 (CH); IR 3256, 3097, 2228, 2182, 1579, 1418, 1369, 1191, 1163, 1093, 1021, 877, 752  $\text{cm}^{-1}$ ; HRMS (ESI)  $m/z$ : 289.9946  $[\text{M} - \text{H}]^-$ ,  $\text{C}_{13}\text{H}_8\text{NO}_3\text{S}_2$  requires 289.9946.

**(-)-6-methyl-4-(thiophen-2-ylethynyl)-3,4-dihydrobenzo[e][1,2,3]oxathiazine 2,2-dioxide (3bf)**

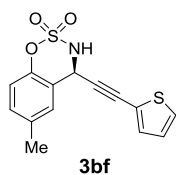

The enantiomeric excess (86%) was determined by chiral HPLC (Chiralpak IC), hexane-*i*PrOH 90:10, 1 mL/min, major enantiomer  $t_r = 17.86$  min, minor enantiomer  $t_r = 24.74$  min.

Brown oil;  $[\alpha]_D^{20} -24.1$  ( $c$  1.0,  $\text{CHCl}_3$ , 86% *ee*);  $^1\text{H}$  NMR (300 MHz,  $\text{CDCl}_3$ )  $\delta$ 7.36 (dd,  $J = 5.1, 1.2$  Hz, 1H), 7.33 (dt,  $J = 3.7, 1.2$  Hz, 1H), 7.20 – 7.16 (m, 1H), 7.03 (dd,  $J = 5.1, 3.7$  Hz, 1H), 6.94 (d,  $J = 8.4$  Hz, 1H), 5.91 (br s, 1H), 4.84 (br s, 1H), 2.37 (s, 3H);  $^{13}\text{C}$  NMR (75.5 MHz,  $\text{CDCl}_3$ )  $\delta$ 148.4 (C), 135.6 (C), 133.7 (CH), 131.0 (CH), 128.6 (CH), 127.6 (CH), 127.2 (CH), 120.9 (C), 118.8 (C), 118.5 (CH), 86.4 (C), 81.0 (C), 50.4 (CH), 20.8 ( $\text{CH}_3$ ); IR 3256, 2978, 2229, 2184, 1488, 1421, 1365, 1166, 1105, 1035, 846, 791, 652  $\text{cm}^{-1}$ ; HRMS (ESI)  $m/z$ : 304.0107  $[\text{M} - \text{H}]^-$ ,  $\text{C}_{14}\text{H}_{10}\text{NO}_3\text{S}_2$  requires 304.0102.

**(-)-4-(4-phenylbut-1-yn-1-yl)-3,4-dihydrobenzo[e][1,2,3]oxathiazine 2,2-dioxide (3ag)**

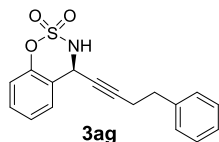

The enantiomeric excess (60%) was determined by chiral HPLC (Chiralpak IC), hexane-*i*PrOH 90:10, 1 mL/min, major enantiomer  $t_r = 14.04$  min, minor enantiomer  $t_r = 16.72$  min.

Brown oil;  $[\alpha]_D^{20} -30.34$  ( $c$  1.0,  $\text{CHCl}_3$ , 60% *ee*);  $^1\text{H}$  NMR (300 MHz,  $\text{CDCl}_3$ )  $\delta$  7.37 – 7.27 (m, 4H), 7.24 – 7.15 (m, 4H), 7.00 (dd,  $J = 8.2, 1.1$  Hz, 1H), 5.64 (d,  $J = 8.2$  Hz, 1H), 4.64 (d, 8.3 Hz, 1H), 2.88 (t,  $J = 7.3$  Hz, 2H), 2.61 (td,  $J = 7.2, 2.2$  Hz, 2H);  $^{13}\text{C}$  NMR (75.5 MHz,  $\text{CDCl}_3$ )  $\delta$ 150.4 (C), 139.9 (C), 130.1 (C), 128.5 (CH), 127.6 (CH), 126.6 (CH), 125.4 (CH), 119.9 (C), 118.5 (CH), 88.1 (C), 74.9 (C), 49.9 (CH), 34.4 ( $\text{CH}_2$ ), 20.7 ( $\text{CH}_2$ ); IR 3275, 2928, 2245, 2226, 1576, 1421, 1396, 1360, 1191, 1160, 1085, 1021, 871, 749, 699  $\text{cm}^{-1}$ ; HRMS (ESI)  $m/z$ : 312.0689  $[\text{M} - \text{H}]^-$ ,  $\text{C}_{17}\text{H}_{14}\text{NO}_3\text{S}$  requires 312.0694.

**(-)-6-methyl-4-(4-phenylbut-1-yn-1-yl)-3,4-dihydrobenzo[e][1,2,3]oxathiazine 2,2-dioxide (3bg)**

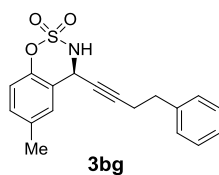

The enantiomeric excess (65%) was determined by chiral HPLC (Chiralpak IC), hexane-*i*PrOH 90:10, 1 mL/min, major enantiomer  $t_r = 16.53$  min, minor enantiomer  $t_r = 19.80$  min.

Mp 84 °C;  $[\alpha]_D^{20}$  -55.94 (*c* 1.0, CHCl<sub>3</sub>, 65% *ee*); **<sup>1</sup>H NMR (300 MHz, CDCl<sub>3</sub>)** δ 7.35 – 7.29 (m, 2H), 7.27 – 7.21 (m, 3H), 7.15 – 7.11 (m, 2H), 6.89 (d, *J* = 9 Hz, 1H), 5.60 (d, *J* = 9.9 Hz, 1H), 4.57 (d, *J* = 10 Hz, 1H), 2.88 (t, *J* = 7.3 Hz, 2H), 2.61 (dt, *J* = 6.9, 2.4 Hz, 2H), 2.32 (s, 3H); **<sup>13</sup>C NMR (75.5 MHz, CDCl<sub>3</sub>)** δ 148.3 (C), 140.0 (C), 135.3 (C), 130.7 (CH), 128.5 (CH), 127.7 (CH), 126.6 (CH), 119.4 (C), 118.3 (C), 87.9 (C), 75.0 (C), 49.9 (CH), 34.4 (CH<sub>2</sub>), 20.81 (CH<sub>2</sub>), 20.8 (C); **IR** 3259, 2925, 2235, 1404, 1352, 1207, 1179, 1143, 1099, 849, 749, 696 cm<sup>-1</sup>; **HRMS (ESI)** *m/z*: 345.1262 [M + NH<sub>4</sub>]<sup>+</sup>, C<sub>18</sub>H<sub>21</sub>N<sub>2</sub>O<sub>3</sub>S requires 345.1273.

**(-)-4-(cyclopropylethynyl)-3,4-dihydrobenzo[e][1,2,3]oxathiazine 2,2-dioxide (3ah)**

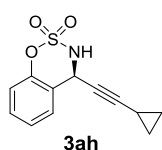

The enantiomeric excess (74%) was determined by chiral HPLC (Chiralpak ADH), hexane-*i*PrOH 90:10, 1 mL/min, major enantiomer *t<sub>r</sub>* = 9.49 min, minor enantiomer *t<sub>r</sub>* = 11.12 min.

Mp 85 °C;  $[\alpha]_D^{20}$  -57.19 (*c* 1.0, CHCl<sub>3</sub>, 74% *ee*); **<sup>1</sup>H NMR (300 MHz, CDCl<sub>3</sub>)** δ 7.50 (dt, *J* = 7.7, 1.2 Hz, 1H), 7.38 – 7.32 (m, 1H), 7.23 (td, *J* = 7.6, 1.4 Hz, 1H), 5.64 (d, *J* = 10.0 Hz, 1H), 4.70 (d, *J* = 9.9 Hz, 1H), 1.36 – 1.28 (m, 1H), 0.90 – 0.83 (m, 2H), 0.79 – 0.74 (m, 2H); **<sup>13</sup>C NMR (75.5 MHz, CDCl<sub>3</sub>)** δ 150.5 (C), 130.1 (CH), 127.6 (CH), 125.4 (CH), 120.1 (C), 118.5 (CH), 92.1 (C), 68.9 (C), 50.0 (CH), 8.5 (CH<sub>2</sub>), 8.4 (CH<sub>2</sub>), 0.7 (CH); **IR** 3239, 2925, 2245, 2201, 1574, 1415, 1363, 1185, 1157, 1088, 885, 774, 647 cm<sup>-1</sup>; **HRMS (ESI)** *m/z*: 248.0374 [M - H]<sup>-</sup>, C<sub>12</sub>H<sub>10</sub>NO<sub>3</sub>S requires 248.0381.

**(-)-4-(cyclopropylethynyl)-6-methyl-3,4-dihydrobenzo[e][1,2,3]oxathiazine 2,2-dioxide (3bh)**

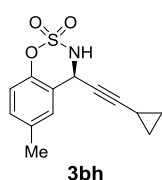

The enantiomeric excess (78%) was determined by chiral HPLC (Chiralpak ADH), hexane-*i*PrOH 90:10, 1 mL/min, major enantiomer *t<sub>r</sub>* = 10.76 min, minor enantiomer *t<sub>r</sub>* = 9.49 min.

Orange oil;  $[\alpha]_D^{20}$  -83.56 (*c* 1.0, CHCl<sub>3</sub>, 78% *ee*). **<sup>1</sup>H MR (300 MHz, CDCl<sub>3</sub>)** δ 7.26 (br s, 1H), 7.15 – 7.12 (m, 1H), 6.89 (d, *J* = 8.4 Hz, 1H), 5.59 (d, *J* = 9.9 Hz, 1H), 4.65 (d, *J* = 9.0 Hz, 1H), 2.36 (s, 3H), 1.36 – 1.31 (m, 1H), 0.90-0.8 (m, 2H), 0.80 - 0.74 (m, 2H). **<sup>13</sup>C NMR (75.5 MHz, CDCl<sub>3</sub>)** δ 148.4 (C), 135.3 (C), 130.7 (CH), 127.7 (CH), 119.6 (C), 118.3 (CH), 91.9 (C), 69.1 (C), 50.0 (CH), 20.81 (CH<sub>3</sub>), 8.5 (CH<sub>2</sub>), 8.4 (CH<sub>2</sub>), 0.6 (CH). **IR** 3264, 2923, 2248, 2215, 1529, 1421, 1365, 1202, 1168, 1102, 846, 658 cm<sup>-1</sup>; **HRMS (ESI)** *m/z*: 262.0523 [M - H]<sup>-</sup>, C<sub>13</sub>H<sub>12</sub>NO<sub>3</sub>S requires 262.0538.

**(-)-4-(3,3-dimethylbut-1-yn-1-yl)-3,4-dihydrobenzo[e][1,2,3]oxathiazine 2,2-dioxide (3ai)**

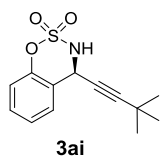

The enantiomeric excess (79%) was determined by chiral HPLC (Chiralpak ADH), hexane-*i*PrOH 90:10, 1 mL/min, major enantiomer *t<sub>r</sub>* = 4.98 min, minor enantiomer *t<sub>r</sub>* = 5.31 min.

Orange oil;  $[\alpha]_D^{20}$  -58.46 (*c* 1.0, CHCl<sub>3</sub>, 79% *ee*); **<sup>1</sup>H NMR (300 MHz, CDCl<sub>3</sub>)** δ 7.49 (dt, *J* = 7.7, 1.6 Hz, 1H), 7.39 – 7.33 (m, 1H), 7.24 (dt, *J* = 7.5, 1.4 Hz, 1H), 7.01 (dd, *J* = 8.2, 1.2 Hz, 1H), 5.68 (d, *J* = 10.2 Hz, 1H), 4.67 (d, *J* = 10.1 Hz, 1H), 1.28 (s, 9H); **<sup>13</sup>C NMR (75.5 MHz, CDCl<sub>3</sub>)** δ 150.5 (C), 130.1 (CH), 127.5 (CH), 125.5 (CH), 120.3 (C), 118.5 (CH), 97.2 (C), 72.4 (C), 49.9 (CH), 30.6 (CH<sub>3</sub>), 27.6 (C); **IR** 3259, 2967, 2240, 2212, 1418, 1369, 1193, 1160, 1071, 880, 752 cm<sup>-1</sup>; **HRMS (ESI)** *m/z*: 264.0693 [M - H]<sup>-</sup>; C<sub>13</sub>H<sub>15</sub>NO<sub>3</sub>S requires 264.0694.

**(-)-4-(3,3-dimethylbut-1-yn-1-yl)-6-methyl-3,4-dihydrobenzo[e][1,2,3]oxathiazine 2,2-dioxide (3bi)**

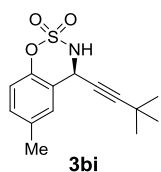

The enantiomeric excess (86%) was determined by chiral HPLC (Chiralpak ADH), hexane-*i*PrOH 90:10, 1 mL/min, major enantiomer *t<sub>r</sub>* = 4.70 min, minor enantiomer *t<sub>r</sub>* = 5.33 min.

**Mp** 103 °C;  $[\alpha]_D^{20}$  -93.85 (*c* 1.0, CHCl<sub>3</sub>, 86% *ee*); **<sup>1</sup>H NMR (300 MHz, CDCl<sub>3</sub>)** δ 7.27 – 7.25 (m, 1H), 7.14 – 7.12 (m, 1H), 6.90 (d, *J* = 8.4 Hz, 1H), 5.63 (d, *J* = 10.2 Hz, 1H), 4.81 (d, *J* = 10.2 Hz, 1H), 2.36 (s, 3H), 1.28 (s, 9H); **<sup>13</sup>C NMR (75.5 MHz, CDCl<sub>3</sub>)** δ 148.4 (C), 135.3 (C), 130.7 (CH), 127.9 (CH), 119.8 (C), 118.2 (CH), 97.0 (C), 72.6 (C), 49.8 (CH), 30.6 (CH<sub>3</sub>), 27.6 (C), 20.9 (CH<sub>3</sub>); **IR** 3256, 2967, 2242, 2220, 1492, 1410, 1371, 1202, 1177, 1141, 1081, 863, 688 cm<sup>-1</sup>; **HRMS (ESI)** *m/z*: 278.0842 [M - H]<sup>-</sup>; C<sub>14</sub>H<sub>16</sub>NO<sub>3</sub>S requires 278.0851.

**Procedures and characterization data for compounds 4 and 5**

**(-)-4-phenethyl-3,4-dihydrobenzo[e][1,2,3]oxathiazine 2,2-dioxide (4)**

A solution of **3aa** (23.09mg, 0.081 mmol) in absolute EtOH (7.5ml) is stirred under H<sub>2</sub> in the presence of Pd/CaCO<sub>3</sub> (5%) (10.5 mg) during 1h. Afterwards, the mixture is filtered over silica gel using EtOAc as eluent, and the solvent is removed under reduced pressure. Purification by flash chromatography on silica gel afforded compound **4** (98%).

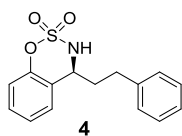

The enantiomeric excess (80%) was determined by chiral HPLC (Chiralpak ADH), hexane-*i*PrOH 80:20, 1 mL/min, major enantiomer *t<sub>r</sub>* = 10.55 min, minor enantiomer *t<sub>r</sub>* = 9.01 min.

Orange oil;  $[\alpha]_D^{20}$  -33.7 (*c* 1.0, CHCl<sub>3</sub>, 80% *ee*); **NMR <sup>1</sup>H (300 MHz, CDCl<sub>3</sub>)** δ 7.36 (m, 3H), 7.26-7.23 (m, 3H), 7.18-7.16 (m, 2H), 7.02-6.99 (m, 1H), 4.73-4.64 (m, 2H), 2.97 (ddd, *J* = 13.5, 7.6, 5.7 Hz, 1H), 2.81 (dt, *J* = 13.9, 8.3 Hz, 1H), 2.42-2.34 (m, 2H); **<sup>13</sup>C (75.5 MHz, CDCl<sub>3</sub>)** δ 151.18 (C), 140.3 (C), 129.4 (CH), 128.8 (CH), 128.5 (CH), 126.5 (CH), 126.3 (CH), 125.3 (CH), 122.5 (C), 118.9 (CH), 56.6 (CH), 35.6 (CH), 31.3 (CH); **HRMS (ESI)** *m/z*: 307.1113 [M + NH<sub>4</sub>]<sup>+</sup>; C<sub>15</sub>H<sub>19</sub>N<sub>2</sub>O<sub>3</sub>S requires 307.1116.

**tert-butyl (-)-(1-(2-hydroxyphenyl)-3-phenylpropyl)carbamate (5)**

To a solution of the cyclic sulfamate **4** (0.08 mmol, 23 mg) in THF (1 ml), LiAlH<sub>4</sub> (1.0 M in THF, 3,3 equivalents, 0.264 mmol, 0.26 ml) was added dropwise at r.t. over 4 min. The mixture was heated to 60°C for 2,5 hours, allowed to cool down to r.t., and then

cooled with an ice bath. The reaction was quenched with EtOAc (1 ml), followed by the addition of EtOH (1 ml) and H<sub>2</sub>O (1 ml). To the resulting turbid mixture Boc<sub>2</sub>O (3 equivalents, 52 mg, 0.24 mmol) was added in one portion and the resulting mixture was stirred at r.t. for 1 hour. The mixture was diluted with EtOAc (15 ml) and acidified with aq 2 M HCl until the aqueous layer became clear. The aqueous layer was then separated and extracted with EtOAc (2 x 15 ml). The combined organic layers were dried (MgSO<sub>4</sub>), filtered, and concentrated in vacuo. Purification of the residue by flash chromatography afforded compound **5**.<sup>2</sup>

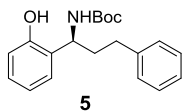

The enantiomeric excess (80%) was determined by chiral HPLC (Chiralpak ADH), hexane-*i*PrOH 90:10, 1 mL/min, major enantiomer  $t_r$  = 8.11 min, minor enantiomer  $t_r$  = 10.23 min.

Yellow solid;  $[\alpha]_D^{20}$  -31.7 (*c* 1.0, CHCl<sub>3</sub>, 80% *ee*); NMR <sup>1</sup>H (300 MHz, CDCl<sub>3</sub>) δ 8.38 (s, 1H), 7.31 – 7.25 (m, 2H), 7.20 (t, *J* = 7.3 Hz, 1H), 7.20 – 7.13 (m, 4H), 6.95 – 6.91 (m, 1H), 6.88 (td, *J* = 7.5, 1.3 Hz, 1H), 5.02 (s, 1H), 4.81 (s, 1H), 2.77 – 2.60 (m, 2H), 2.26 – 2.16 (m, 2H), 1.44 (s, 9H); <sup>13</sup>C (75.5 MHz, CDCl<sub>3</sub>) δ 157.4 8 (C), 156.1 (C), 141.1 (C), 128.9 (CH), 128.5 (CH), 128.4 (CH), 126.1 (C), 120.3 (CH), 80.9 (C), 35.6 (CH<sub>2</sub>), 33.0 (CH<sub>2</sub>), 28.3 (CH<sub>3</sub>); 211.1120 [M - H]<sup>-</sup>, C<sub>15</sub>H<sub>15</sub>O requires 211.1123.

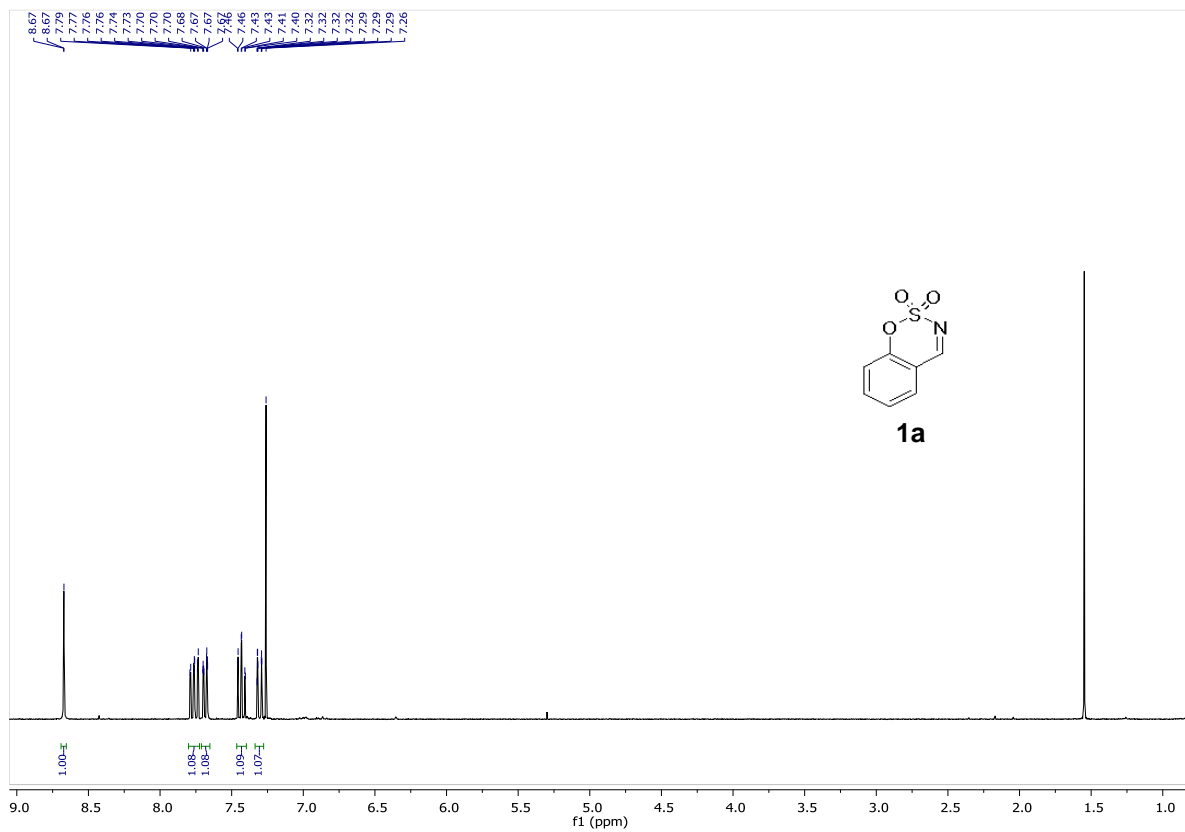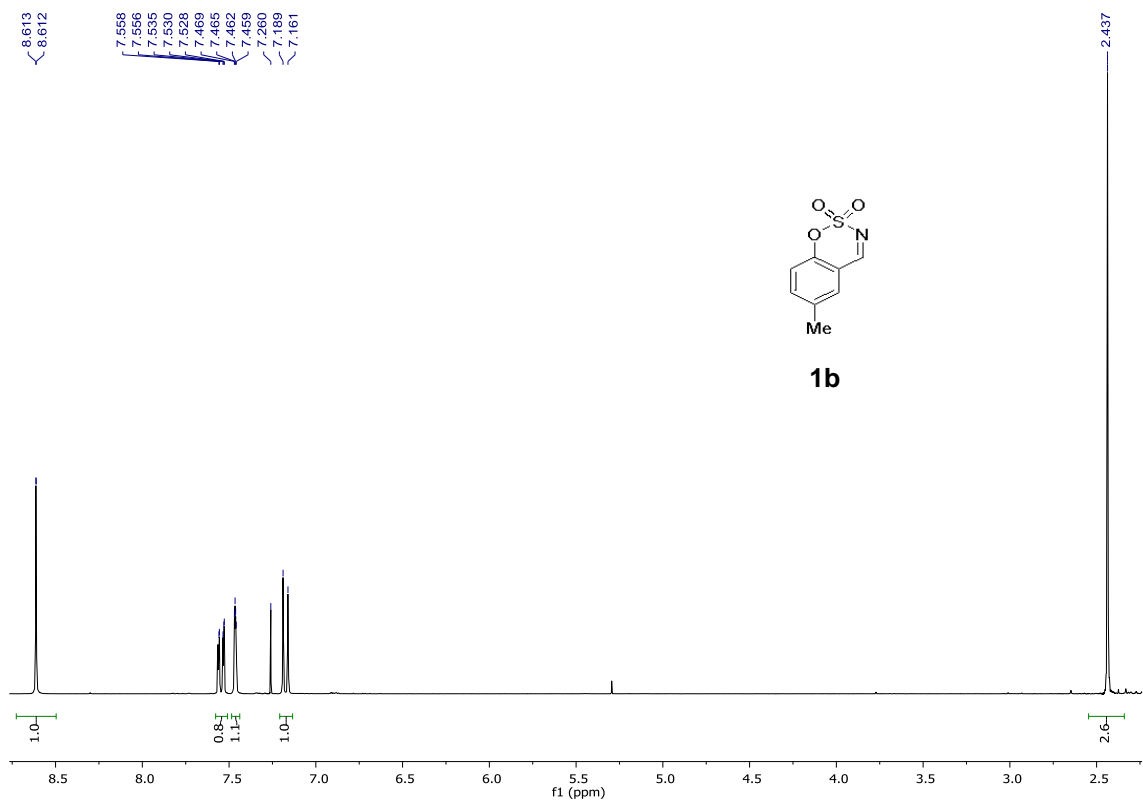

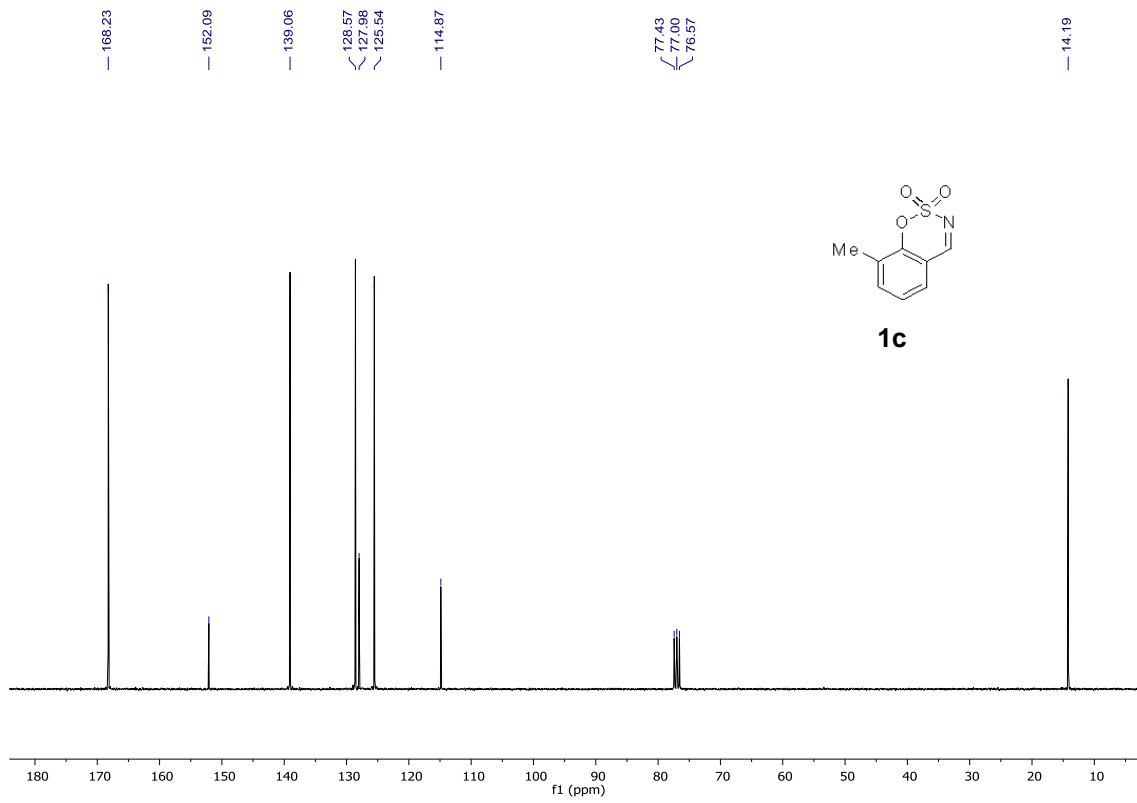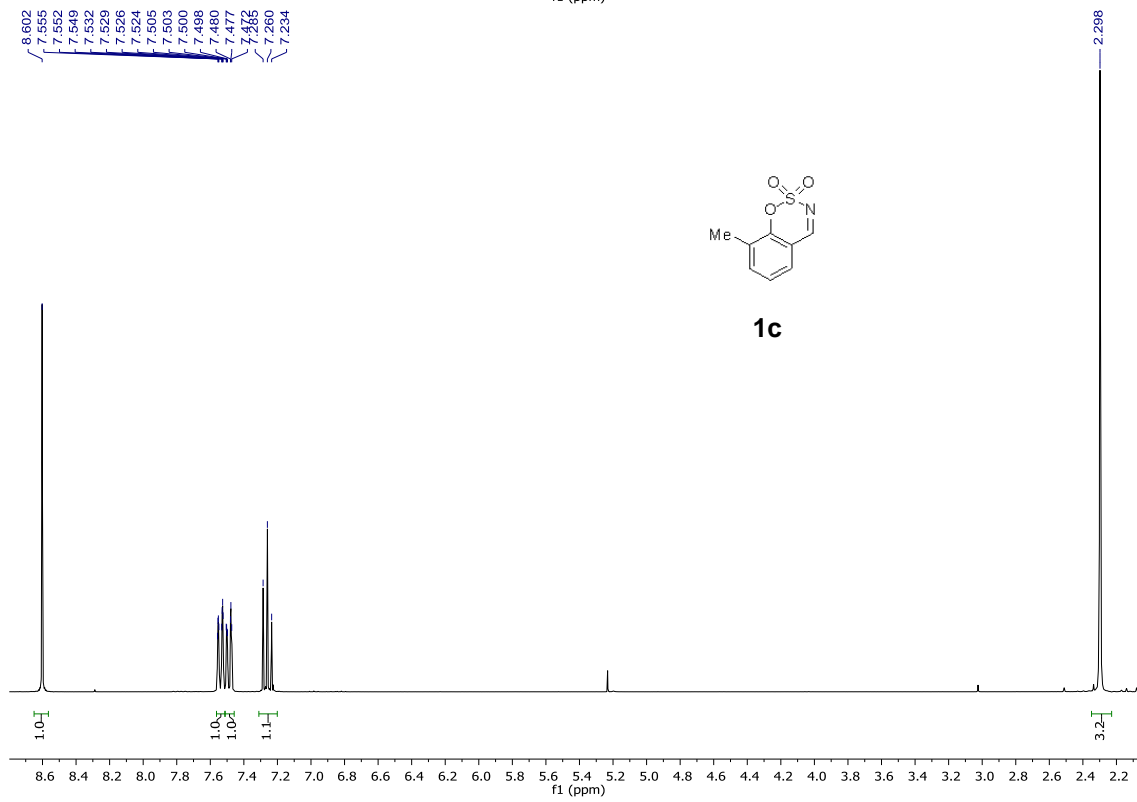

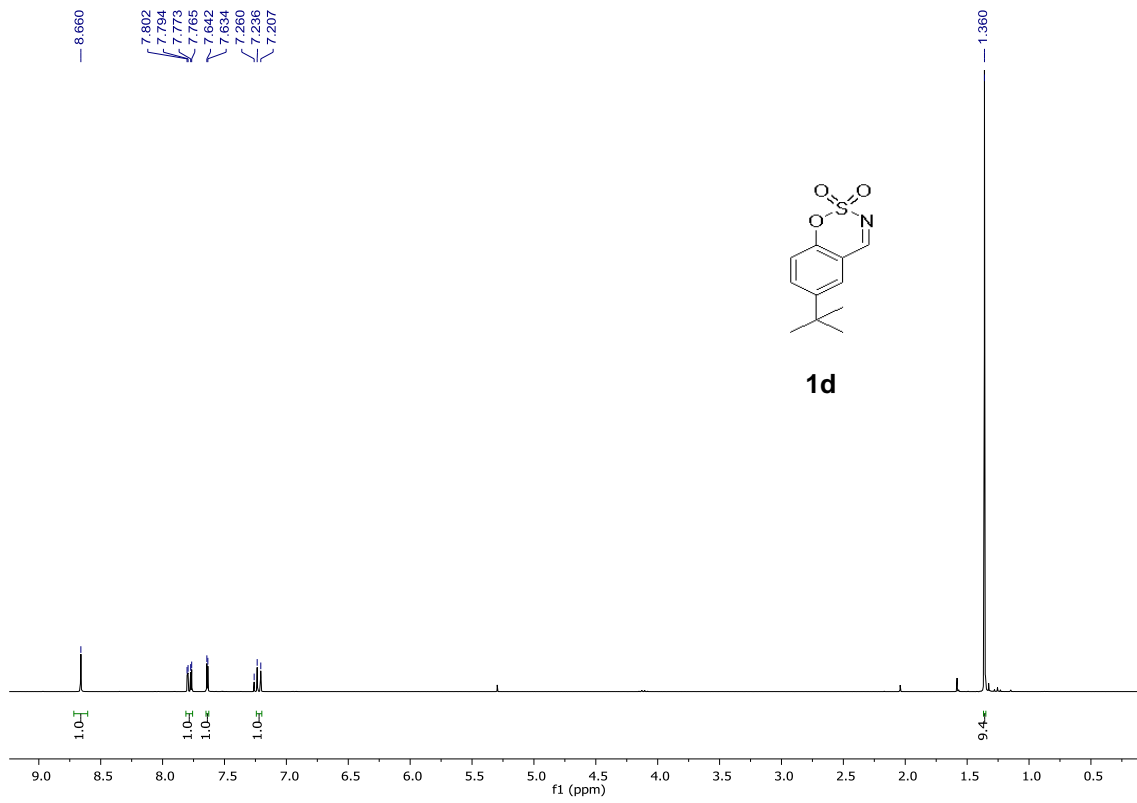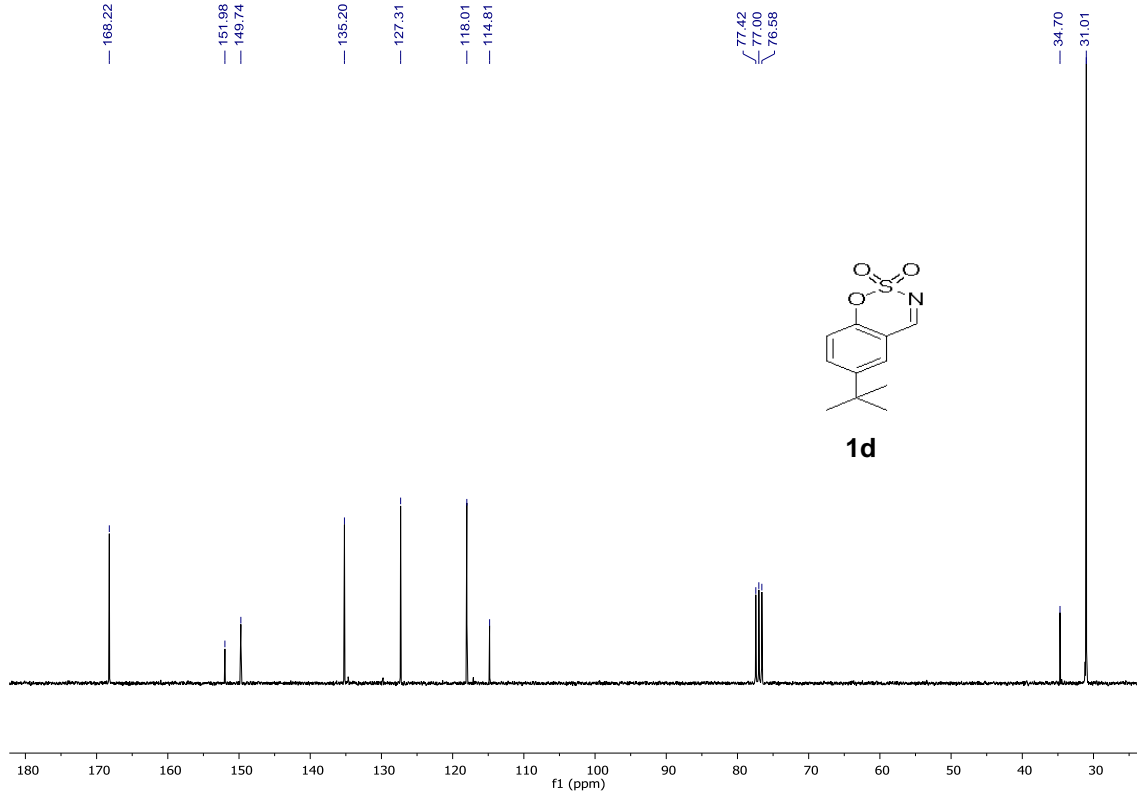



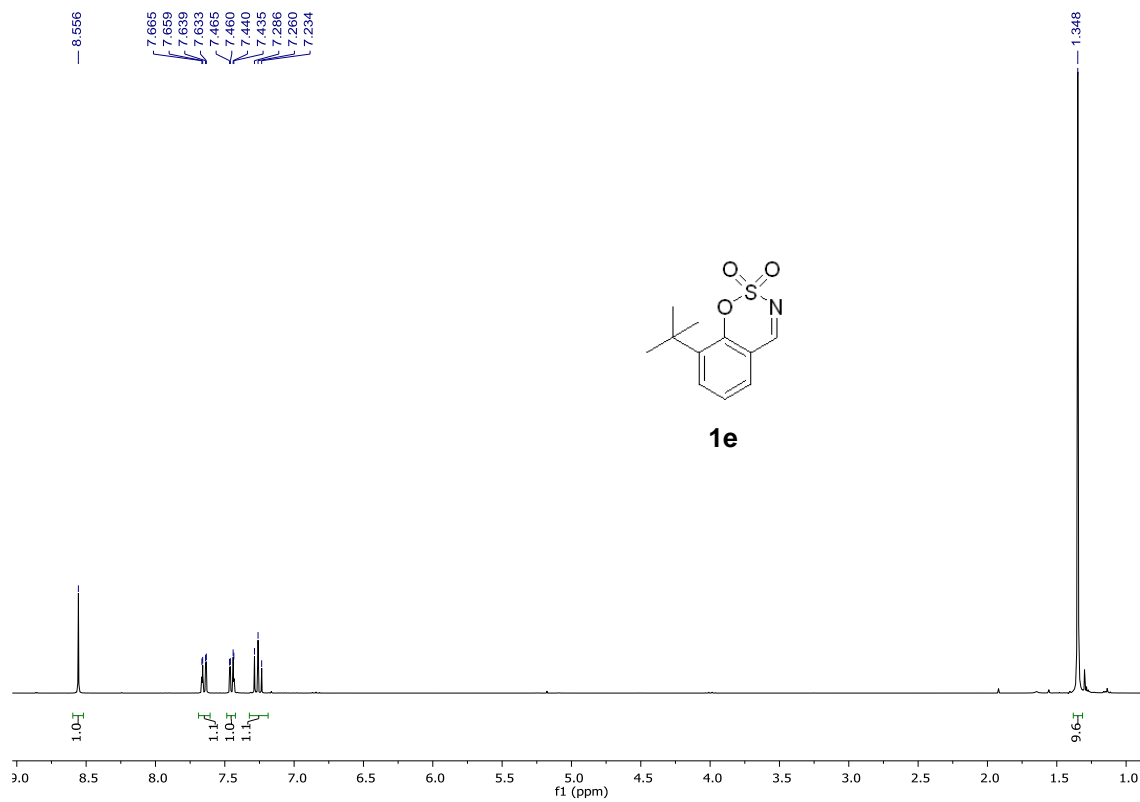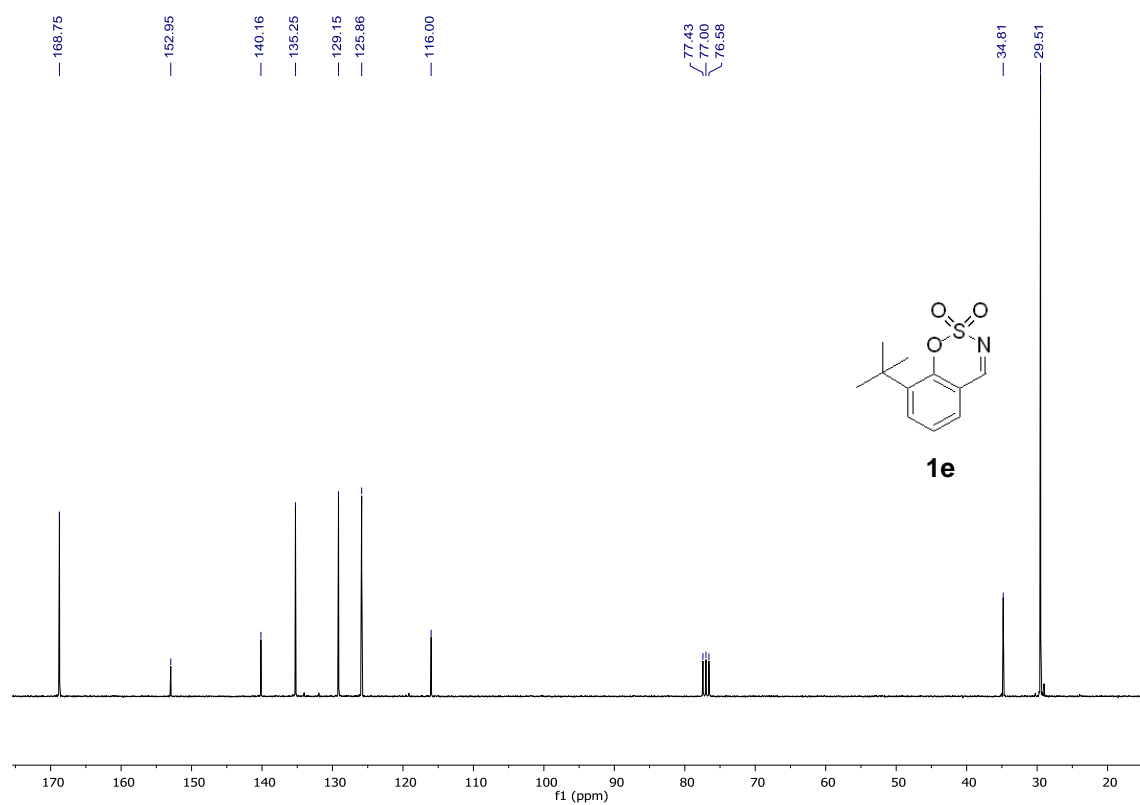

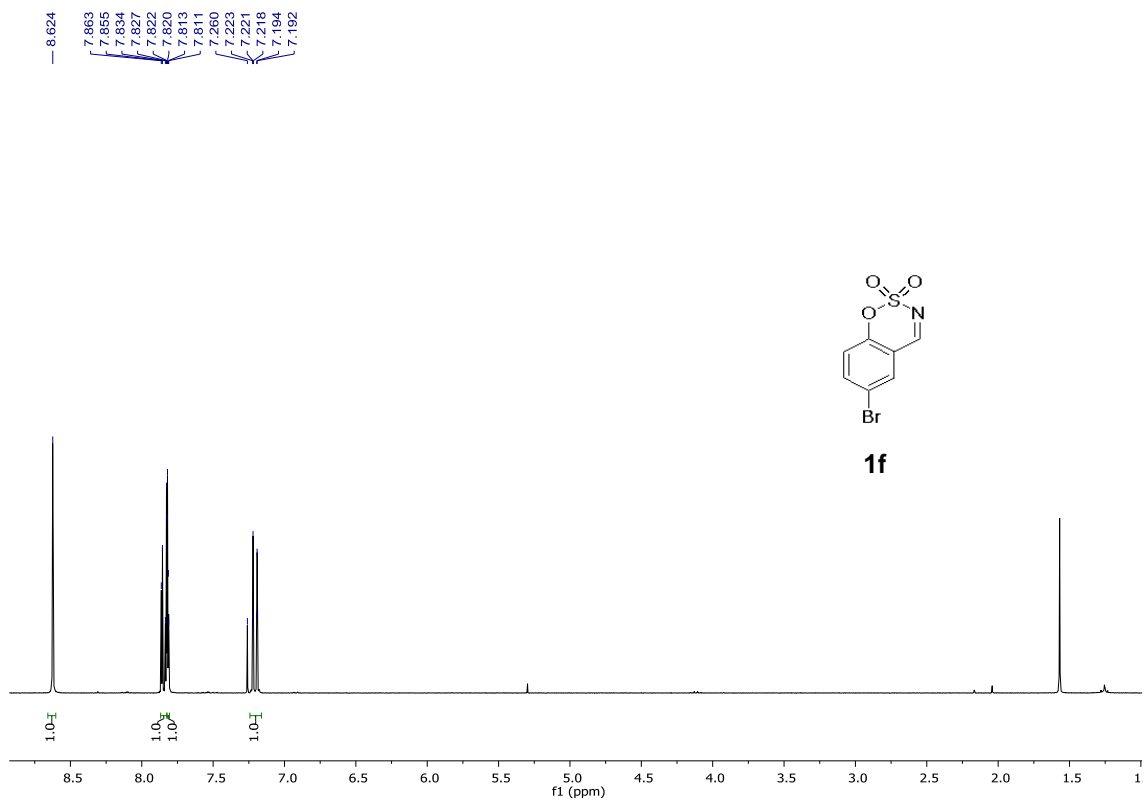

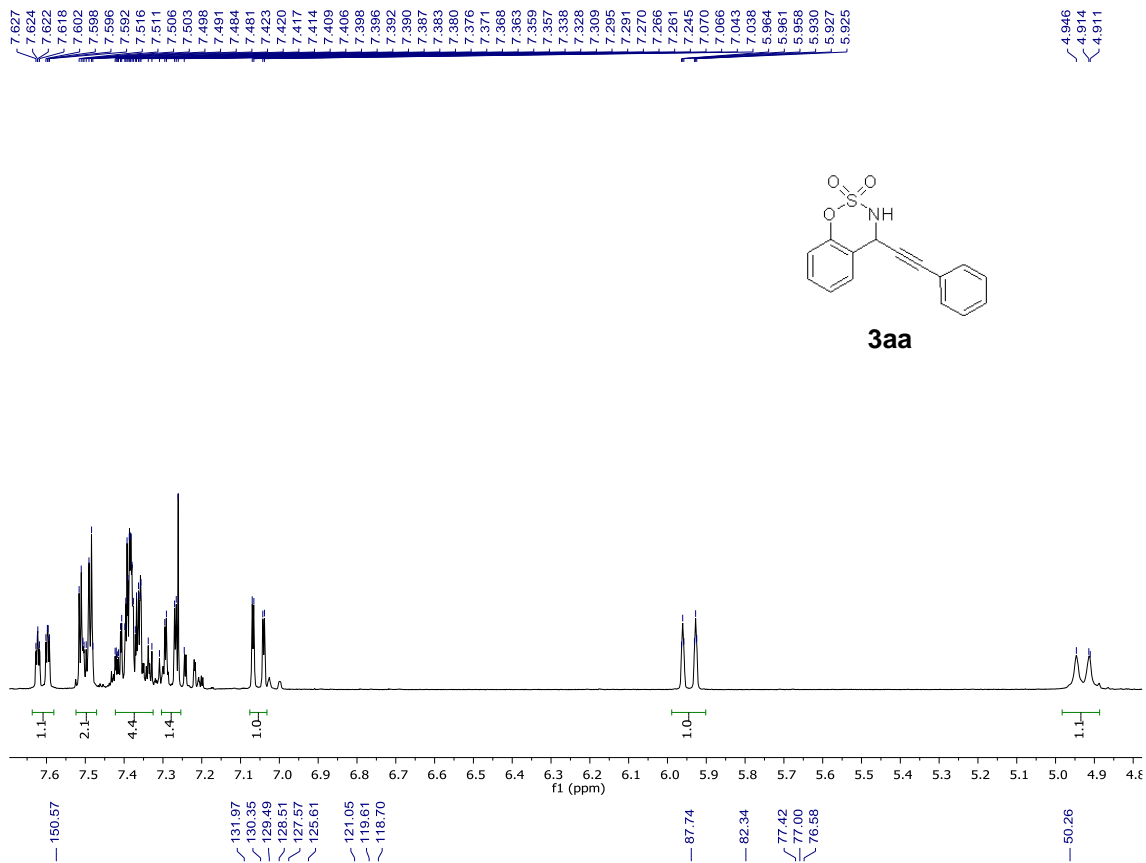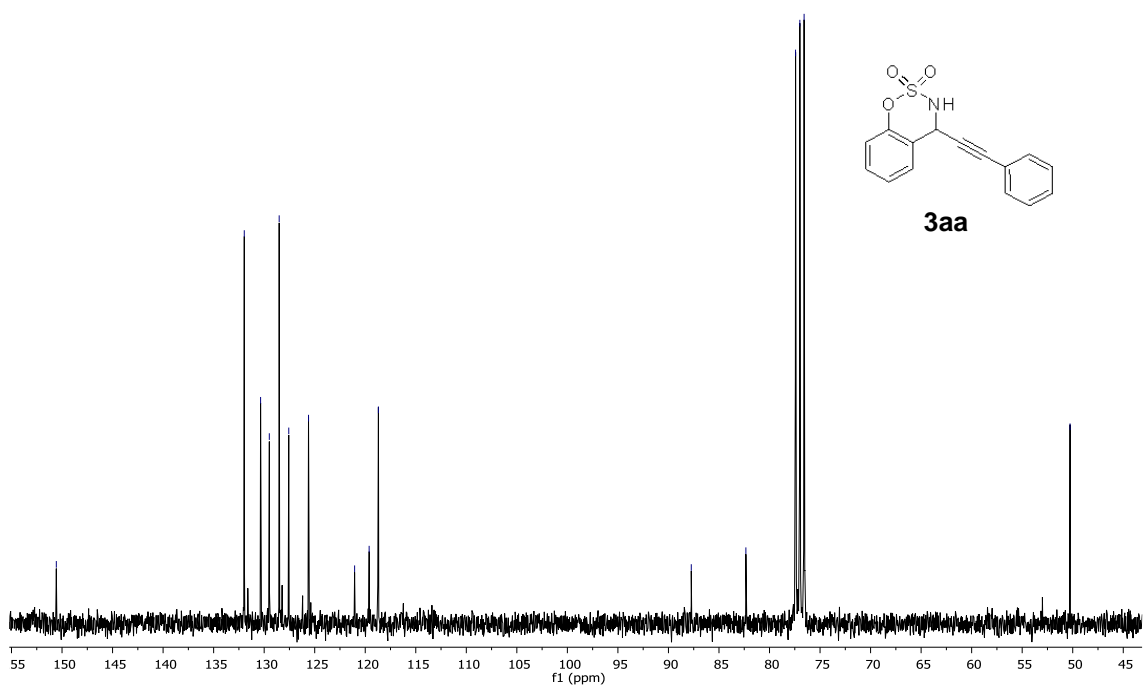

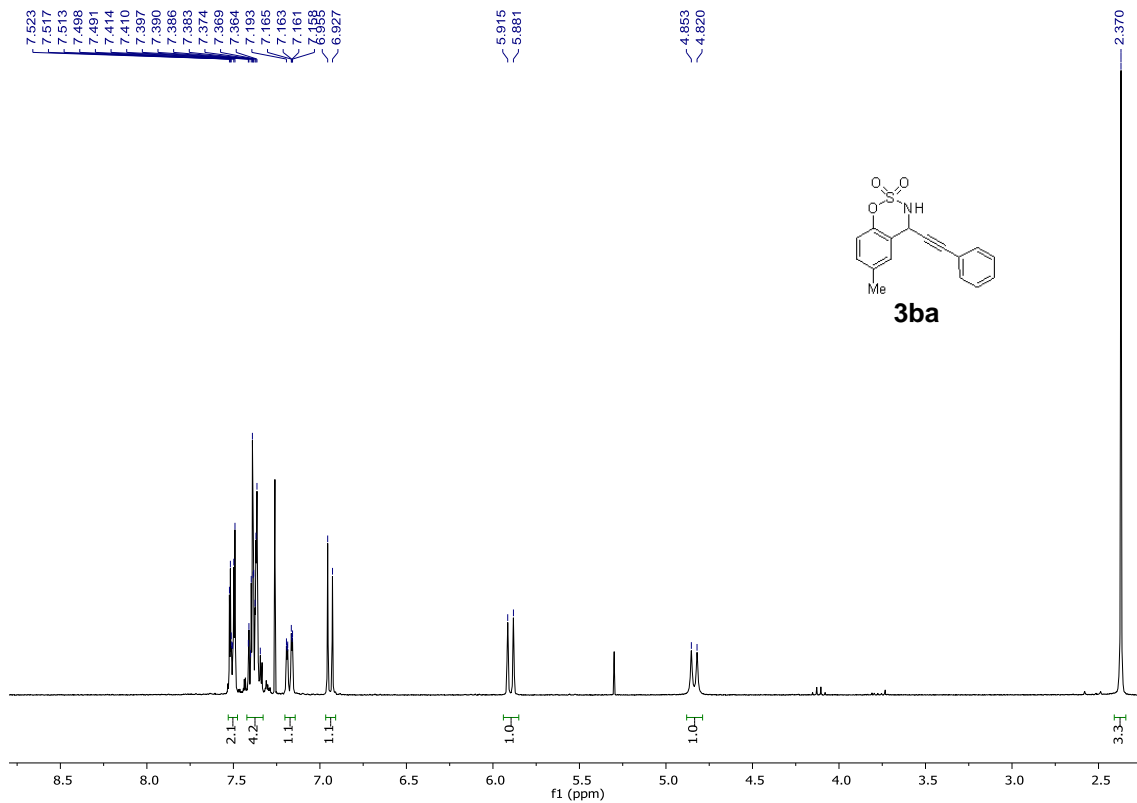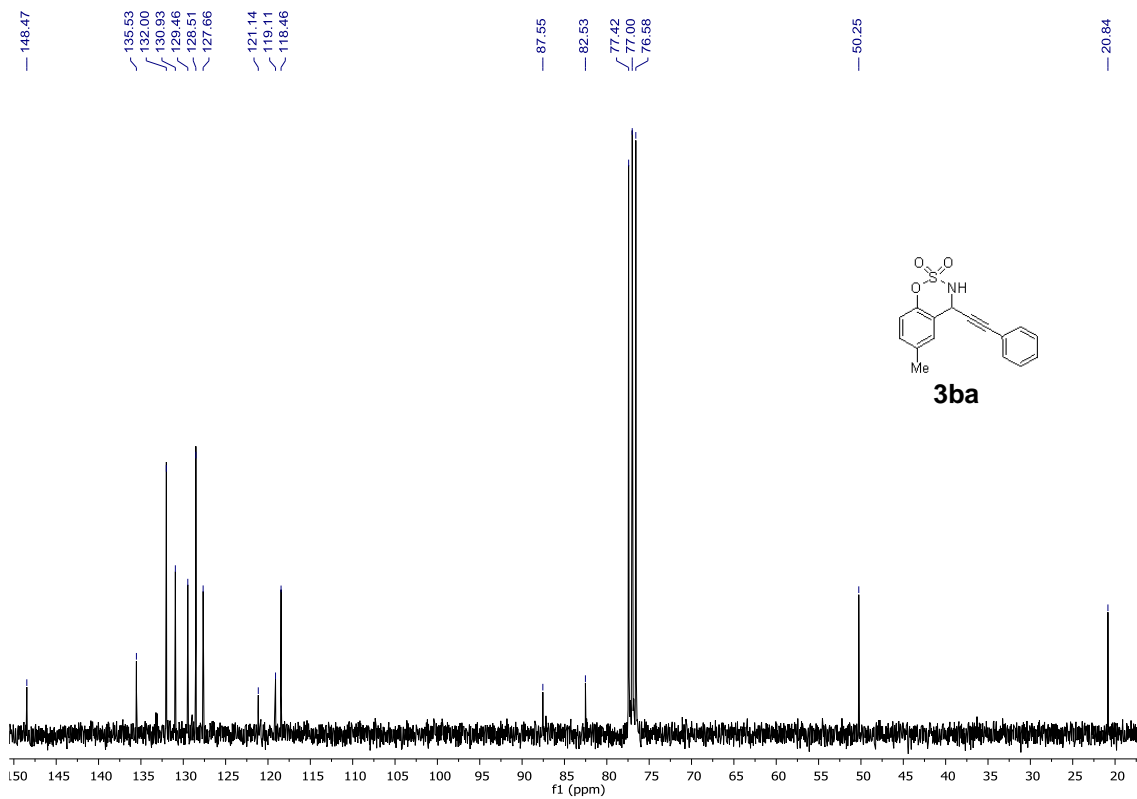

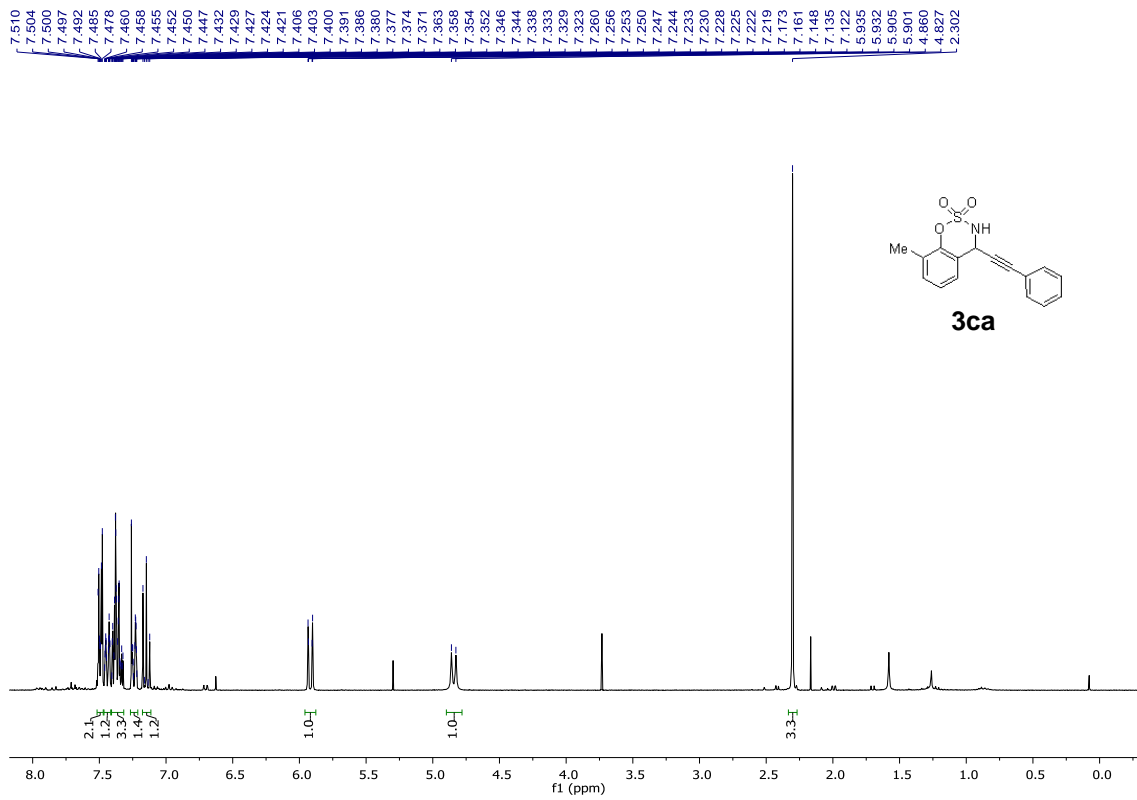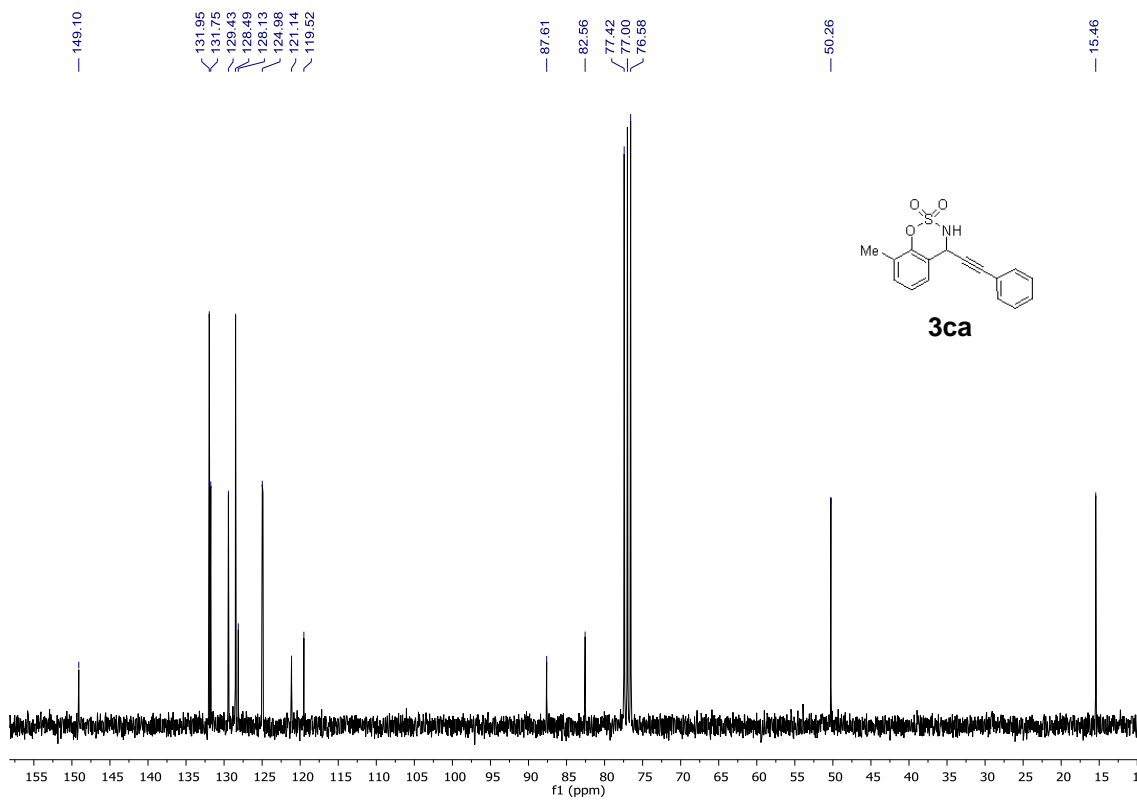

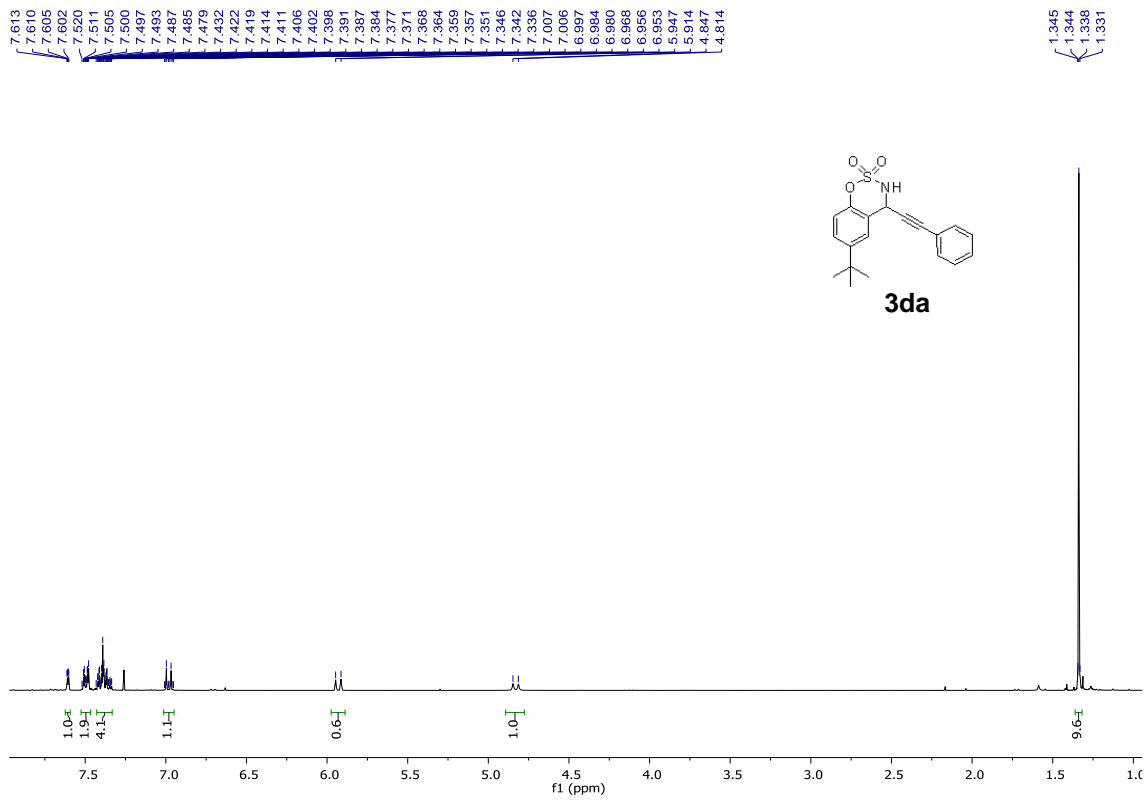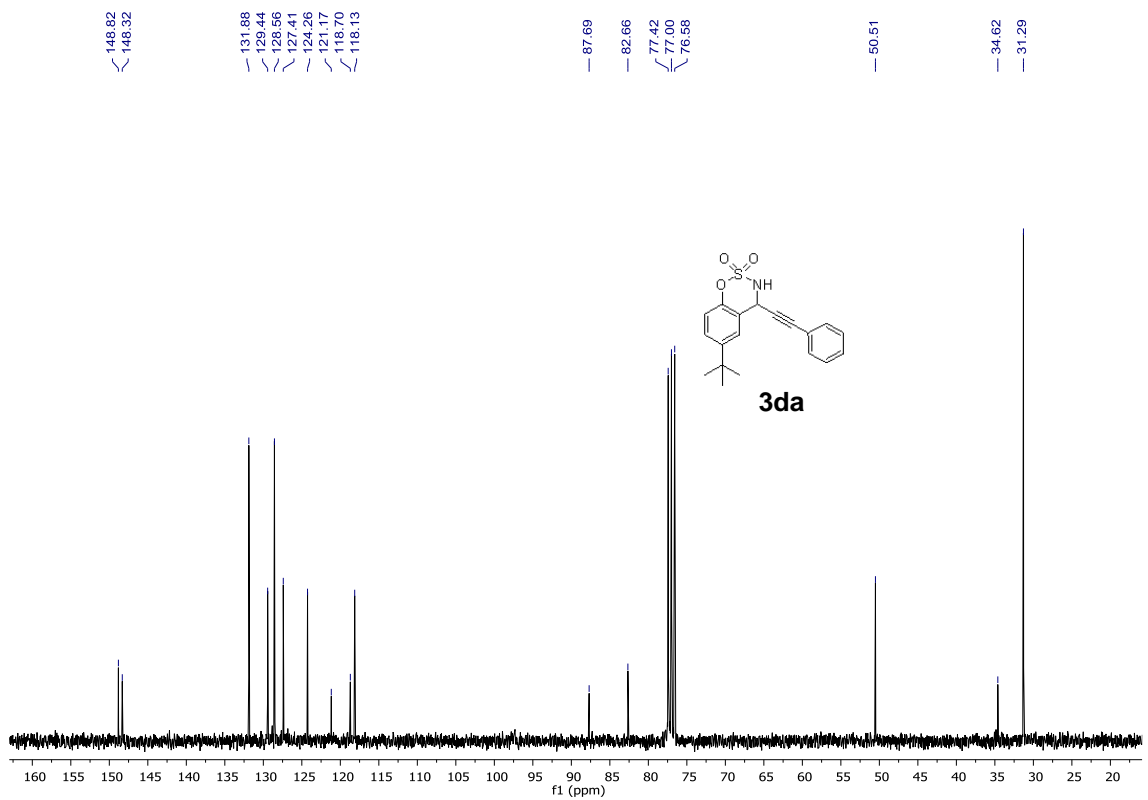

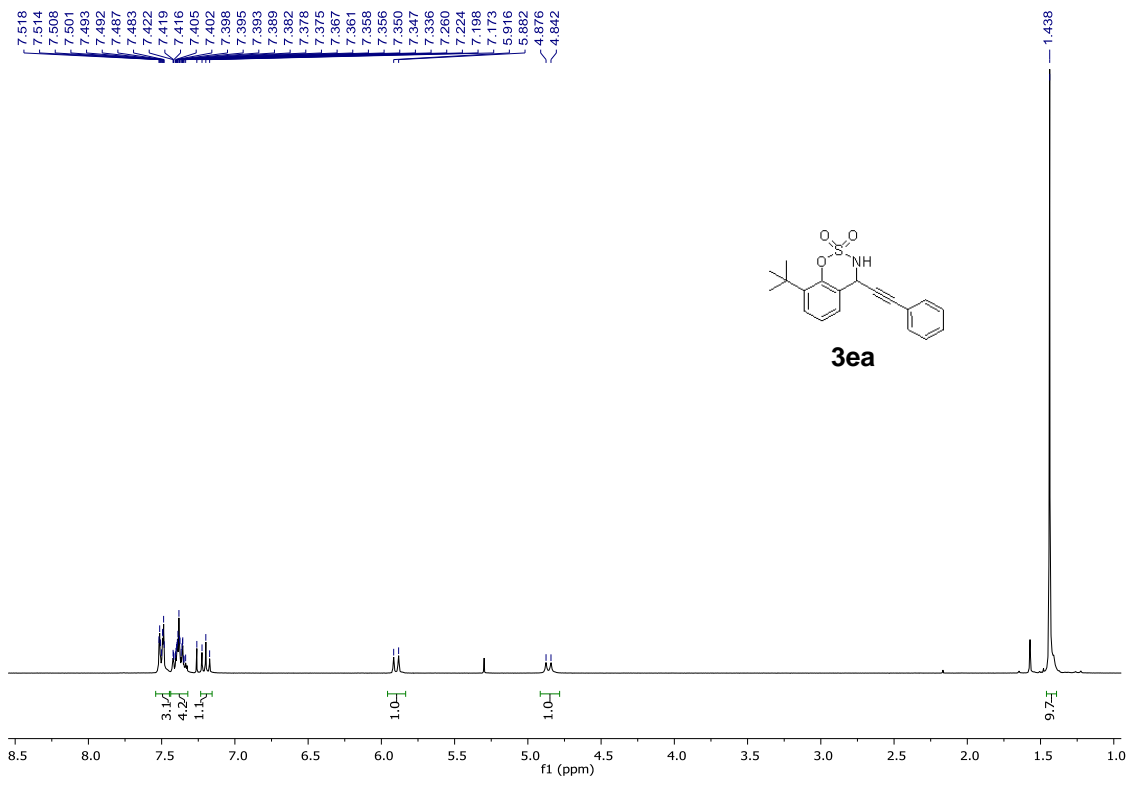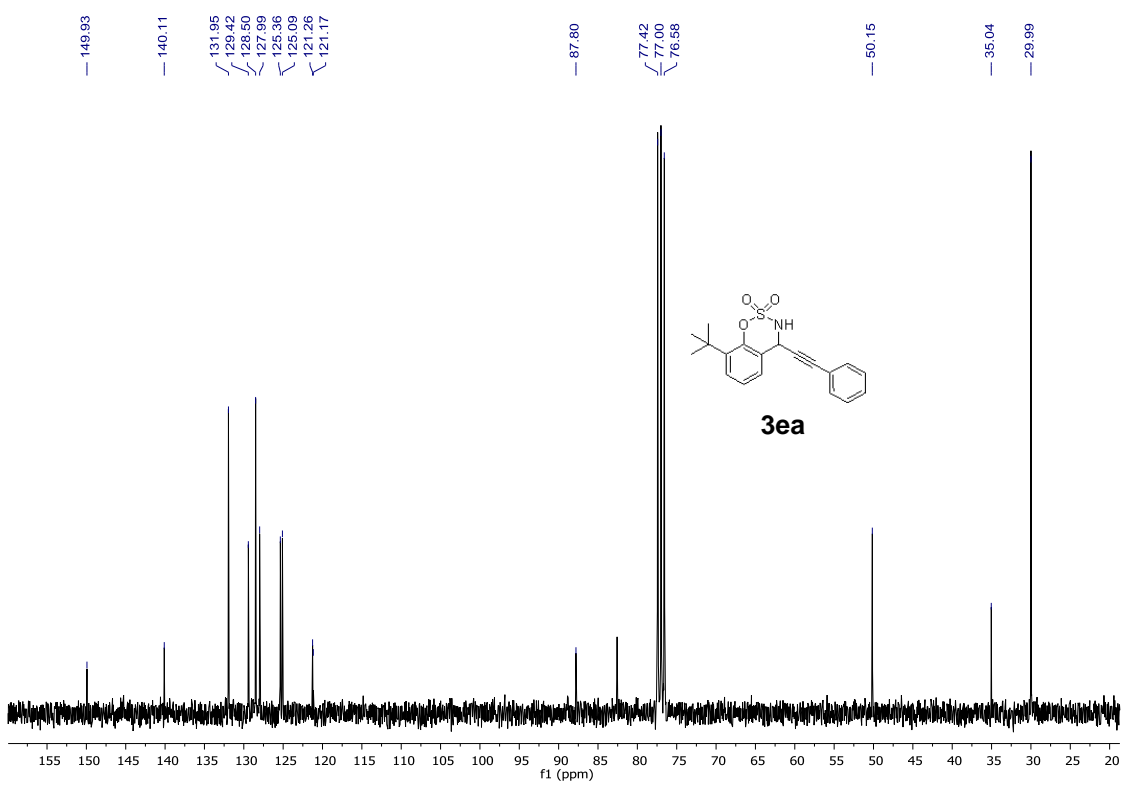

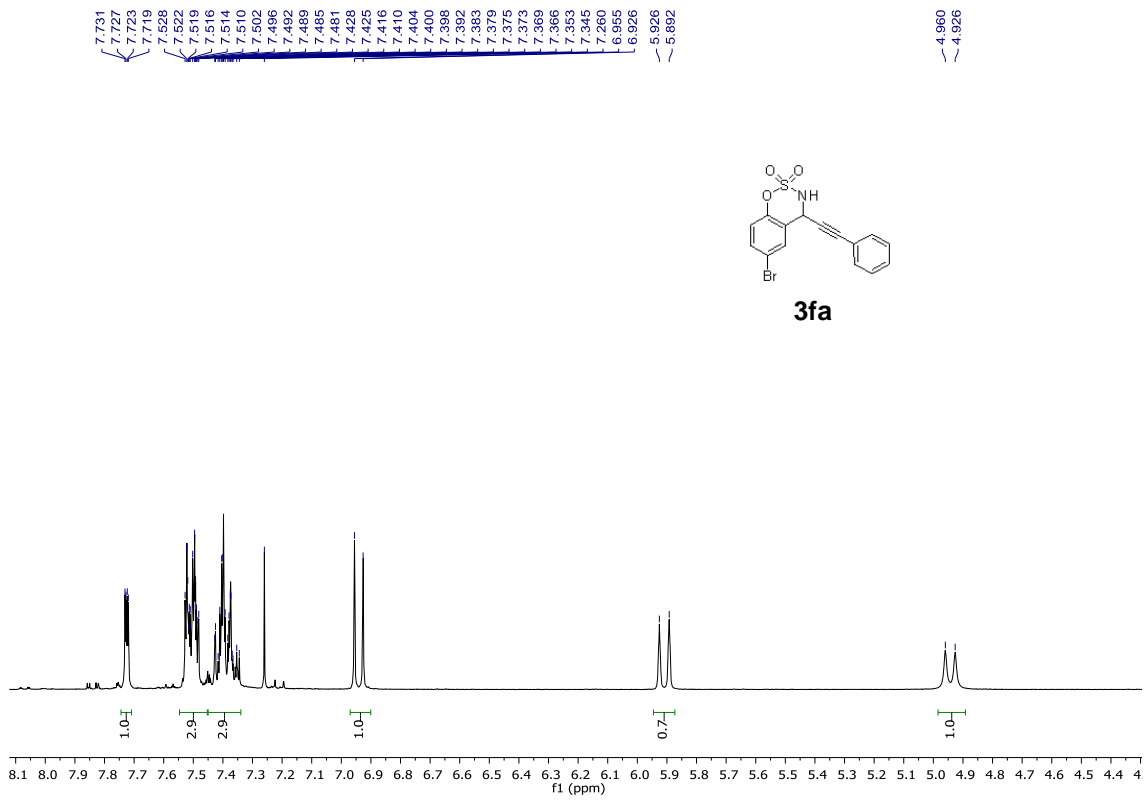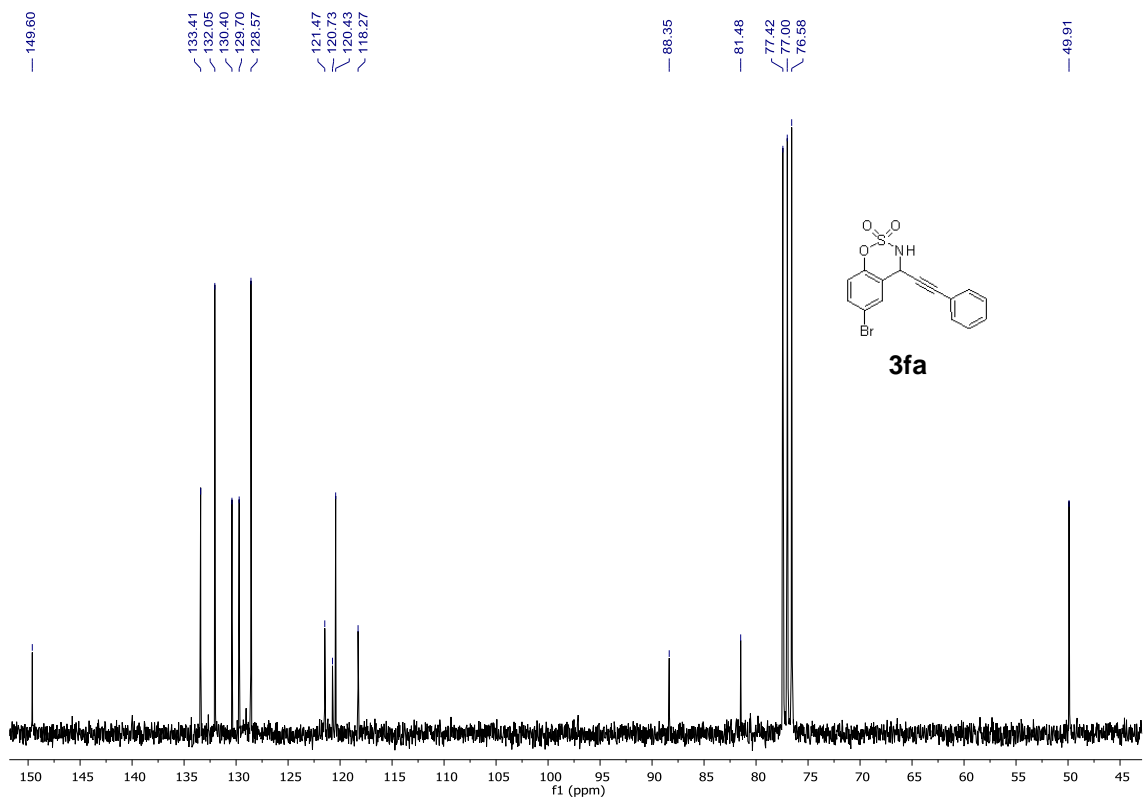



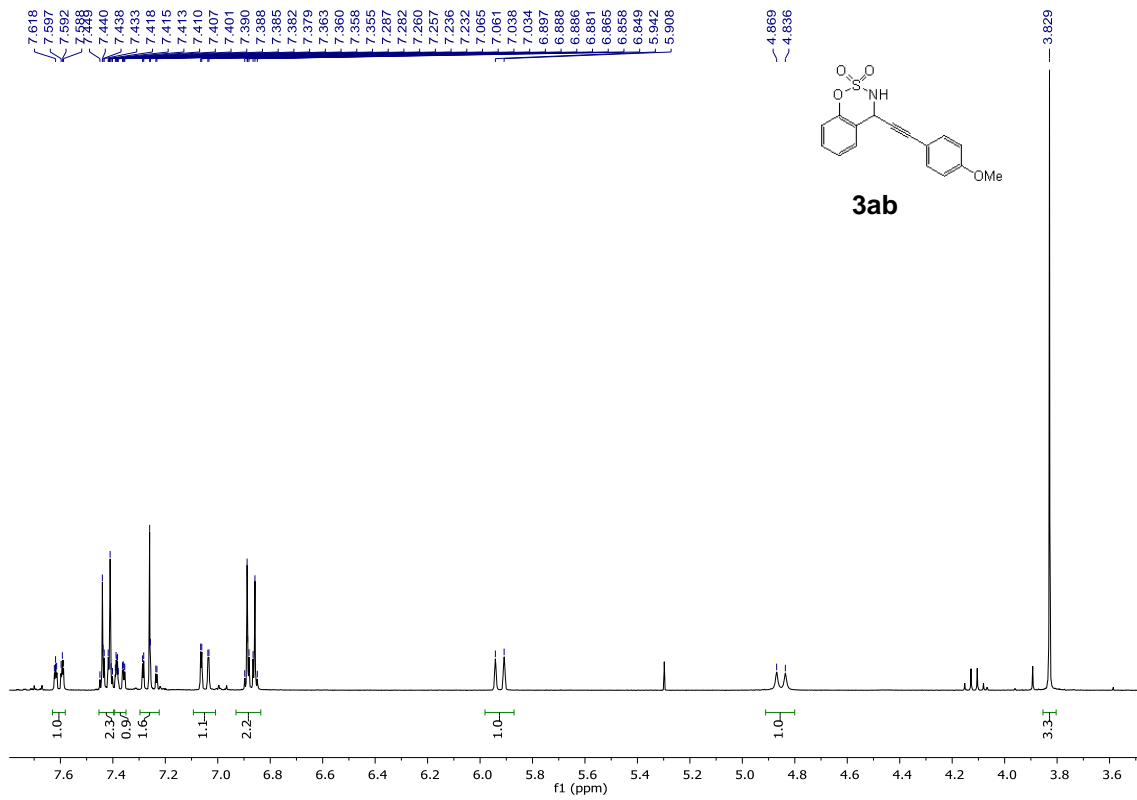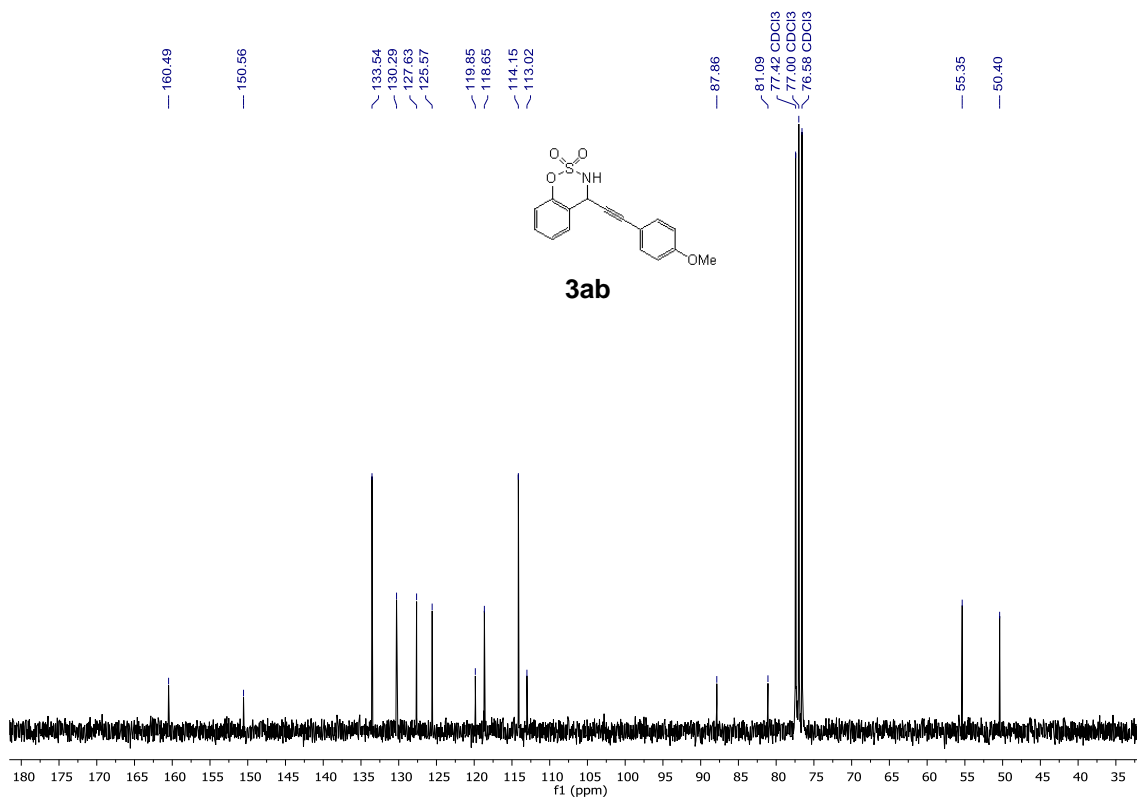

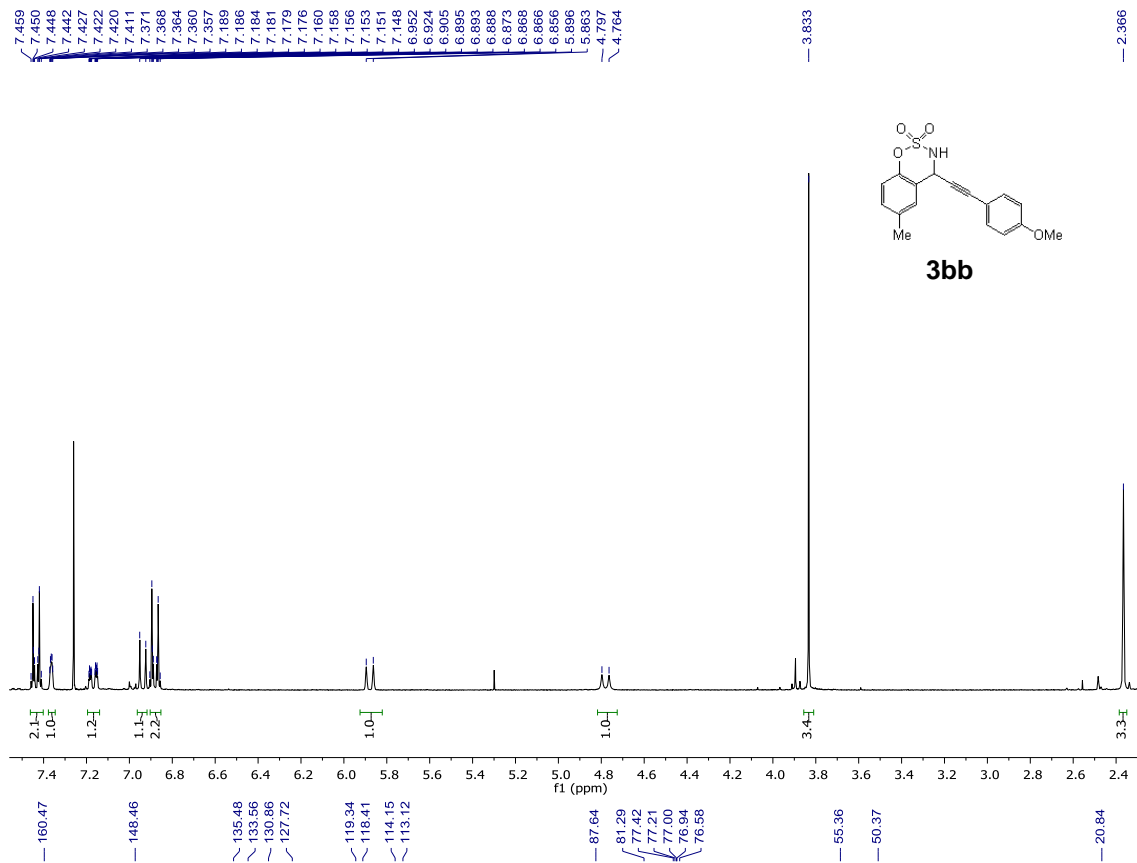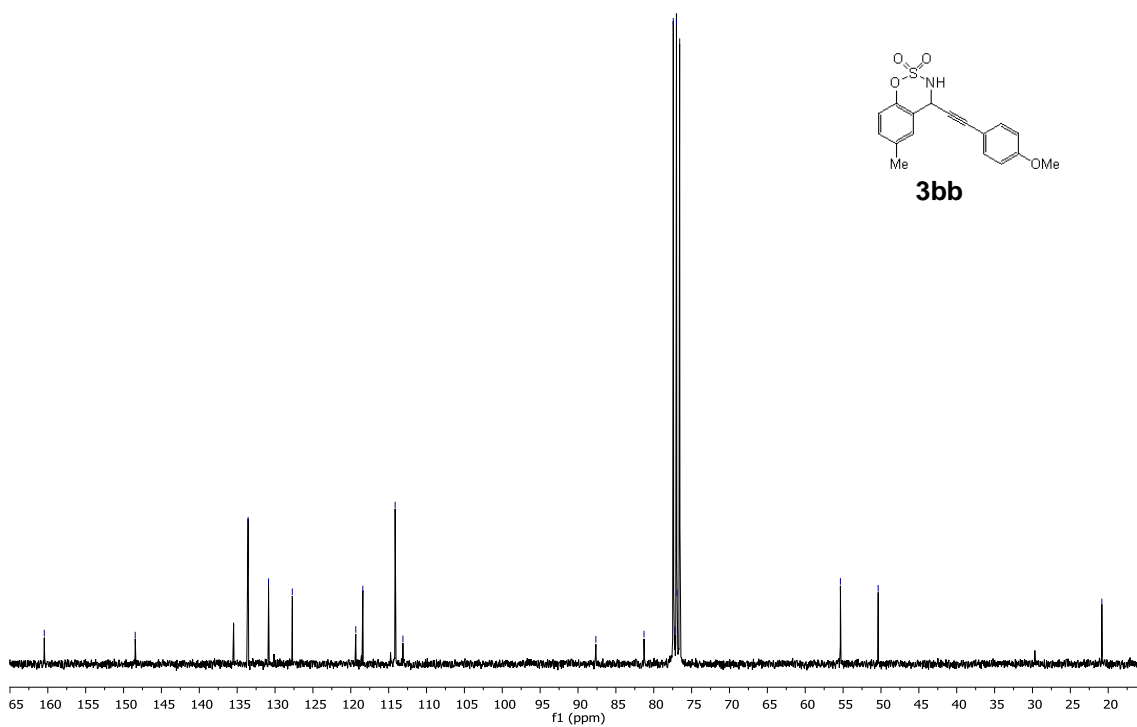

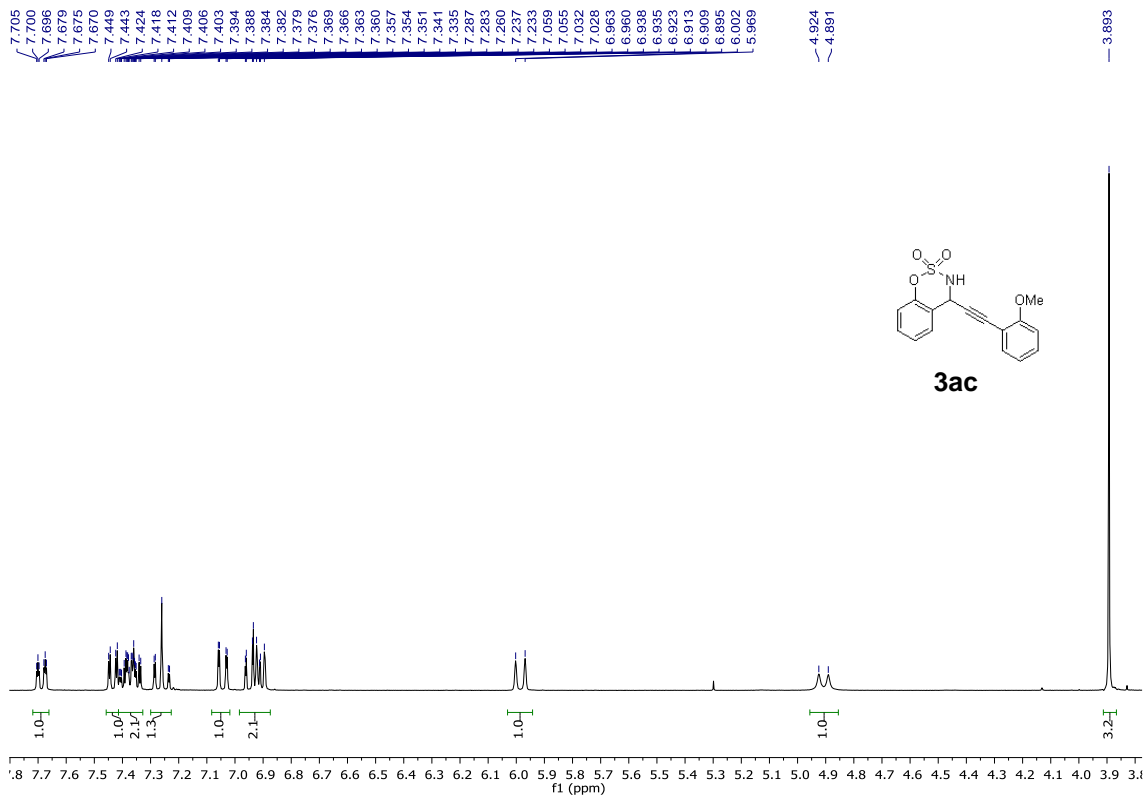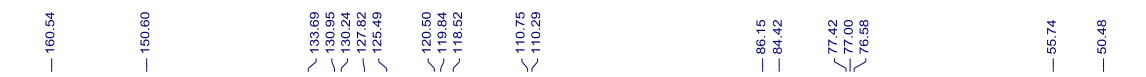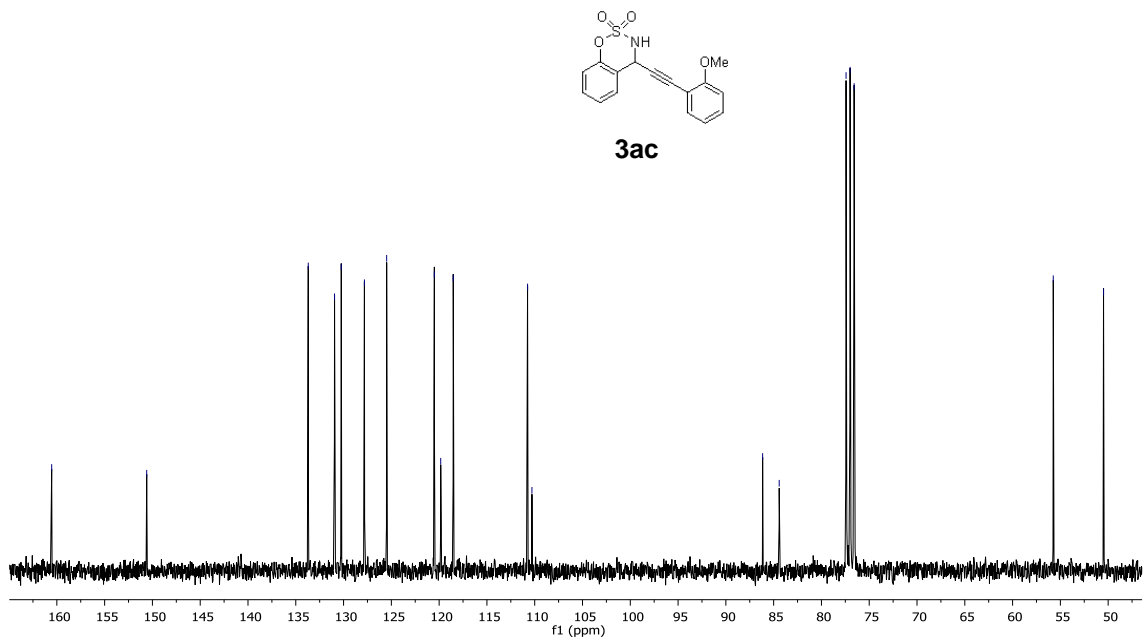

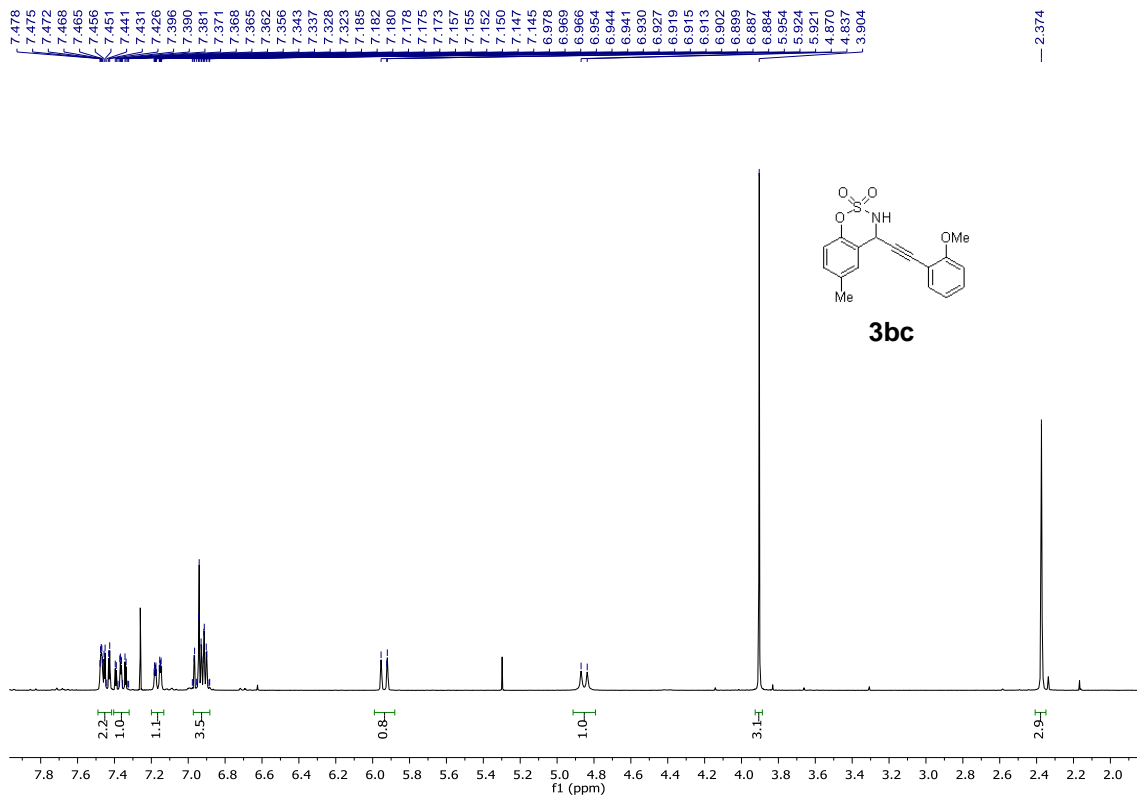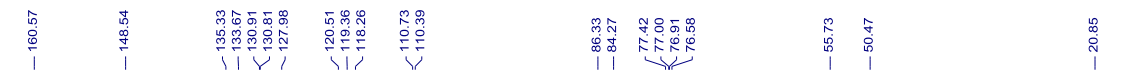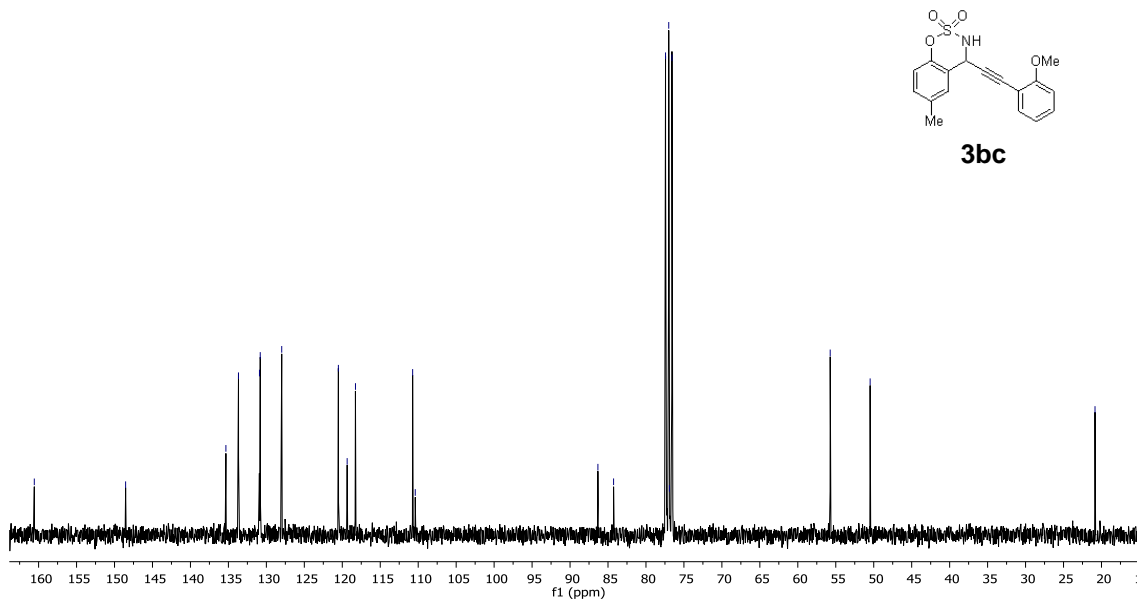

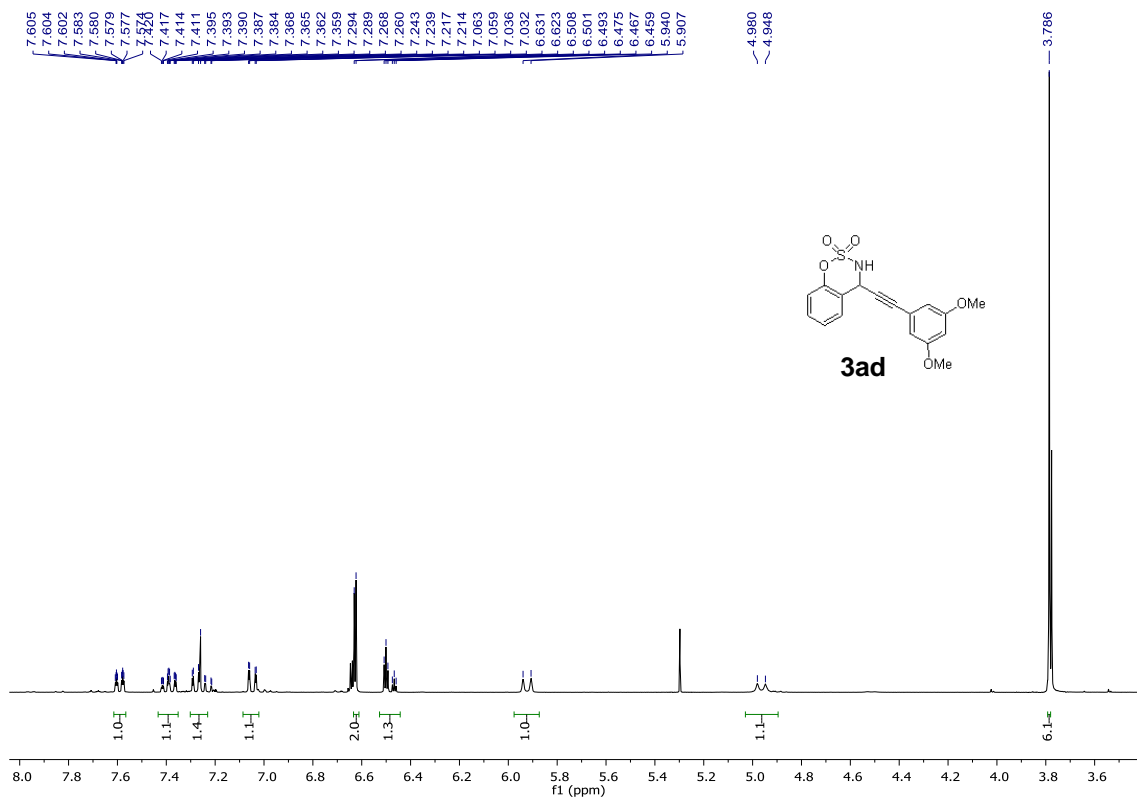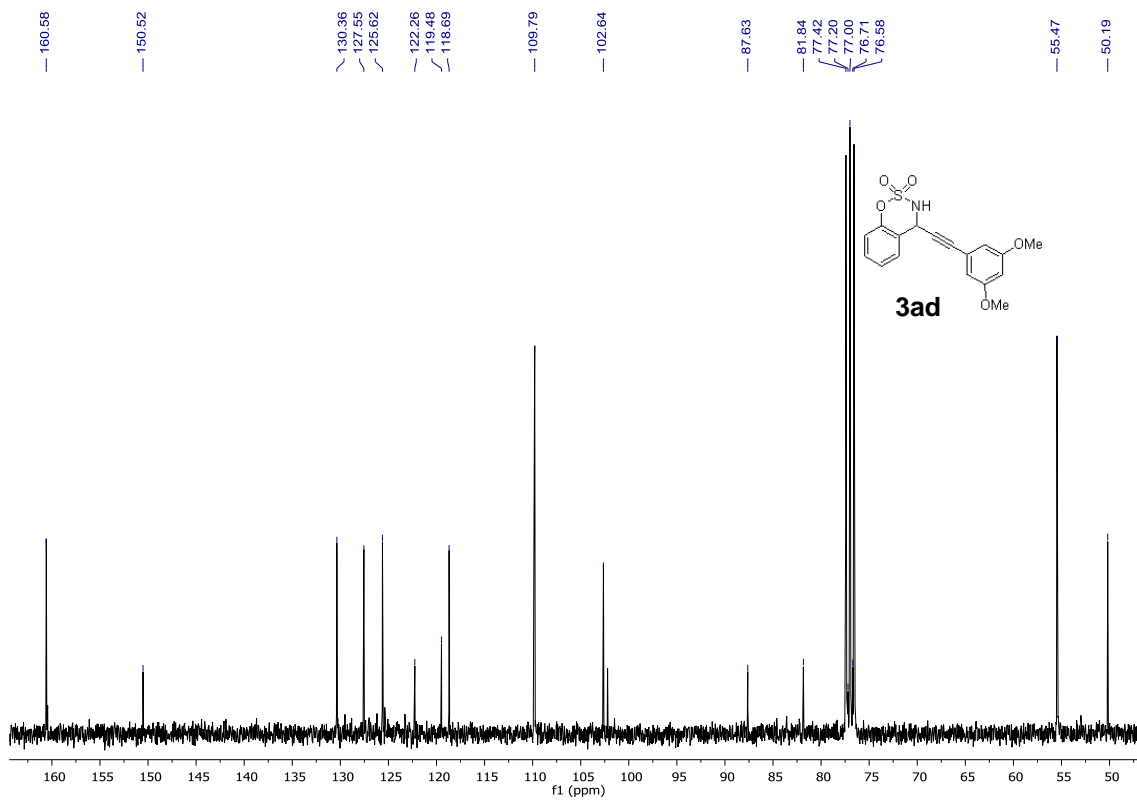

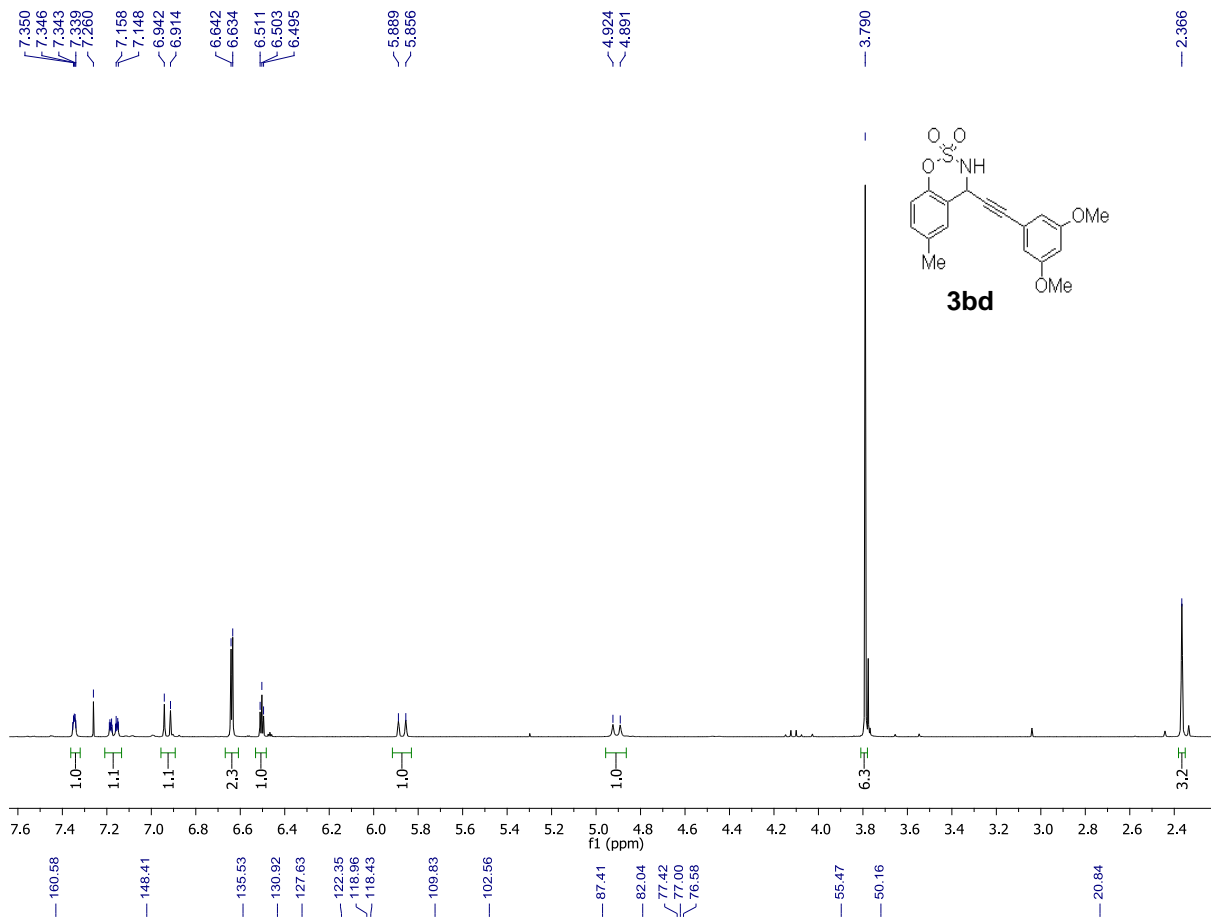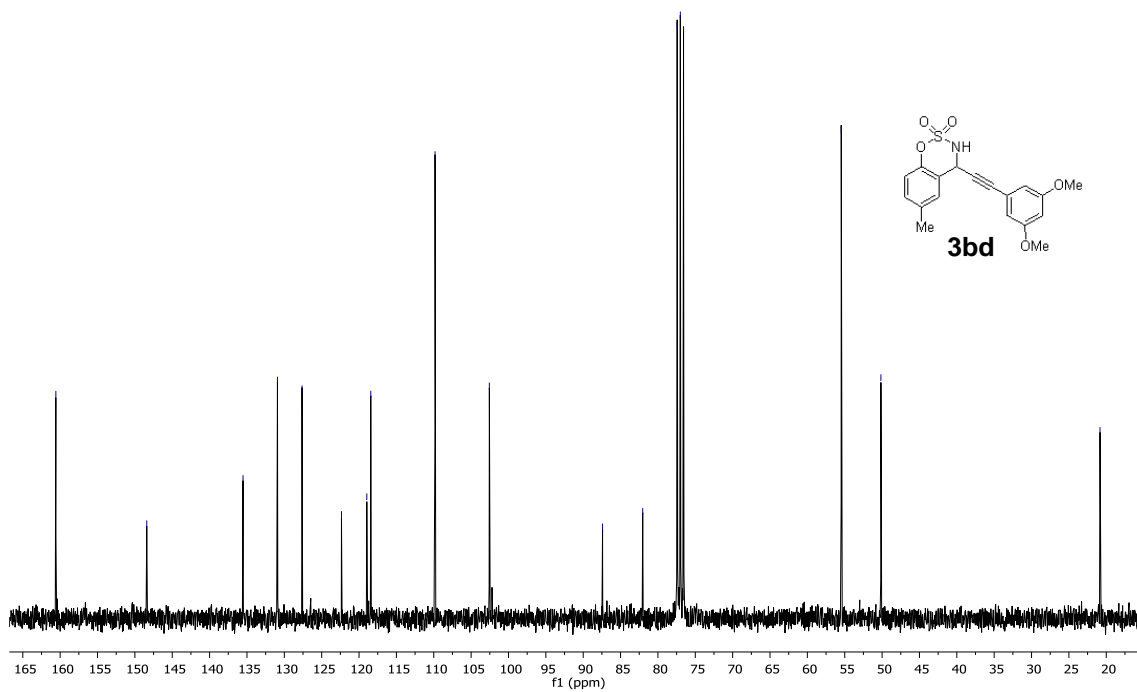

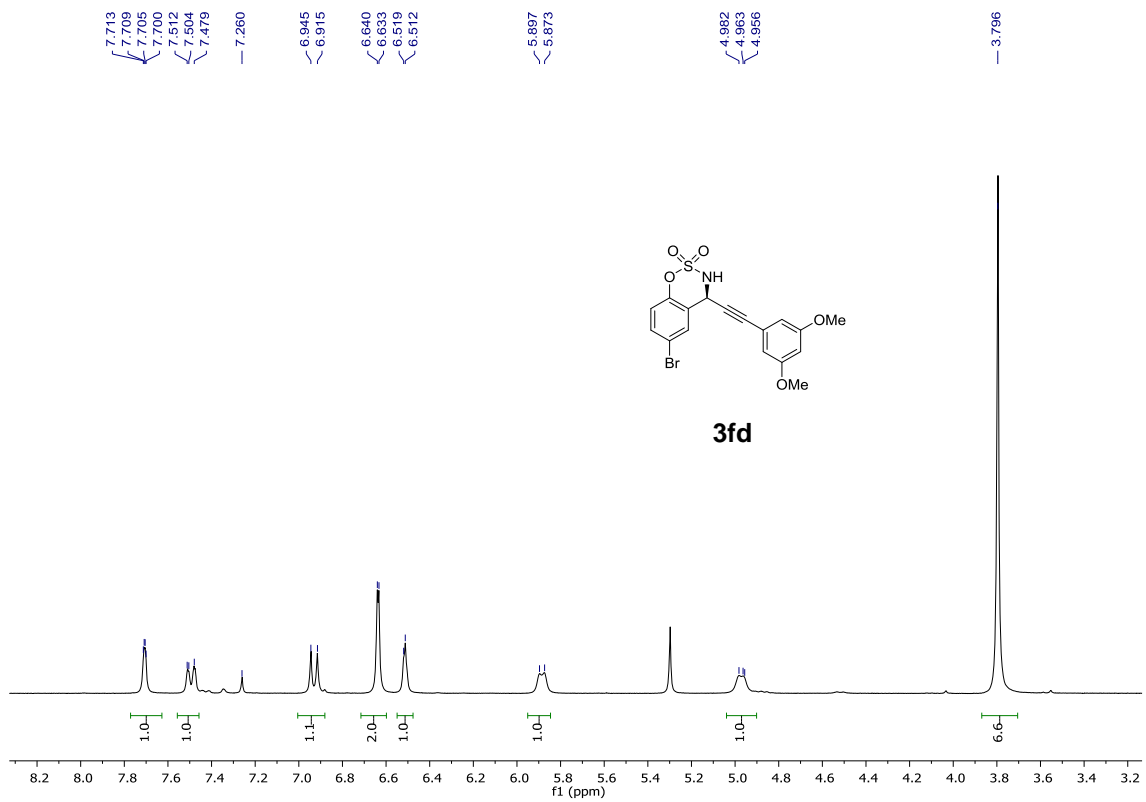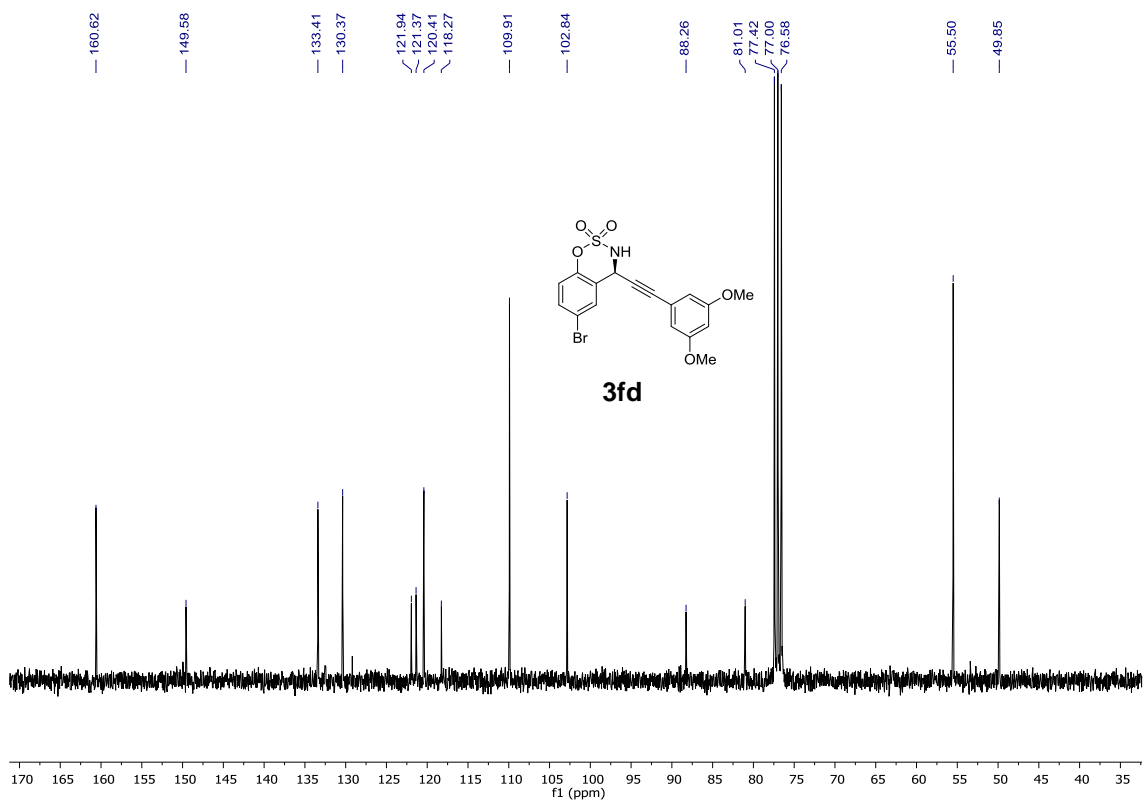

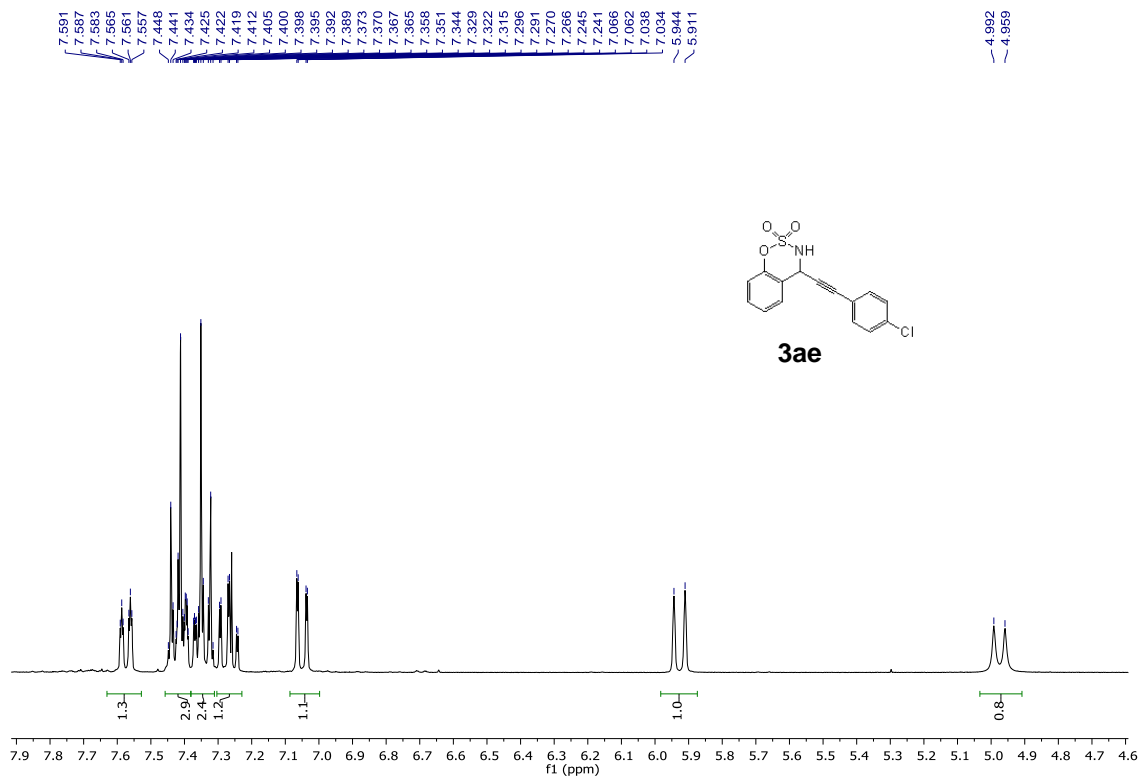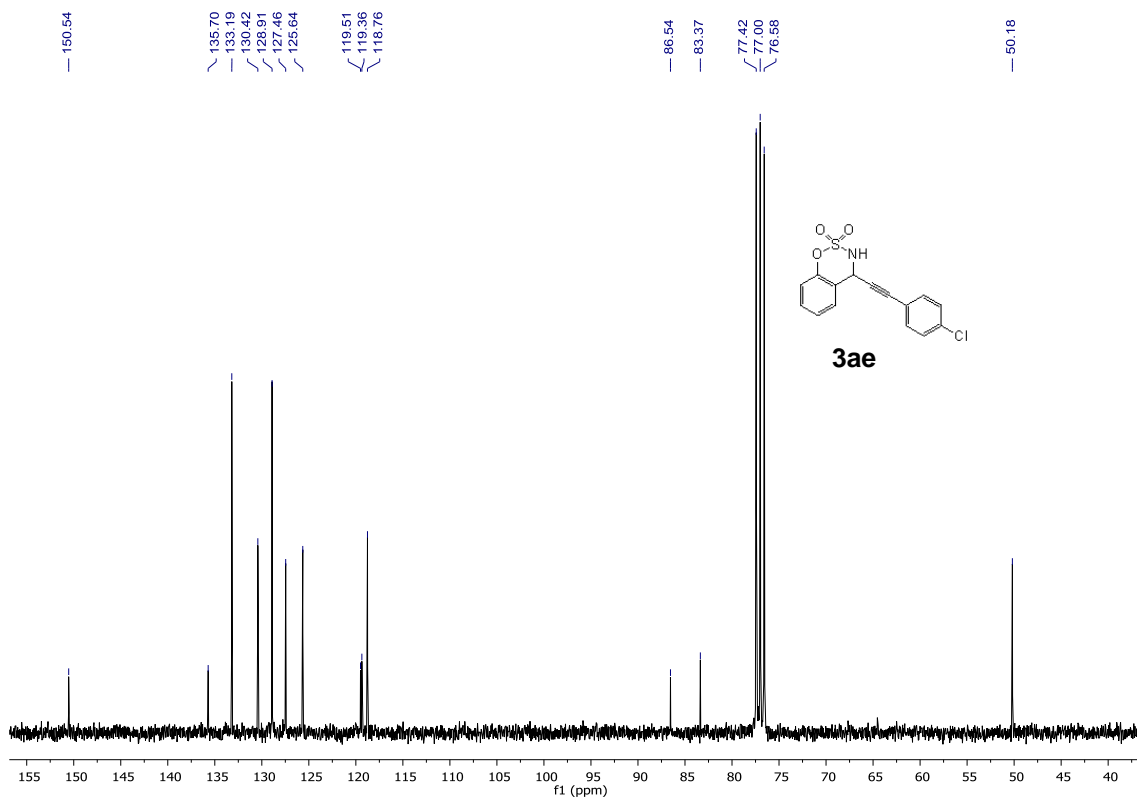



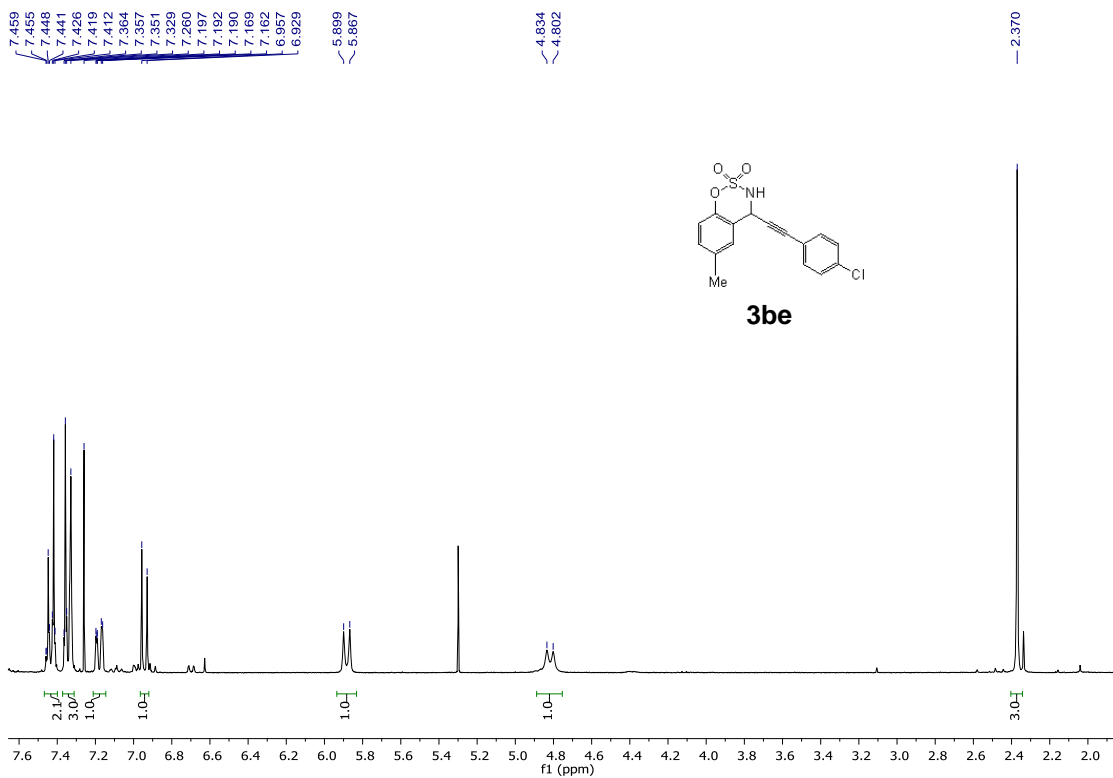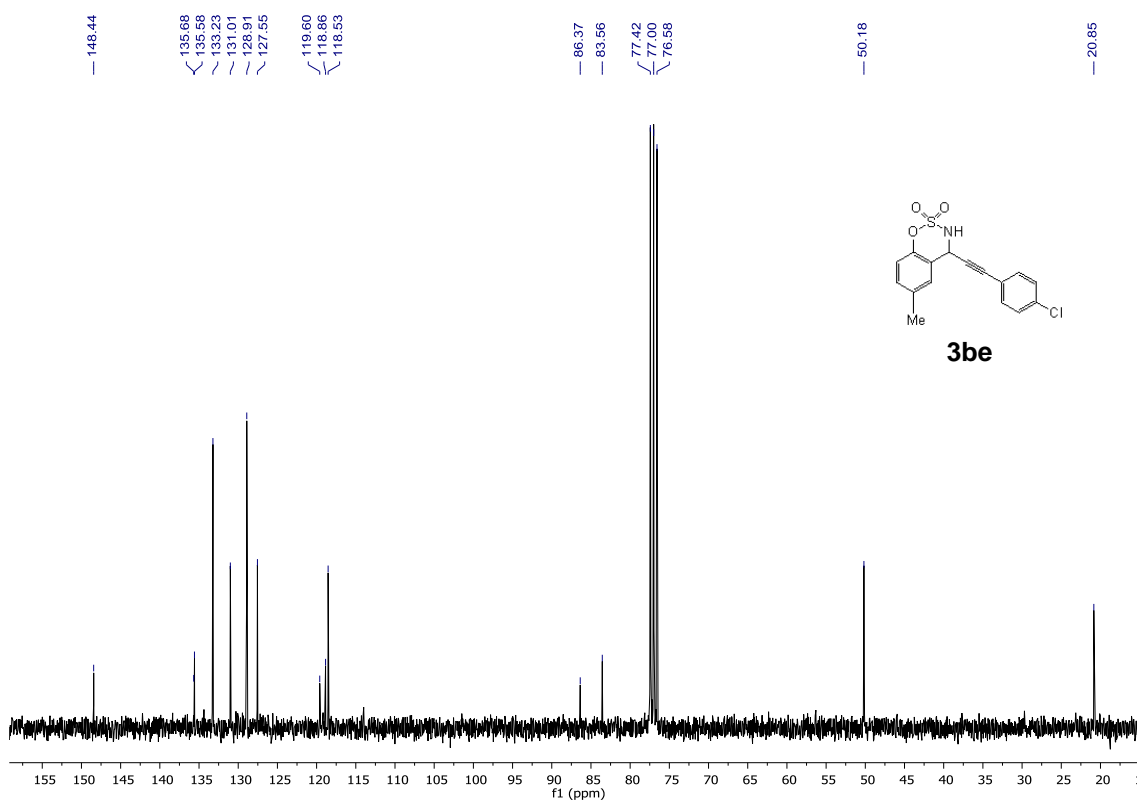

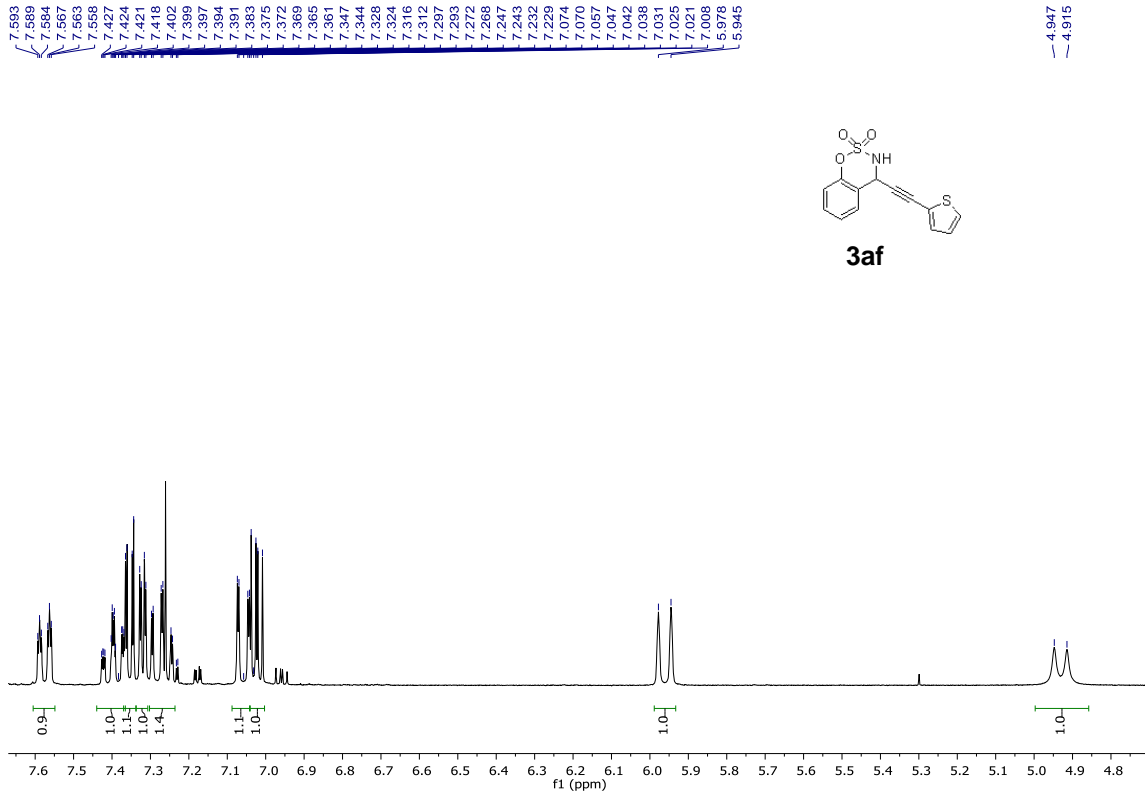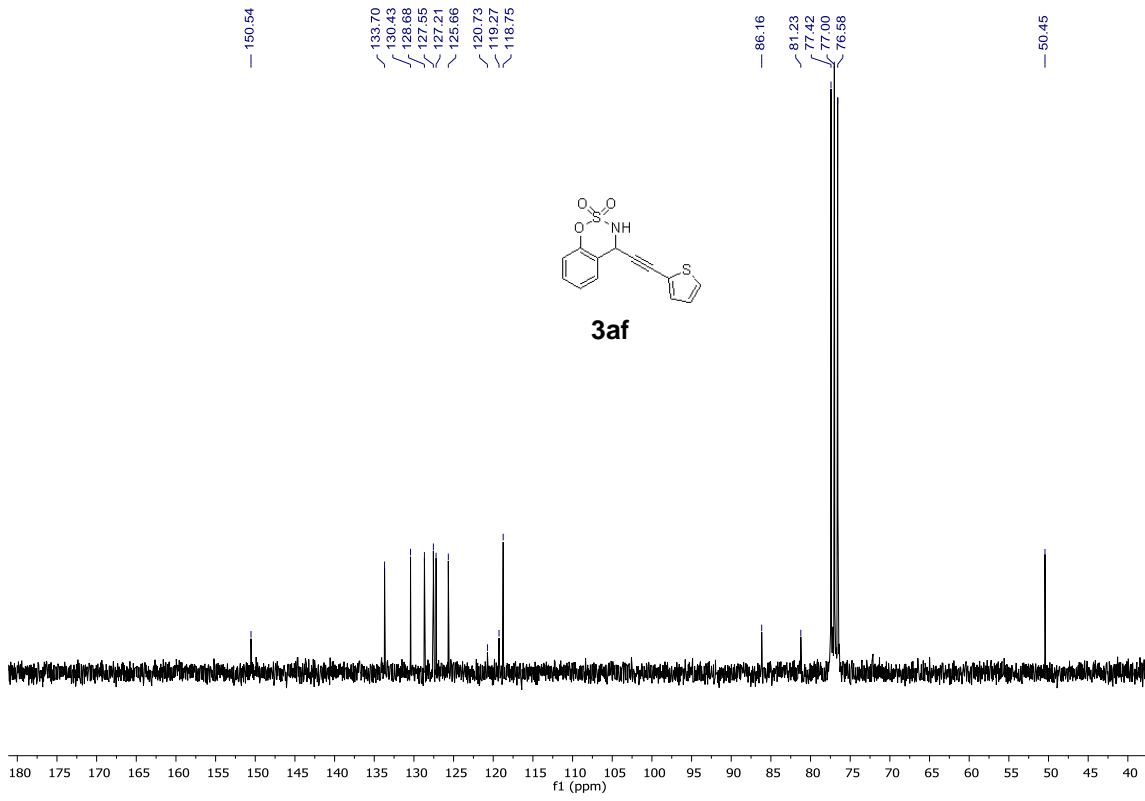

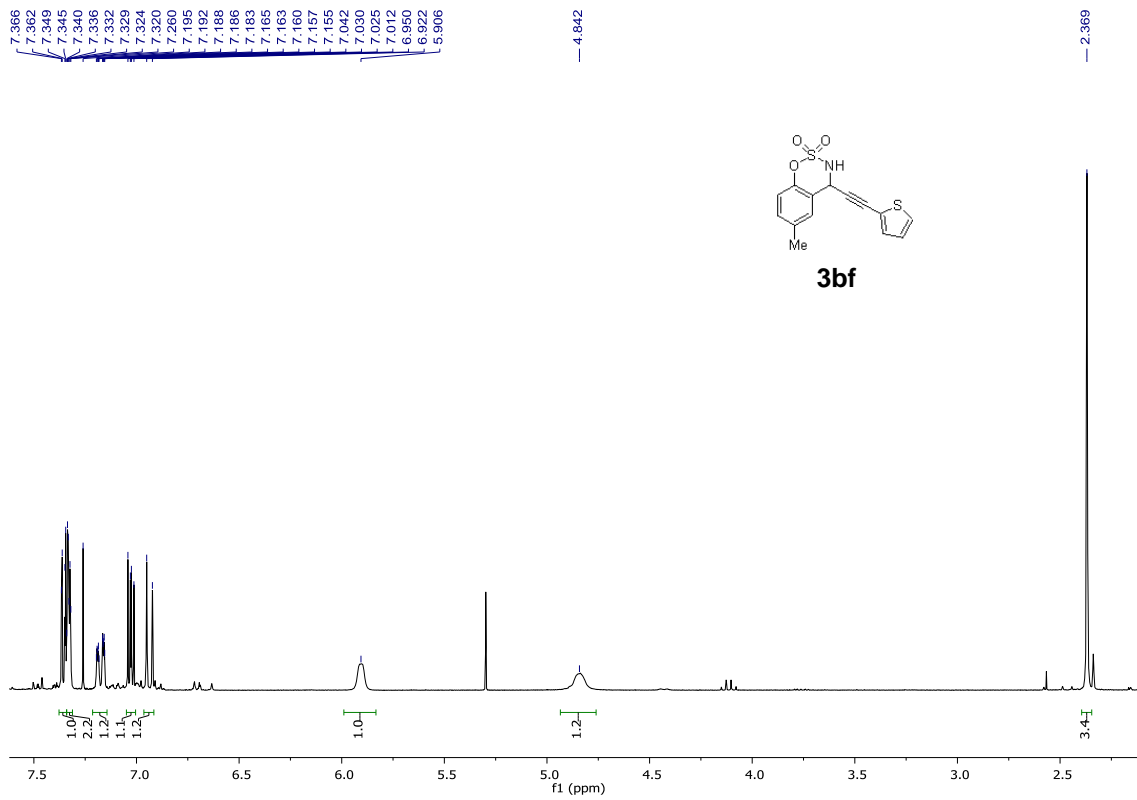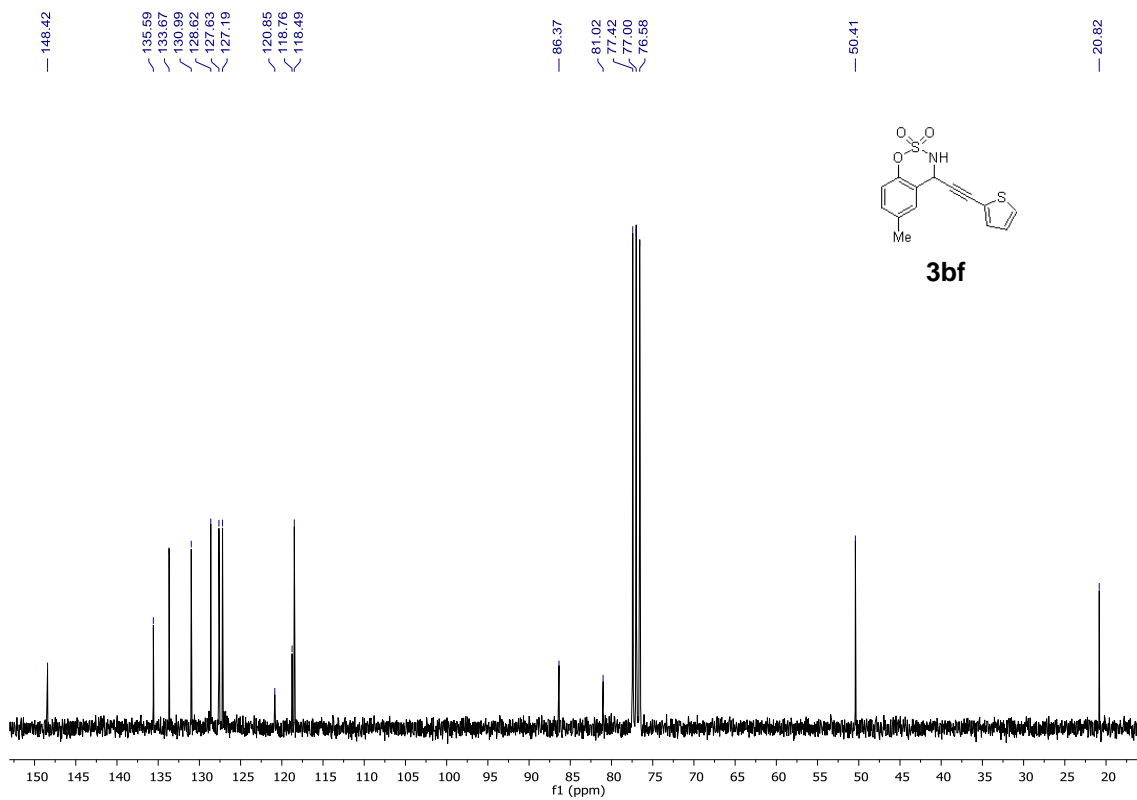

7.372  
7.370  
7.367  
7.364  
7.349  
7.343  
7.339  
7.328  
7.321  
7.315  
7.302  
7.297  
7.284  
7.289  
7.281  
7.275  
7.270  
7.260  
7.252  
7.240  
7.233  
7.228  
7.212  
7.206  
7.200  
7.196  
7.172  
7.149  
7.145  
7.012  
7.008  
6.984  
6.981  
5.649  
5.622

4.653  
4.626

2.900  
2.875  
2.851  
2.641  
2.634  
2.618  
2.610  
2.593  
2.566

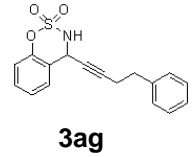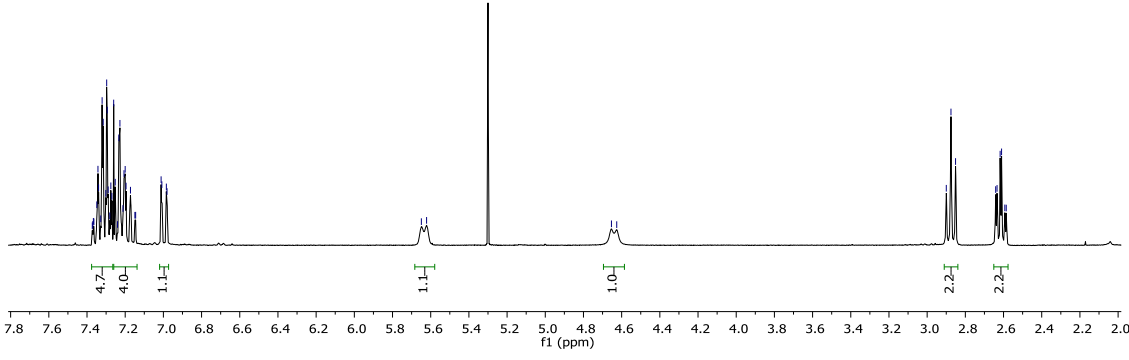

150.44  
139.92  
130.11  
128.49  
127.62  
126.58  
125.41  
119.91  
118.48  
88.14  
77.42  
77.00  
76.58  
74.92  
49.88  
34.35  
20.70

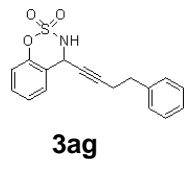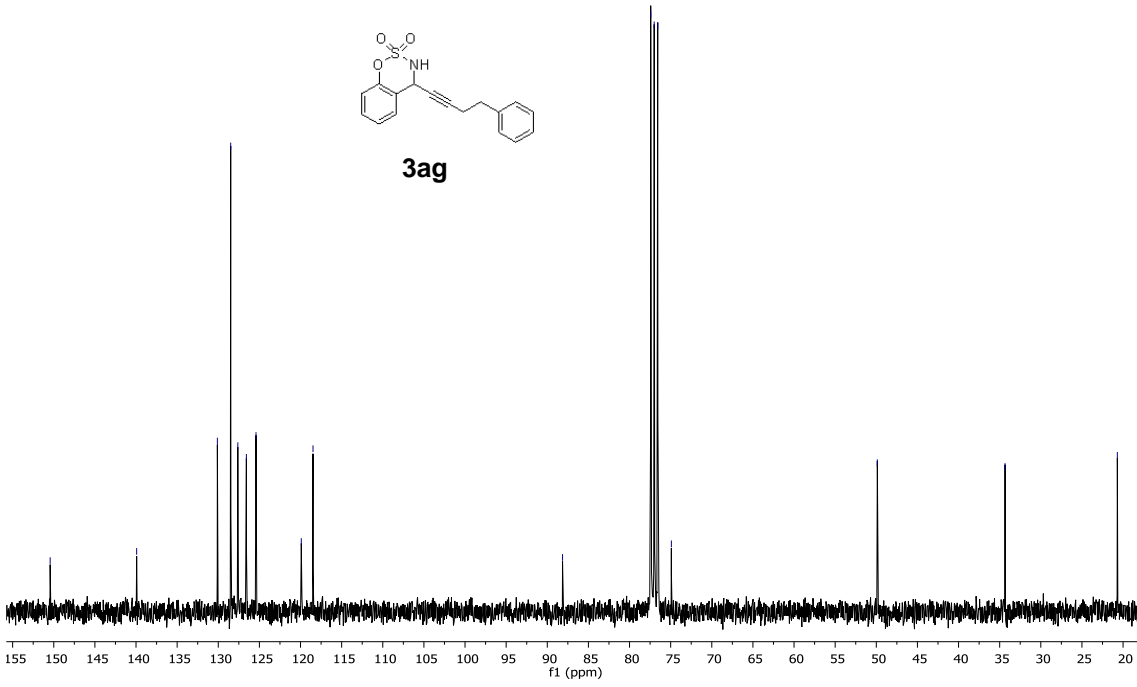

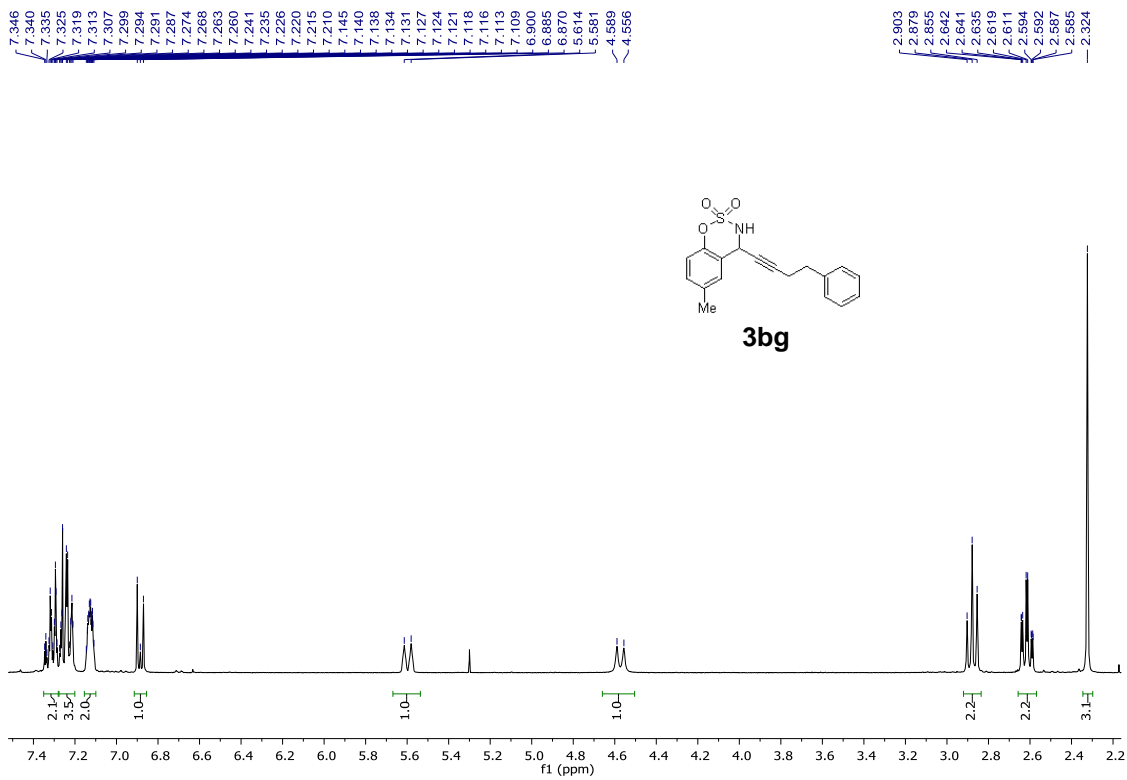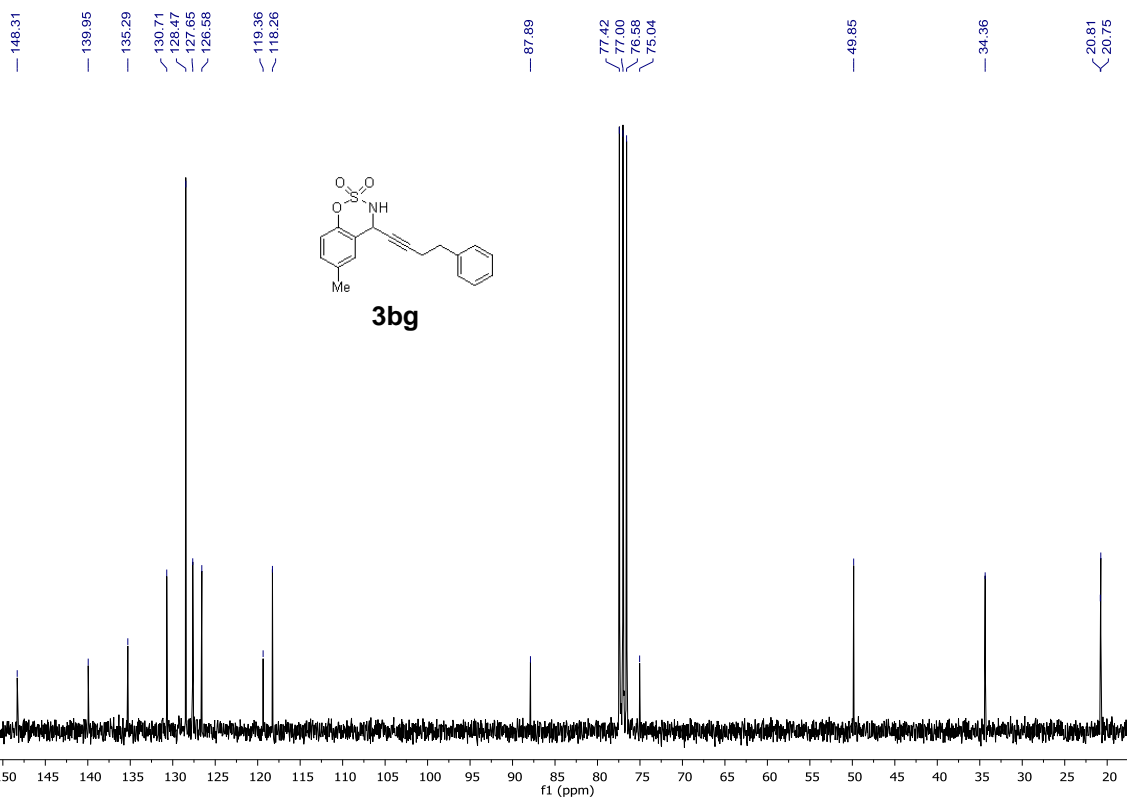

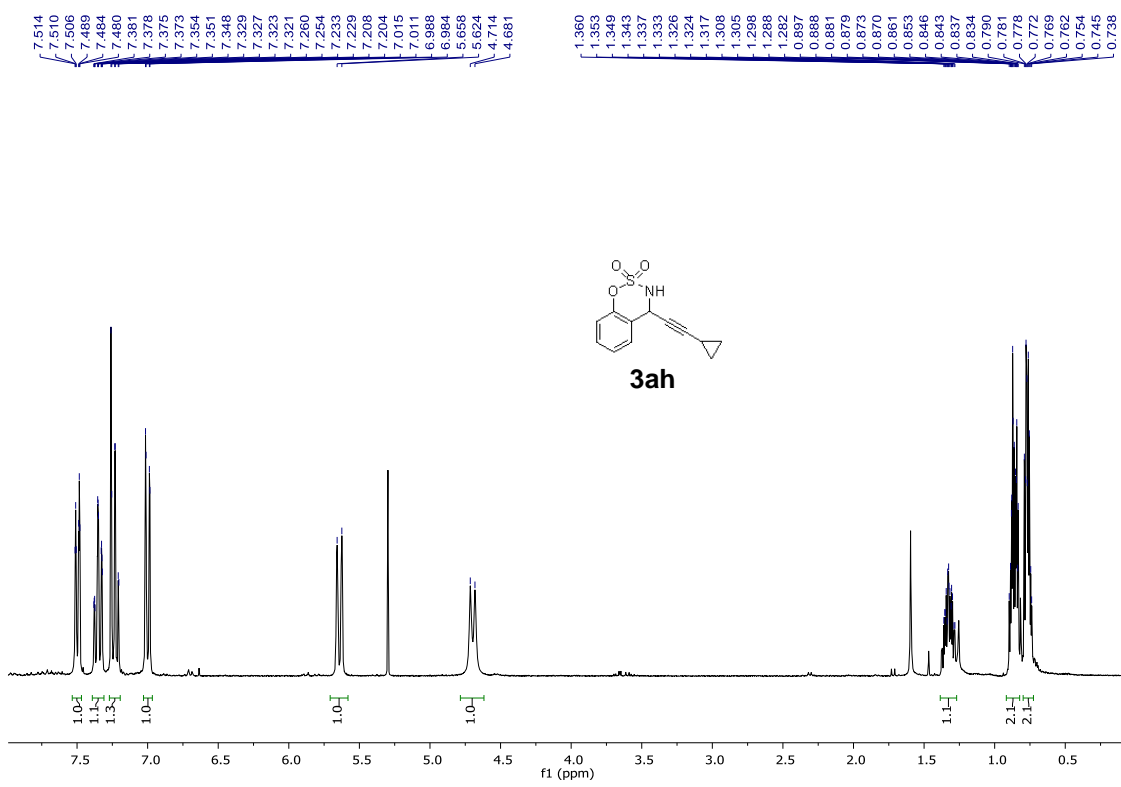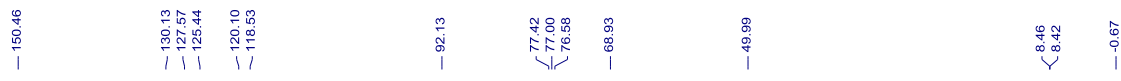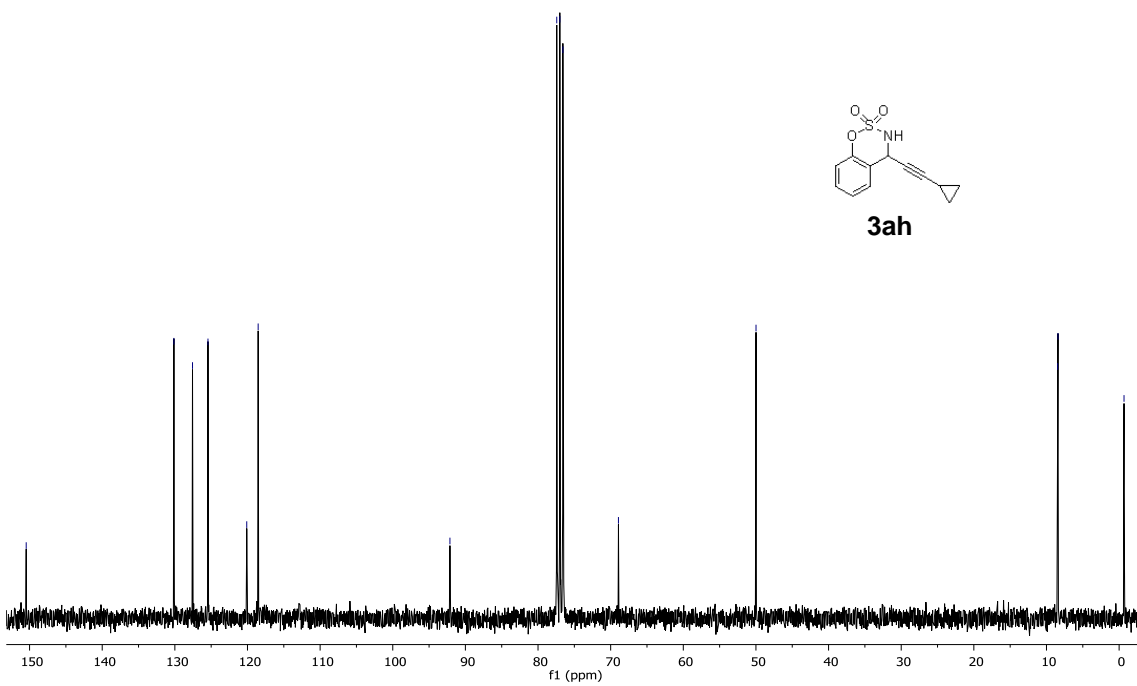

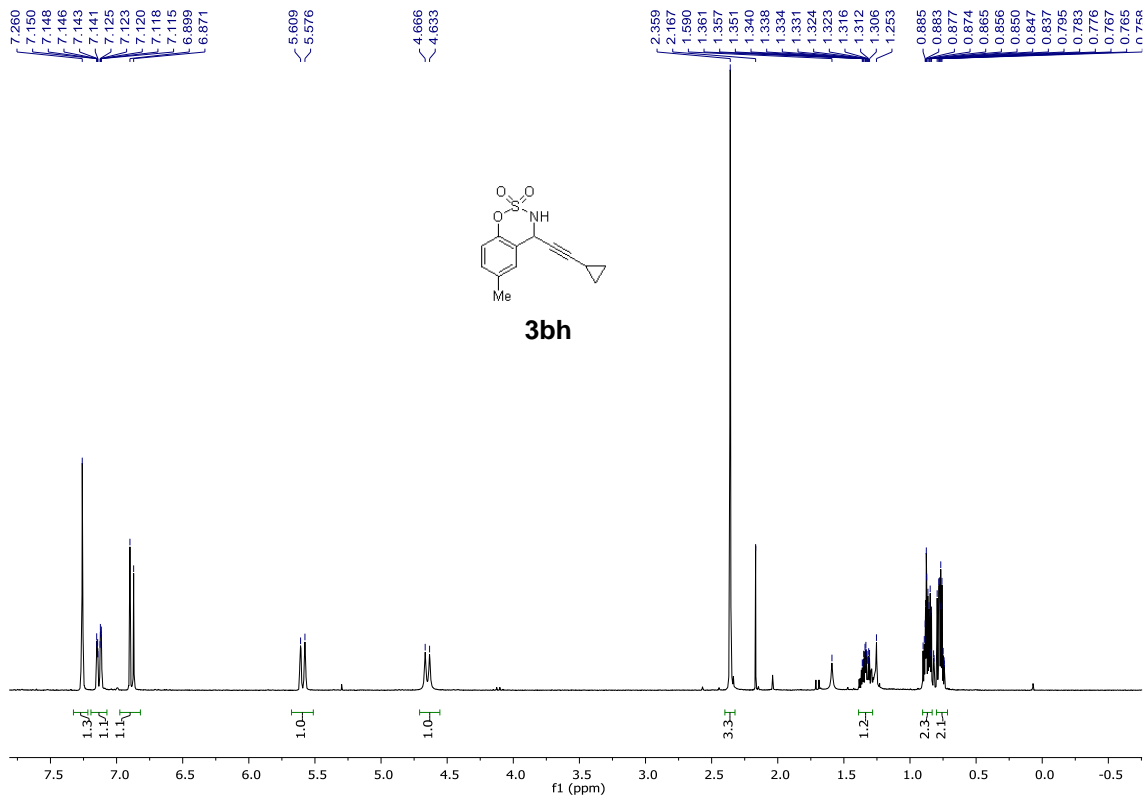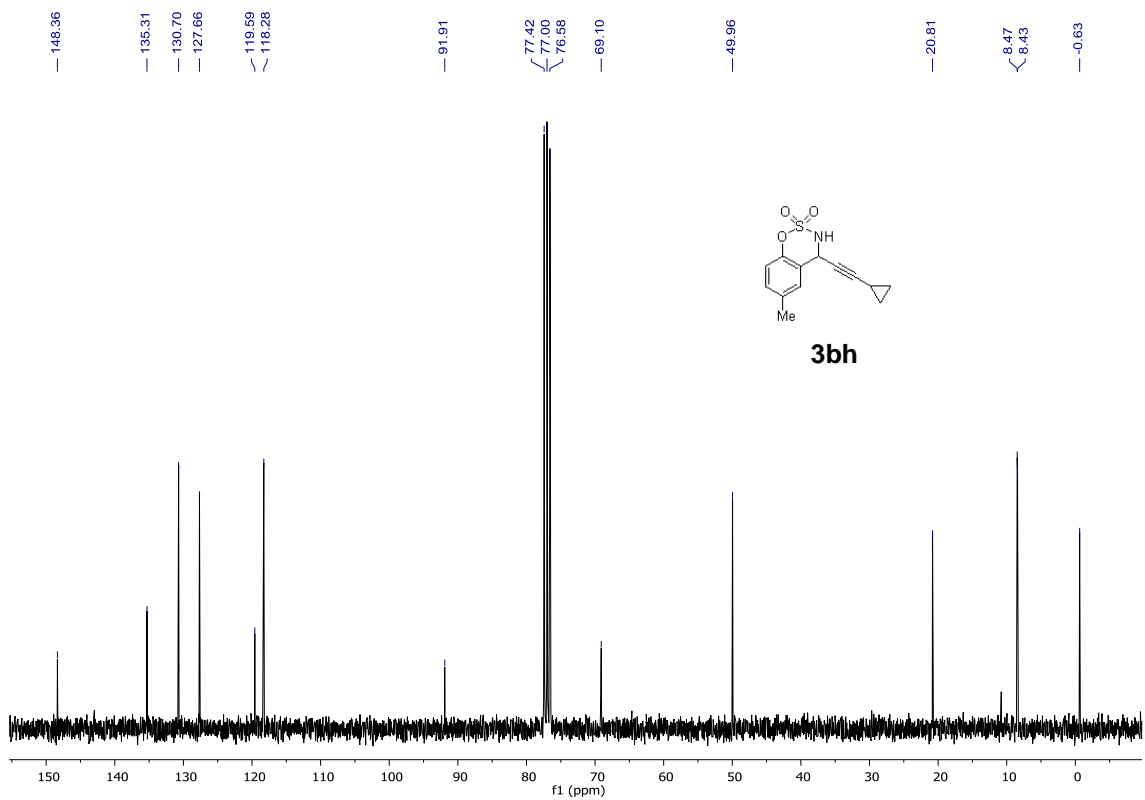

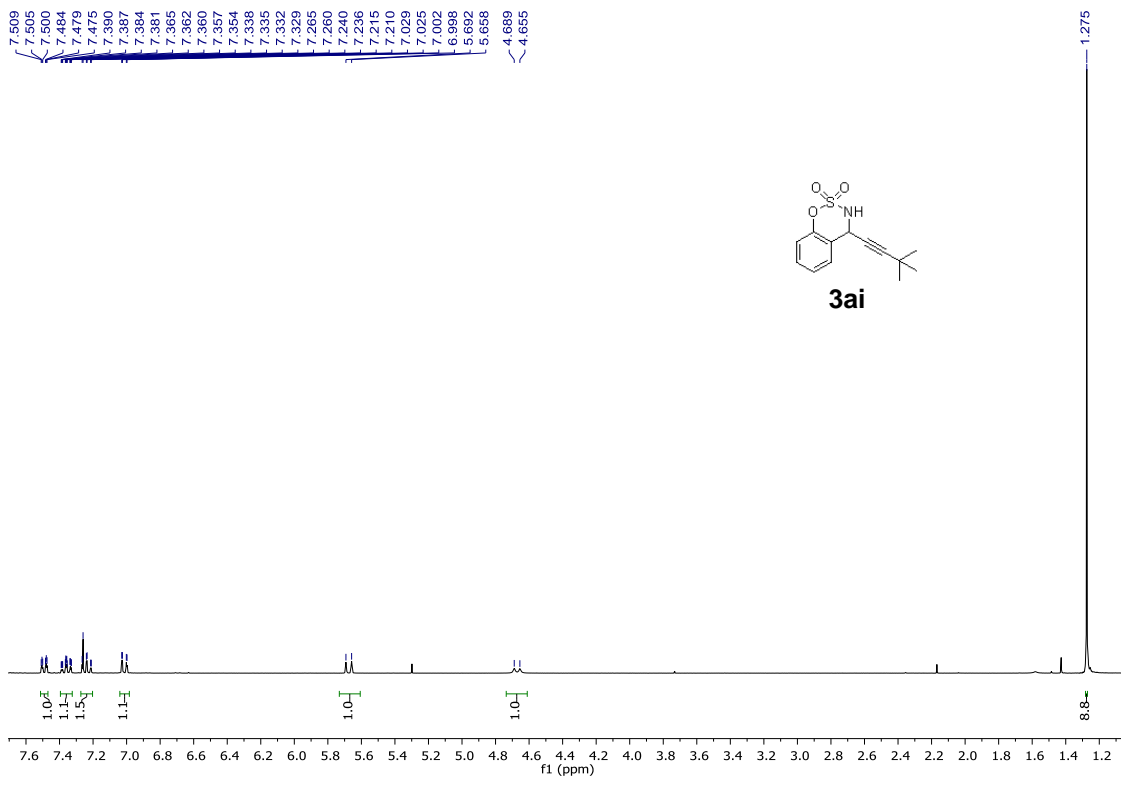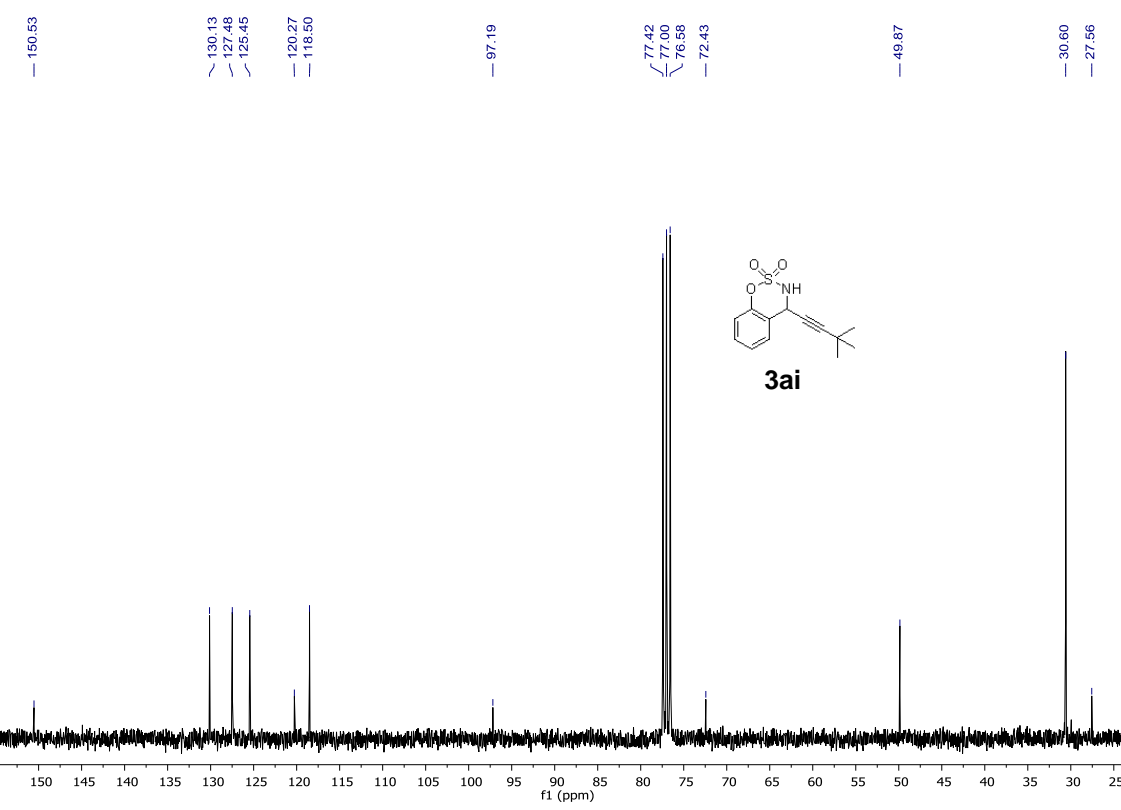



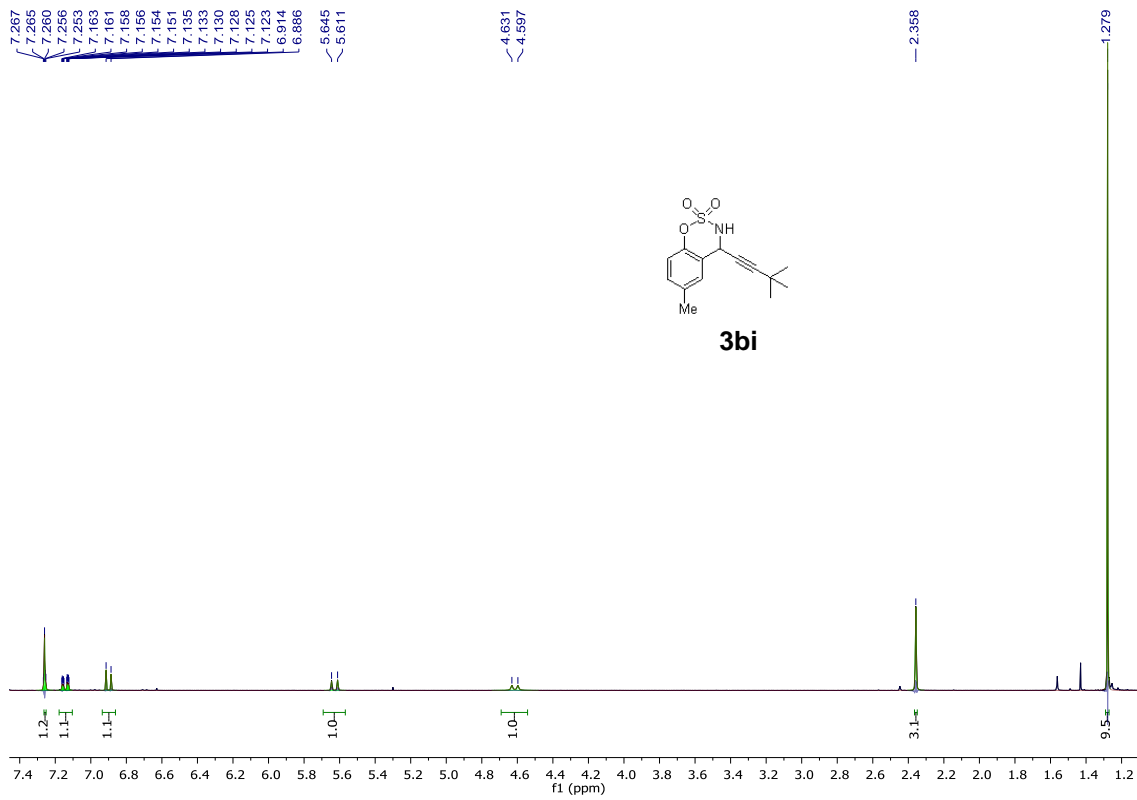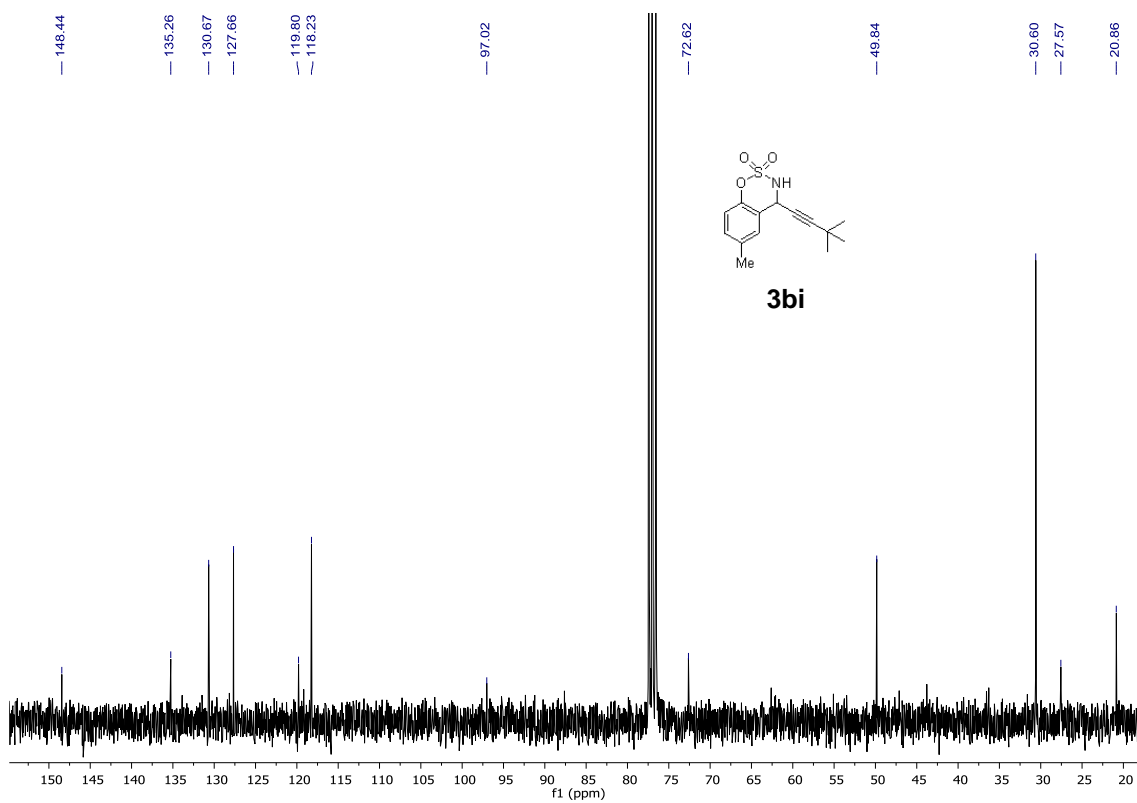

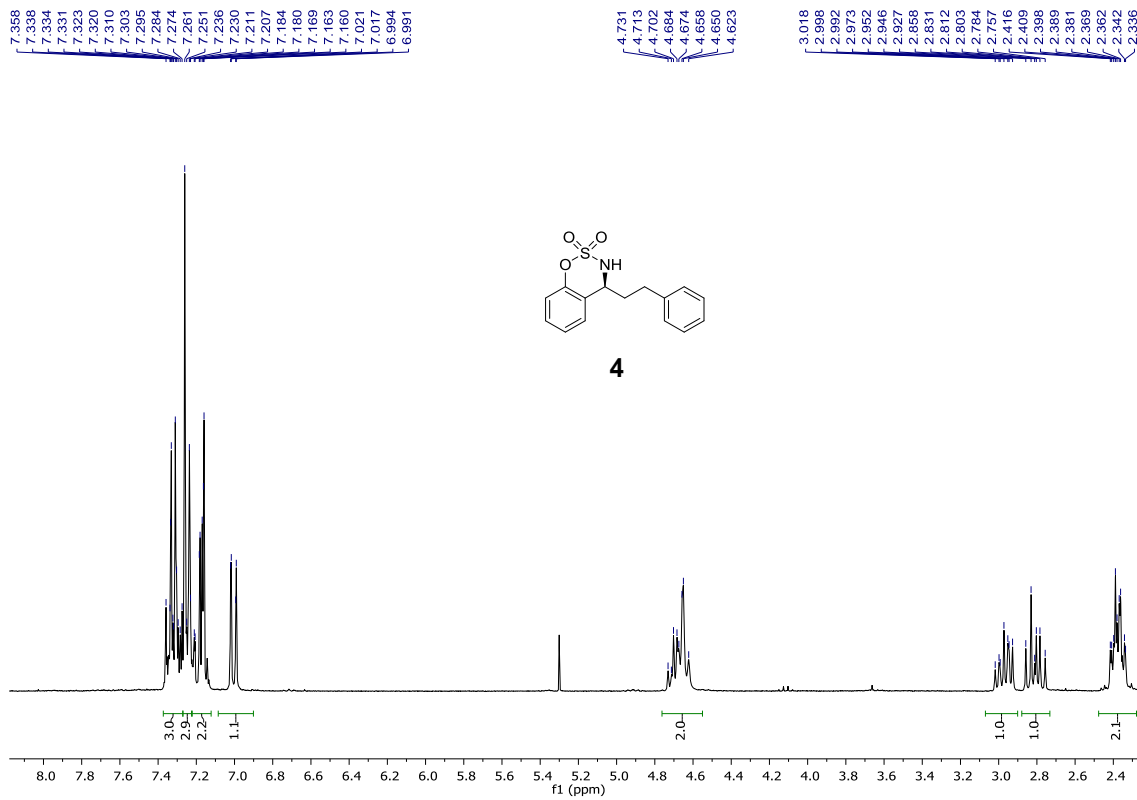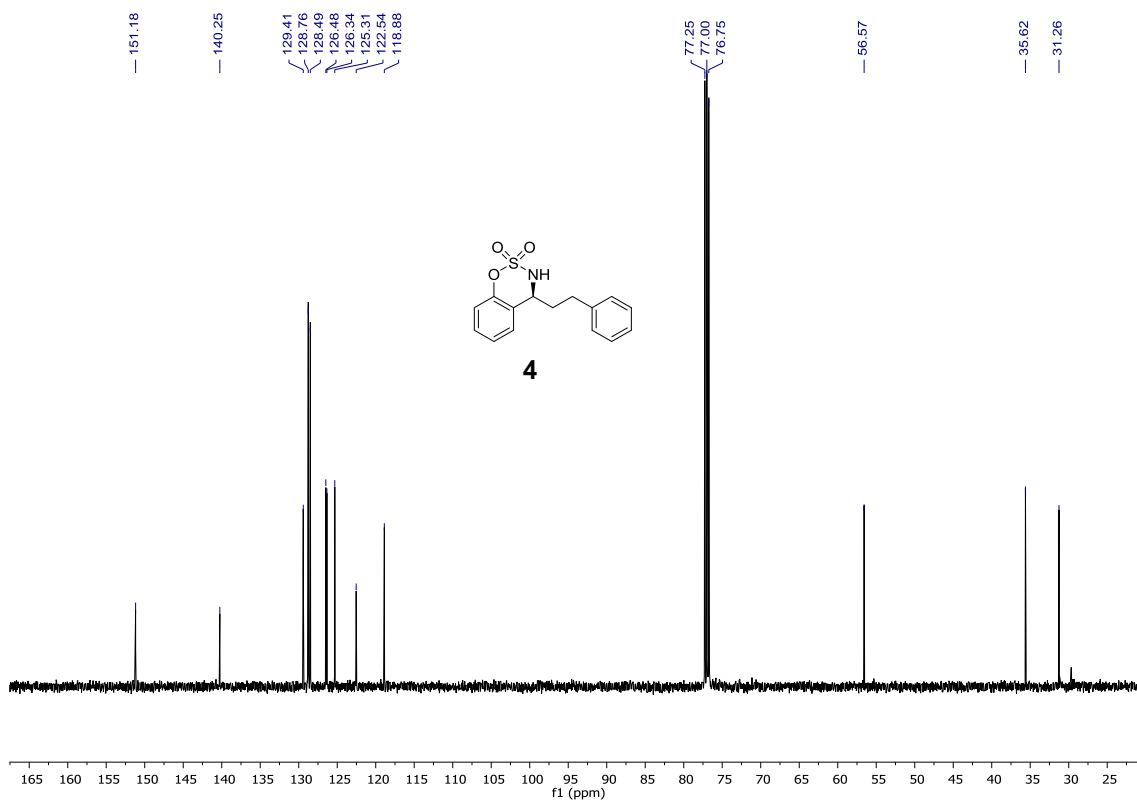

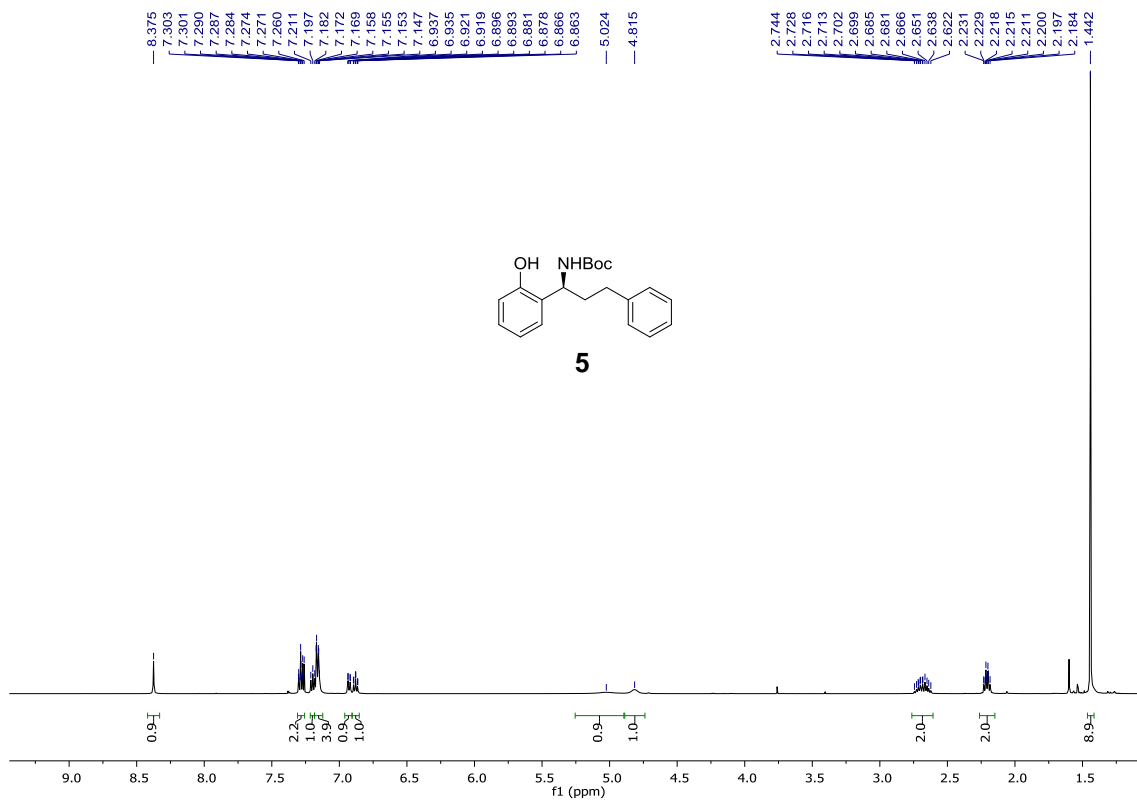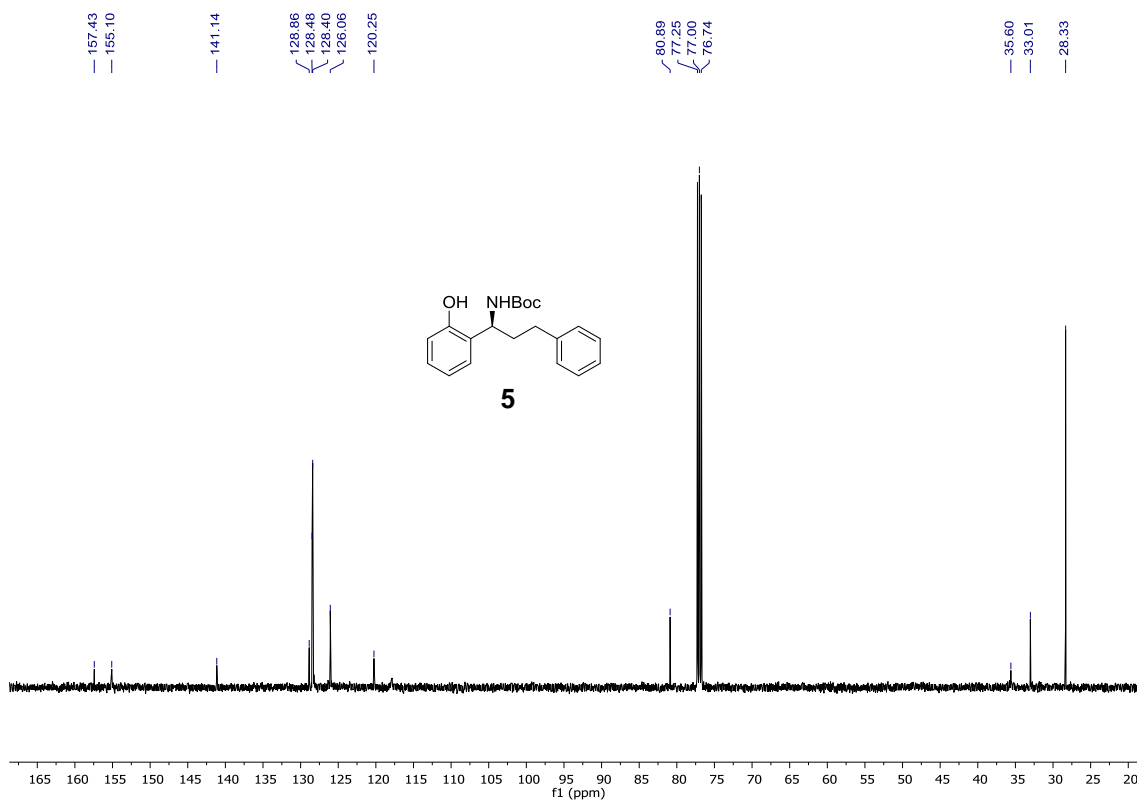

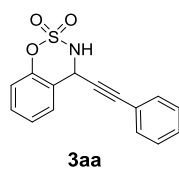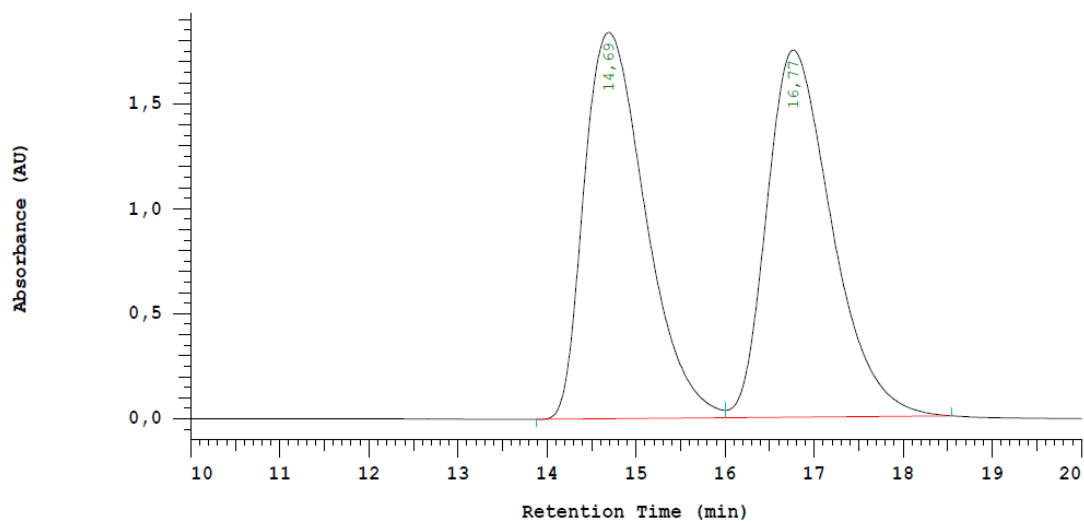

| No. | RT    | Area     | Area %  | Name |
|-----|-------|----------|---------|------|
| 1   | 14,69 | 44046144 | 49,831  |      |
| 2   | 16,77 | 44344188 | 50,169  |      |
|     |       | 88390332 | 100,000 |      |

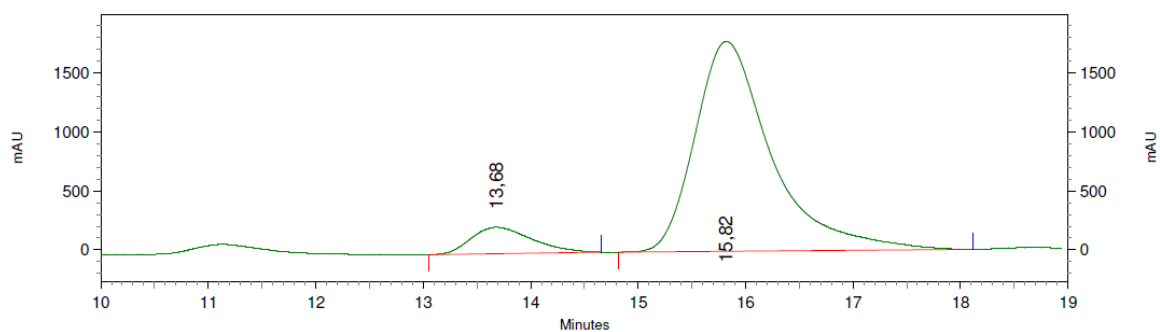

1: 247 nm, 4 nm Results

| Retention Time | Area      | Area Percent |
|----------------|-----------|--------------|
| 13,68          | 35001253  | 9,033        |
| 15,82          | 352473501 | 90,967       |

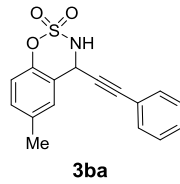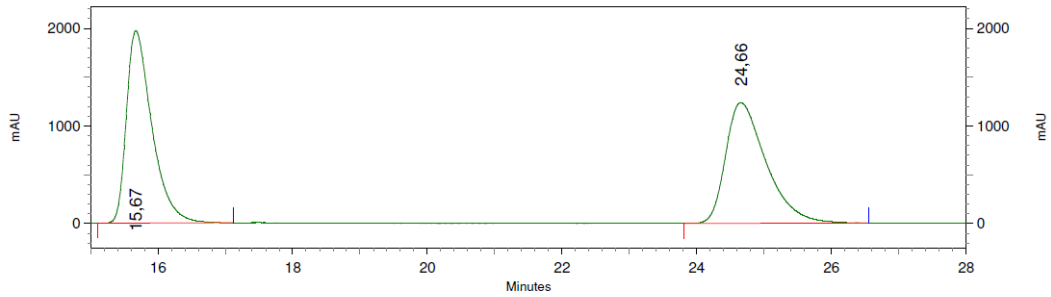

1: 229 nm, 4 nm Results

| Retention Time | Area      | Area Percent |
|----------------|-----------|--------------|
| 15,67          | 207685139 | 50,174       |
| 24,66          | 206243723 | 49,826       |

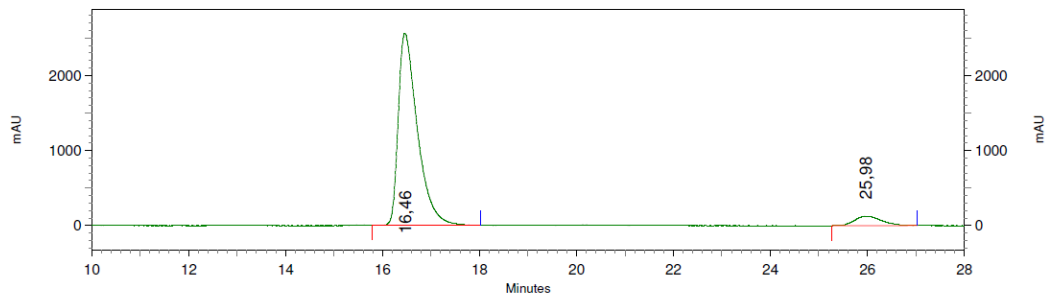

1: 229 nm, 4 nm Results

| Retention Time | Area      | Area Percent |
|----------------|-----------|--------------|
| 16,46          | 280553252 | 93,475       |
| 25,98          | 19584947  | 6,525        |

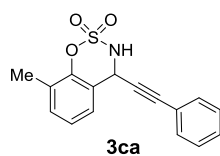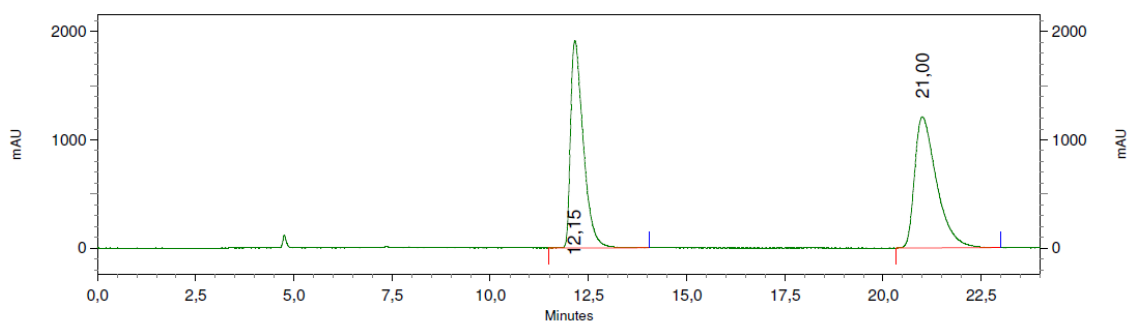

1: 255 nm, 4 nm Results

| Retention Time | Area      | Area Percent |
|----------------|-----------|--------------|
| 12,15          | 172850419 | 47,827       |
| 21,00          | 188560231 | 52,173       |

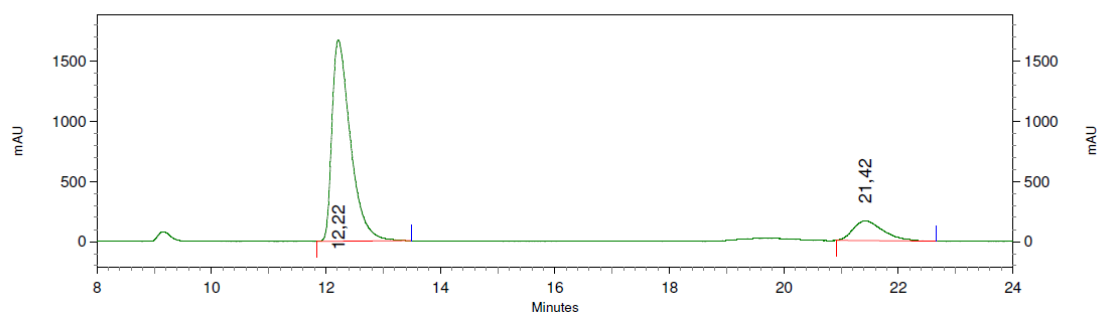

1: 255 nm, 4 nm Results

| Retention Time | Area      | Area Percent |
|----------------|-----------|--------------|
| 12,22          | 149867682 | 86,288       |
| 21,42          | 23815134  | 13,712       |

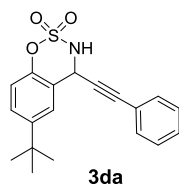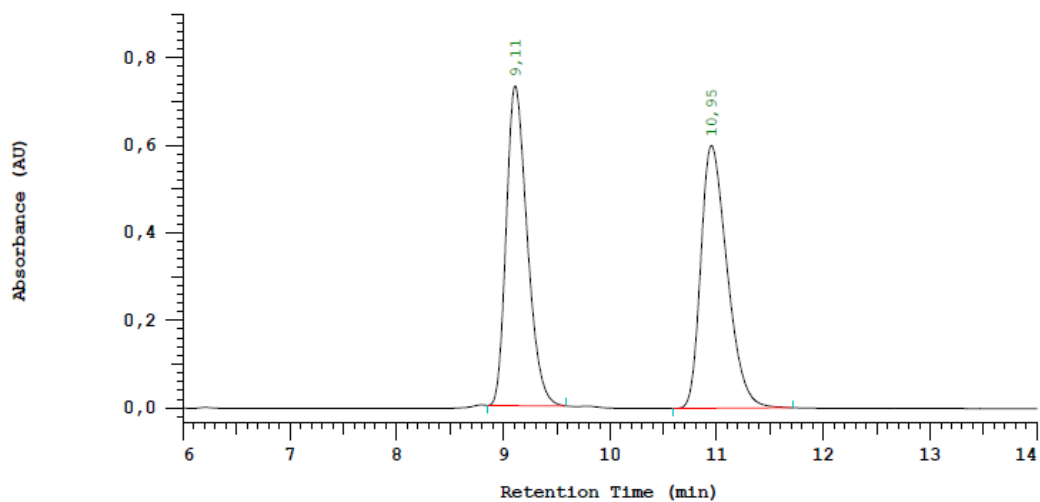

| No. | RT    | Area     | Area %  | Name |
|-----|-------|----------|---------|------|
| 1   | 9,11  | 4993679  | 49,240  |      |
| 2   | 10,95 | 5147916  | 50,760  |      |
|     |       | 10141595 | 100,000 |      |

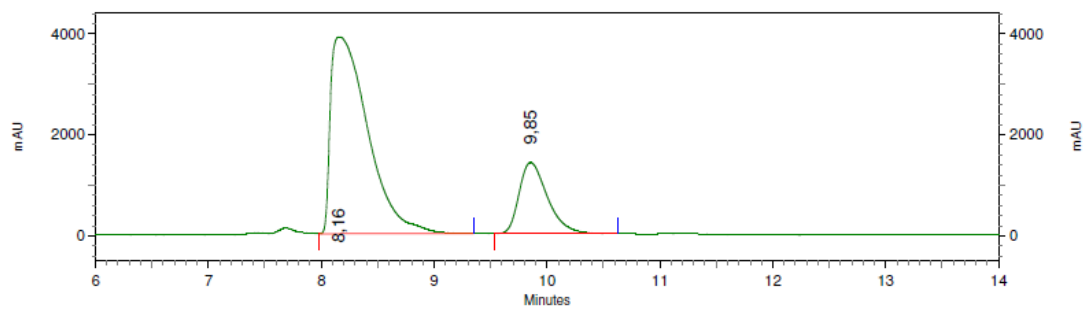

1: 254 nm, 4 nm Results

| Retention Time | Area      | Area Percent |
|----------------|-----------|--------------|
| 8,16           | 357350265 | 78,407       |
| 9,85           | 98411365  | 21,593       |

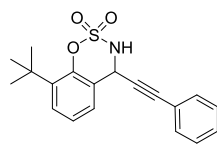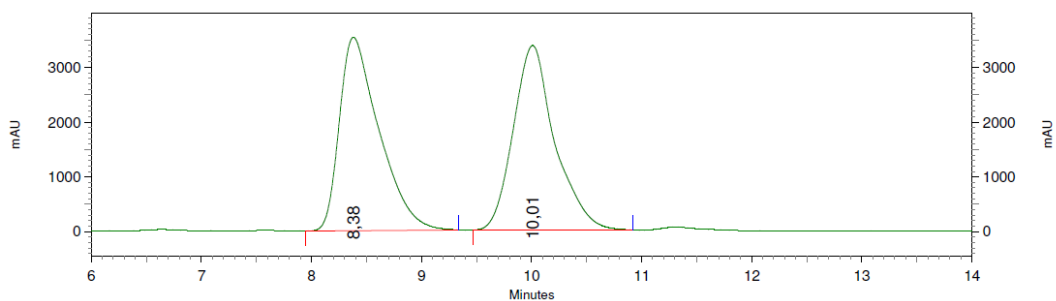

1: 235 nm, 4 nm Results

| Retention Time | Area      | Area Percent |
|----------------|-----------|--------------|
| 8,38           | 354051746 | 50,082       |
| 10,01          | 352892165 | 49,918       |

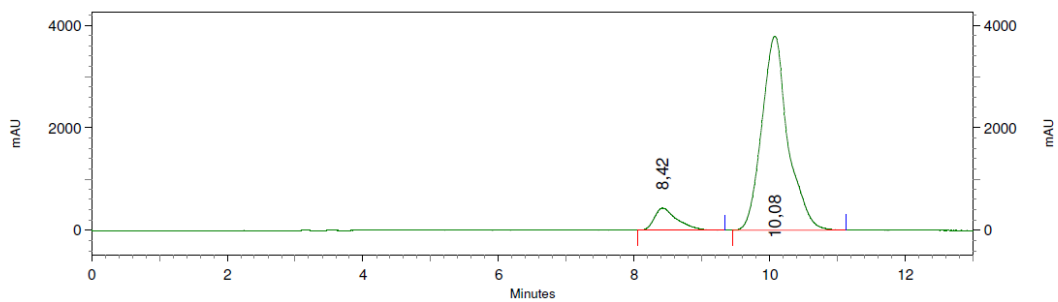

1: 230 nm, 4 nm Results

| Retention Time | Area      | Area Percent |
|----------------|-----------|--------------|
| 8,42           | 40718544  | 9,142        |
| 10,08          | 404694852 | 90,858       |



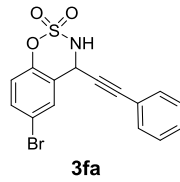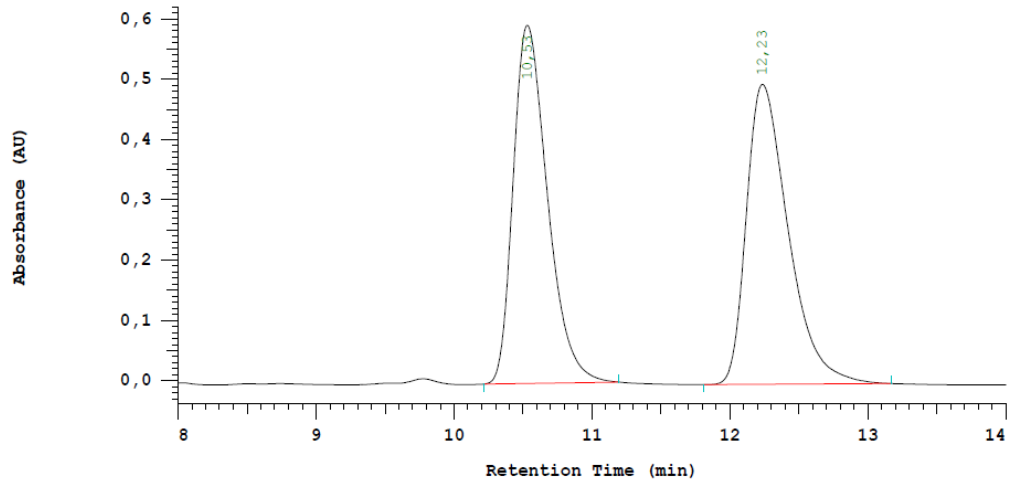

| No. | RT    | Area     | Area %  | Name |
|-----|-------|----------|---------|------|
| 1   | 10,53 | 5124505  | 49,448  |      |
| 2   | 12,23 | 5238924  | 50,552  |      |
|     |       | 10363429 | 100,000 |      |

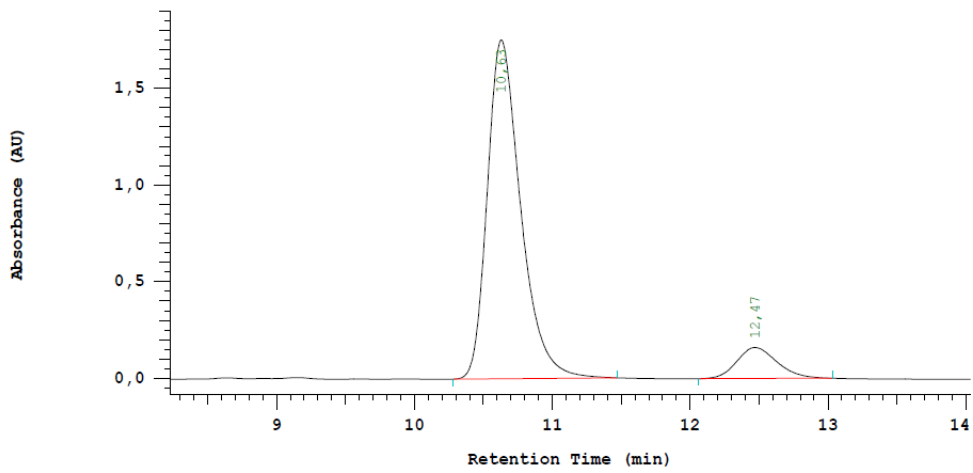

| No. | RT    | Area     | Area %  | Name |
|-----|-------|----------|---------|------|
| 1   | 10,63 | 14698747 | 90,082  |      |
| 2   | 12,47 | 1618241  | 9,918   |      |
|     |       | 16316988 | 100,000 |      |

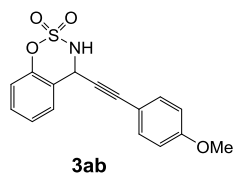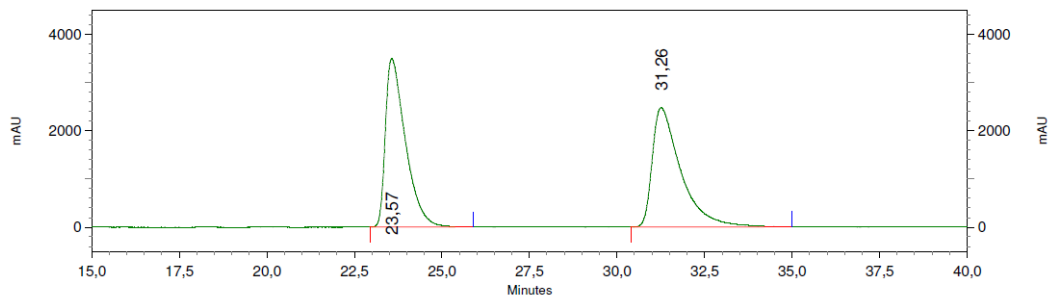

1: 250 nm, 4 nm Results

| Retention Time | Area      | Area Percent |
|----------------|-----------|--------------|
| 23,57          | 556079342 | 49,768       |
| 31,26          | 561270912 | 50,232       |

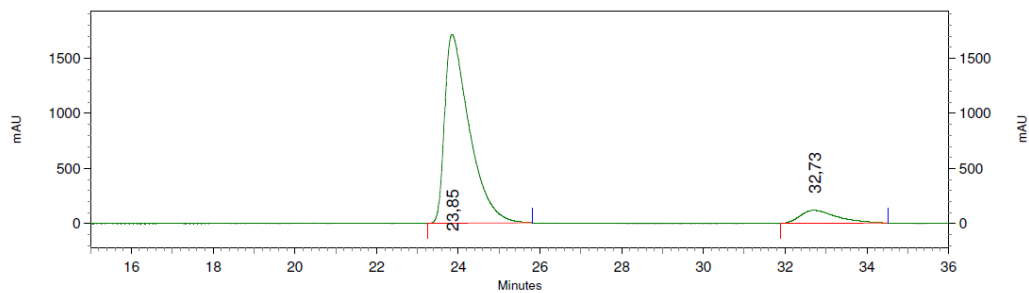

1: 237 nm, 4 nm Results

| Retention Time | Area      | Area Percent |
|----------------|-----------|--------------|
| 23,85          | 287489105 | 90,667       |
| 32,73          | 29594950  | 9,333        |

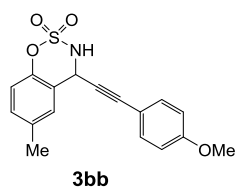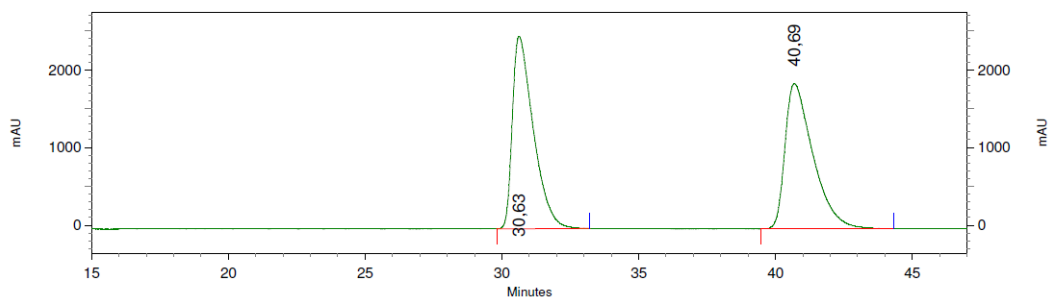

1: 250 nm, 4 nm Results

| Retention Time | Area      | Area Percent |
|----------------|-----------|--------------|
| 30,63          | 526652951 | 49,843       |
| 40,69          | 529960752 | 50,157       |

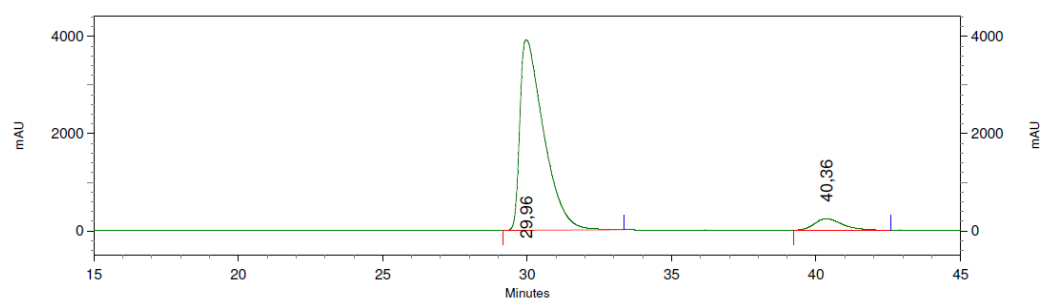

1: 250 nm, 4 nm Results

| Retention Time | Area      | Area Percent |
|----------------|-----------|--------------|
| 29,96          | 894453965 | 93,528       |
| 40,36          | 61895044  | 6,472        |

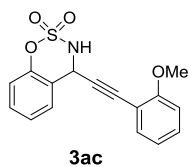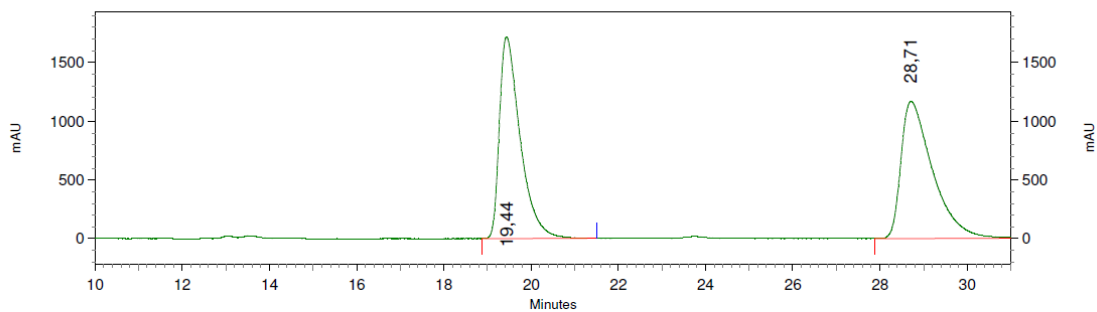

1: 255 nm, 4 nm Results

| Retention Time | Area      | Area Percent |
|----------------|-----------|--------------|
| 19,44          | 227544899 | 48,977       |
| 28,71          | 237055081 | 51,023       |

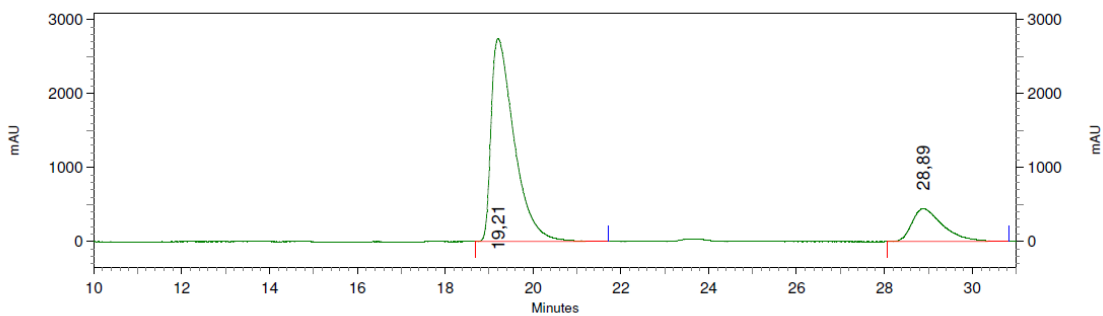

1: 255 nm, 4 nm Results

| Retention Time | Area      | Area Percent |
|----------------|-----------|--------------|
| 19,21          | 399785143 | 82,148       |
| 28,89          | 86878970  | 17,852       |

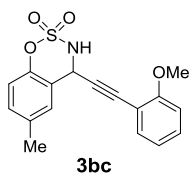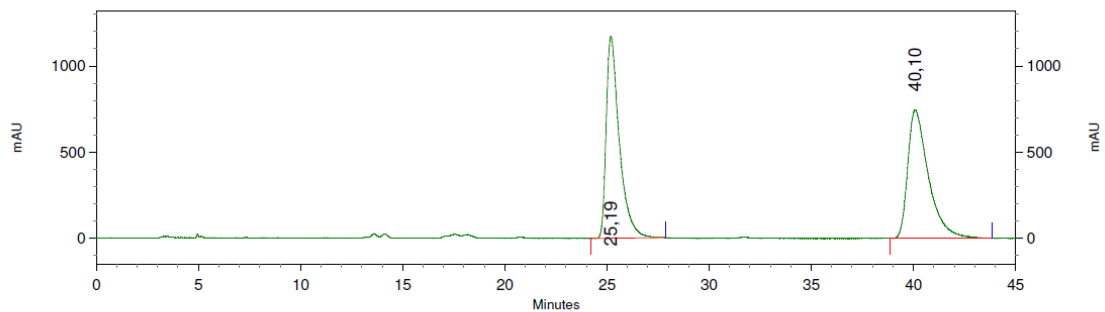

1: 212 nm, 4 nm Results

| Retention Time | Area      | Area Percent |
|----------------|-----------|--------------|
| 25,19          | 209612896 | 49,827       |
| 40,10          | 211068884 | 50,173       |

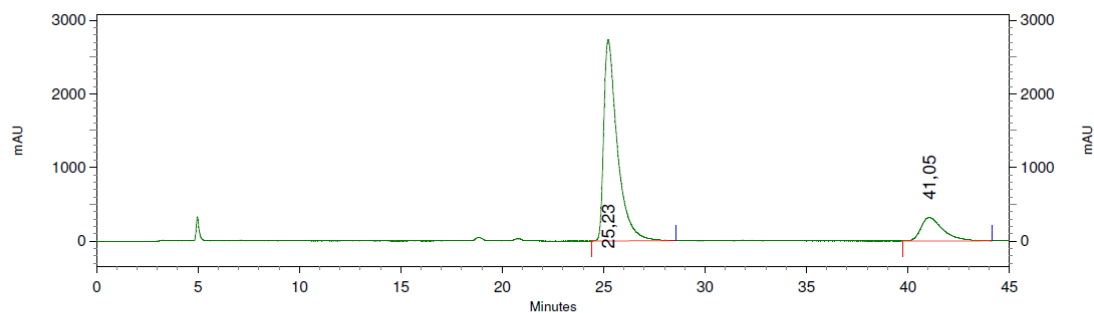

1: 212 nm, 4 nm Results

| Retention Time | Area      | Area Percent |
|----------------|-----------|--------------|
| 25,23          | 507736811 | 84,096       |
| 41,05          | 96023903  | 15,904       |

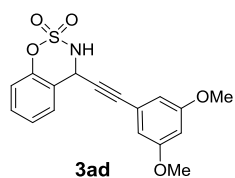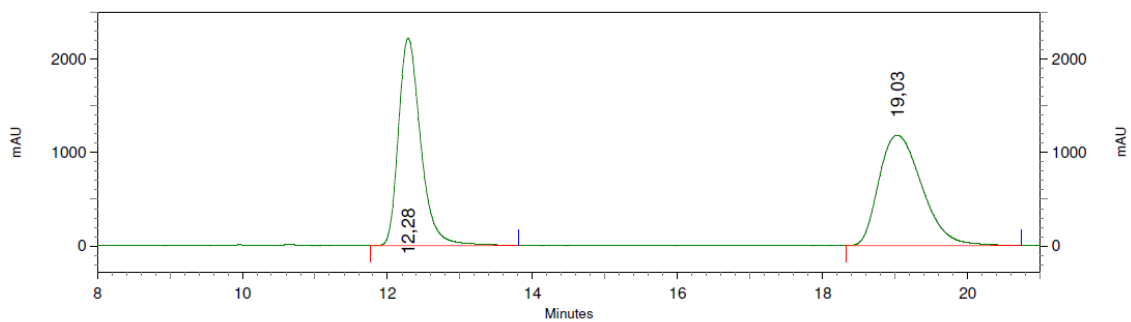

1: 267 nm, 4 nm Results

| Retention Time | Area      | Area Percent |
|----------------|-----------|--------------|
| 12,28          | 189634322 | 49,309       |
| 19,03          | 194949902 | 50,691       |

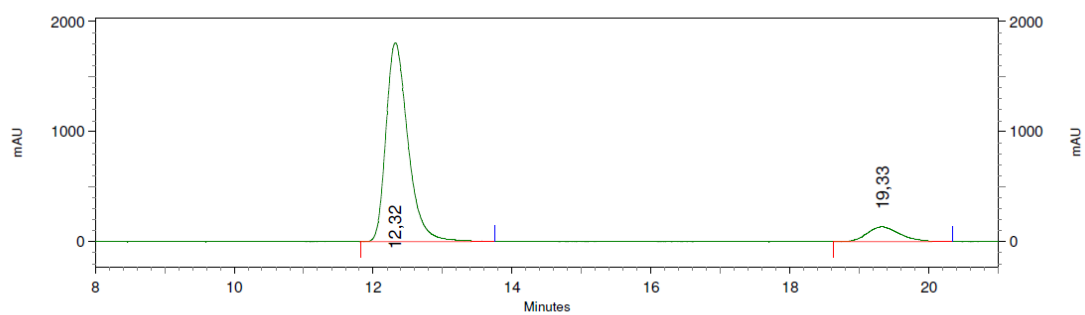

1: 267 nm, 4 nm Results

| Retention Time | Area      | Area Percent |
|----------------|-----------|--------------|
| 12,32          | 158702029 | 89,929       |
| 19,33          | 17773541  | 10,071       |

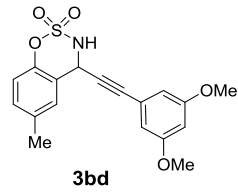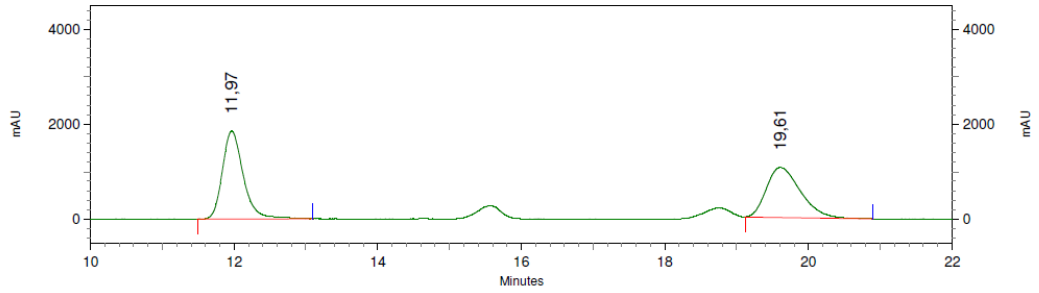

1: 253 nm, 4 nm Results

| Retention Time | Area      | Area Percent |
|----------------|-----------|--------------|
| 11,97          | 150368895 | 51,993       |
| 19,61          | 138840384 | 48,007       |

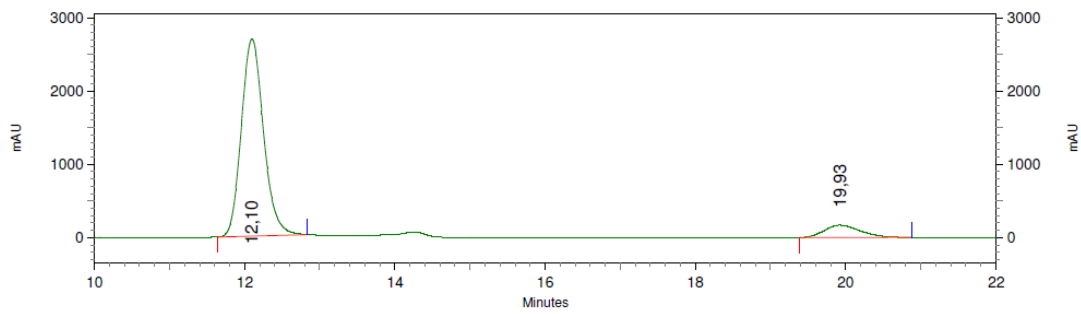

1: 267 nm, 4 nm Results

| Retention Time | Area      | Area Percent |
|----------------|-----------|--------------|
| 12,10          | 220939667 | 90,787       |
| 19,93          | 22420193  | 9,213        |

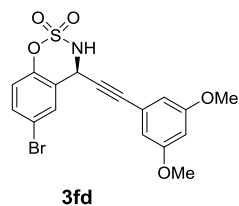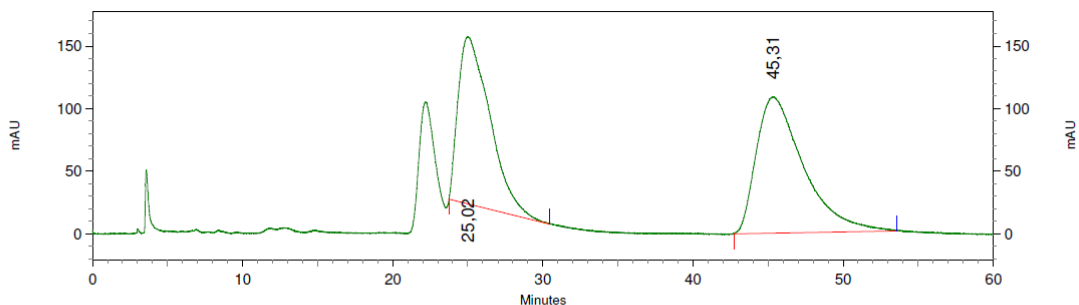

1: 229 nm, 4 nm Results

| Retention Time | Area     | Area Percent |
|----------------|----------|--------------|
| 25,02          | 78882755 | 45,322       |
| 45,31          | 95166370 | 54,678       |

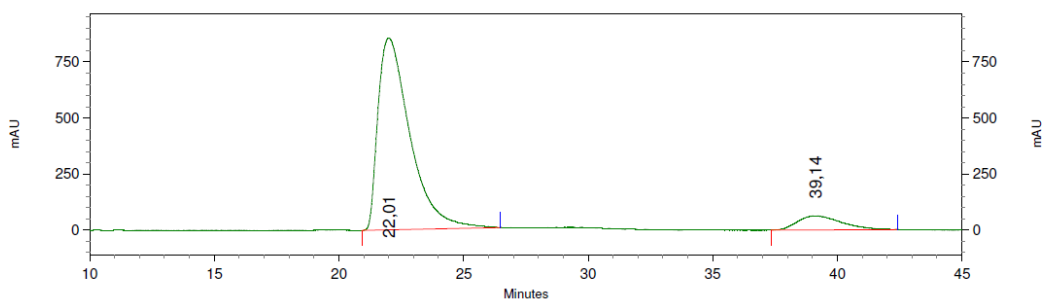

1: 254 nm, 4 nm Results

| Retention Time | Area      | Area Percent |
|----------------|-----------|--------------|
| 22,01          | 305302273 | 90,747       |
| 39,14          | 31129066  | 9,253        |

*e.e.* after crystallization

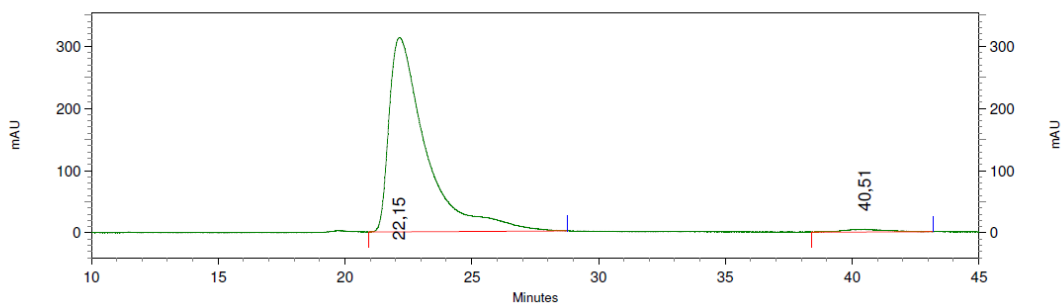

1: 231 nm, 4 nm Results

| Retention Time | Area      | Area Percent |
|----------------|-----------|--------------|
| 22,15          | 126469741 | 98,195       |
| 40,51          | 2325369   | 1,805        |



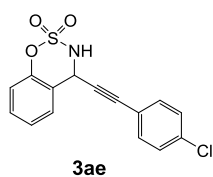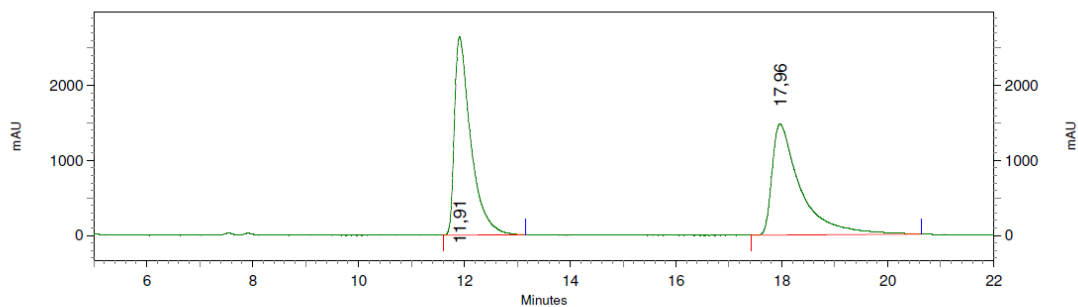

1: 228 nm, 4 nm Results

| Retention Time | Area      | Area Percent |
|----------------|-----------|--------------|
| 11,91          | 226827638 | 50,567       |
| 17,96          | 221738707 | 49,433       |

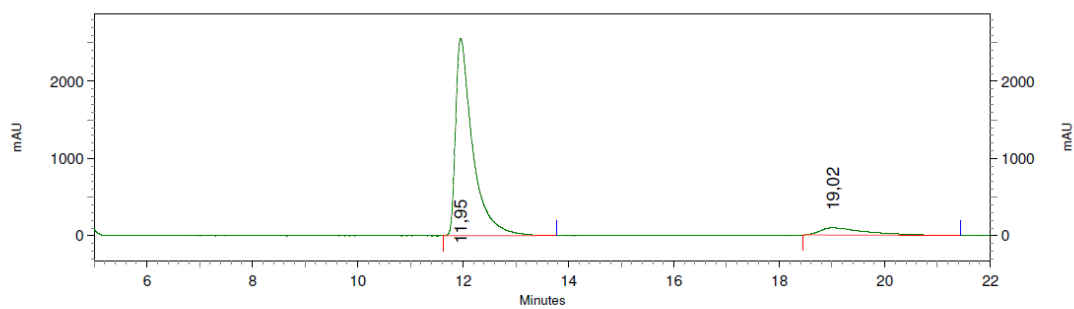

1: 228 nm, 4 nm Results

| Retention Time | Area      | Area Percent |
|----------------|-----------|--------------|
| 11,95          | 229404235 | 90,804       |
| 19,02          | 23232088  | 9,196        |

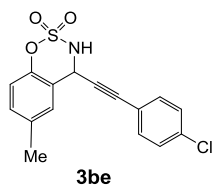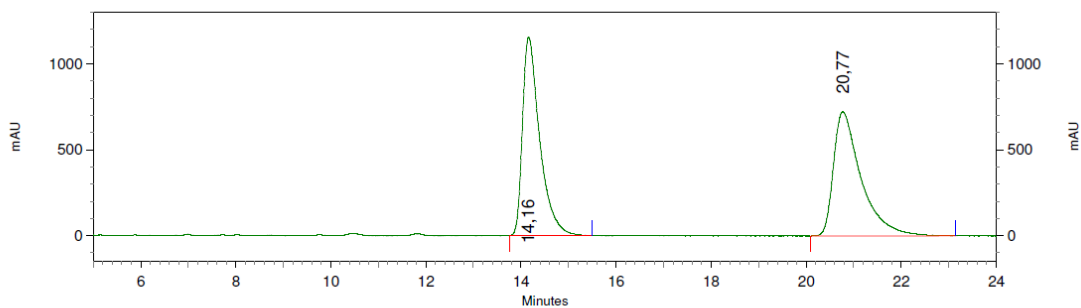

1: 230 nm, 4 nm Results

| Retention Time | Area      | Area Percent |
|----------------|-----------|--------------|
| 14,16          | 115903165 | 49,856       |
| 20,77          | 116573469 | 50,144       |

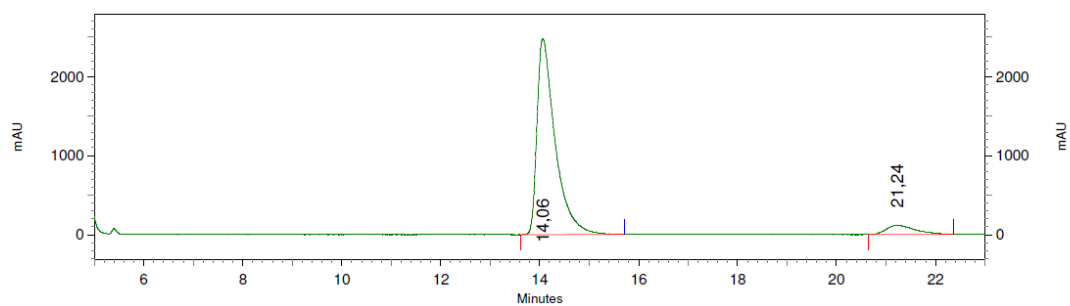

1: 230 nm, 4 nm Results

| Retention Time | Area      | Area Percent |
|----------------|-----------|--------------|
| 14,06          | 251590977 | 92,985       |
| 21,24          | 18980214  | 7,015        |

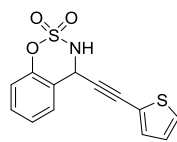

**3af**

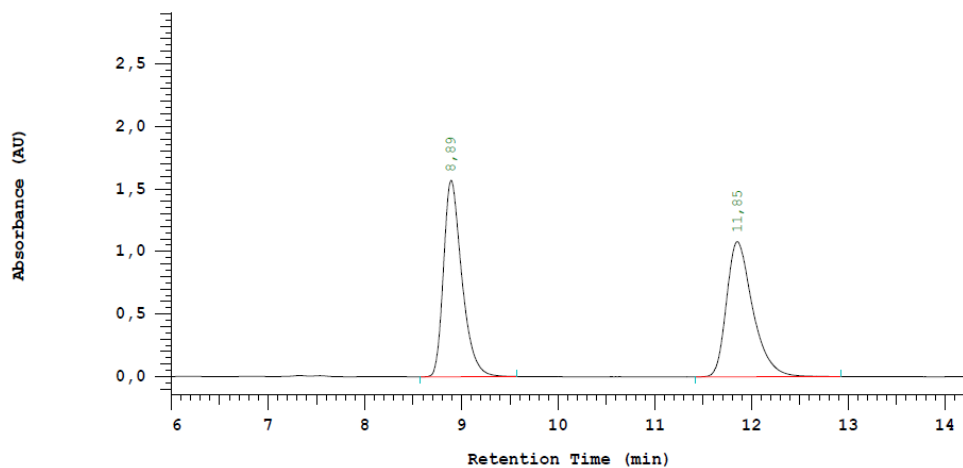

| No. | RT    | Area     | Area %  | Name |
|-----|-------|----------|---------|------|
| 1   | 8,89  | 10317951 | 50,370  |      |
| 2   | 11,85 | 10166531 | 49,630  |      |
|     |       | 20484482 | 100,000 |      |

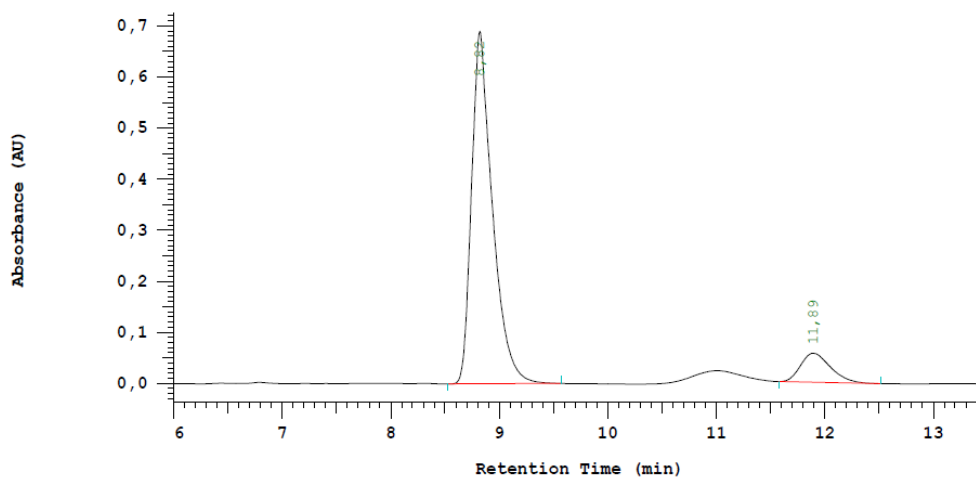

| No. | RT    | Area    | Area %  | Name |
|-----|-------|---------|---------|------|
| 1   | 8,82  | 4594979 | 89,390  |      |
| 2   | 11,89 | 545372  | 10,610  |      |
|     |       | 5140351 | 100,000 |      |

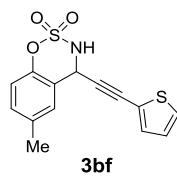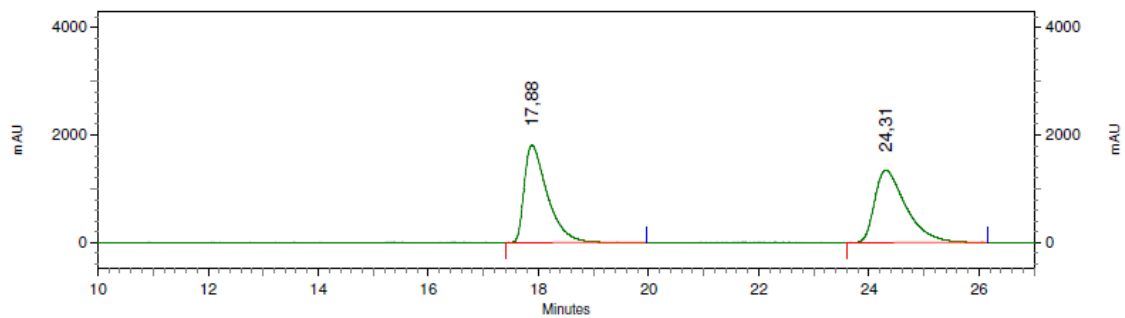

1: 280 nm, 4 nm Results

| Retention Time | Area      | Area Percent |
|----------------|-----------|--------------|
| 17,88          | 211198721 | 49,945       |
| 24,31          | 211666091 | 50,055       |

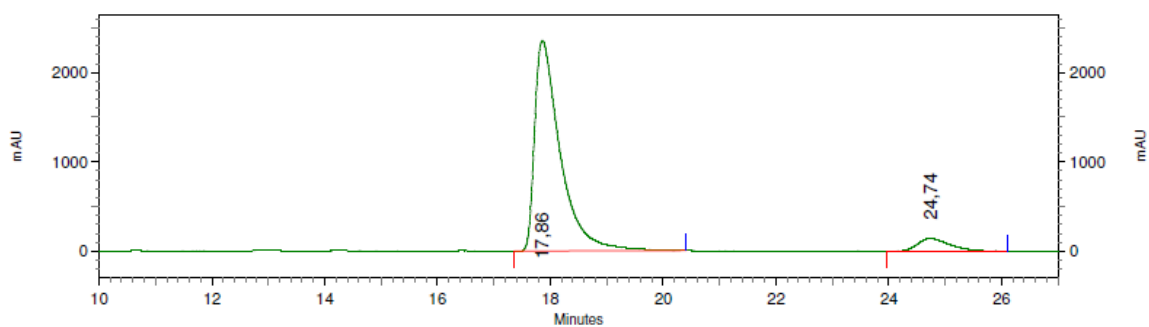

1: 280 nm, 4 nm Results

| Retention Time | Area      | Area Percent |
|----------------|-----------|--------------|
| 17,86          | 297758809 | 92,967       |
| 24,74          | 22524367  | 7,033        |

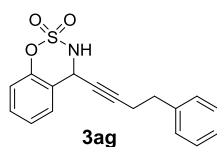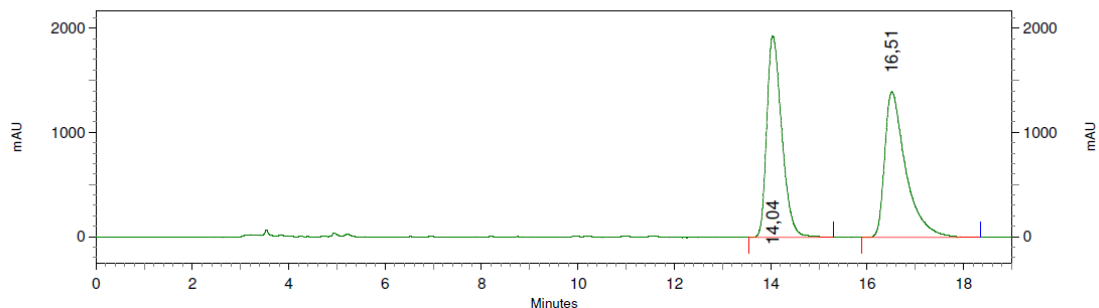

1: 216 nm, 4 nm Results

| Retention Time | Area      | Area Percent |
|----------------|-----------|--------------|
| 14,04          | 167753714 | 49,724       |
| 16,51          | 169618586 | 50,276       |

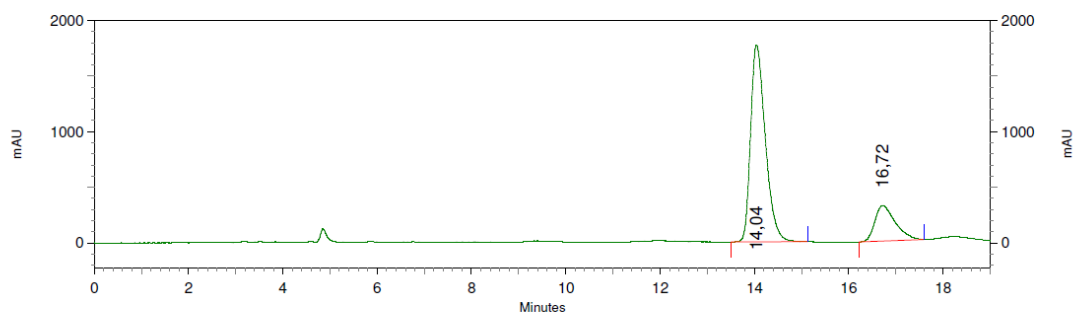

1: 216 nm, 4 nm Results

| Retention Time | Area      | Area Percent |
|----------------|-----------|--------------|
| 14,04          | 153461868 | 80,047       |
| 16,72          | 38251645  | 19,953       |

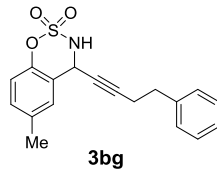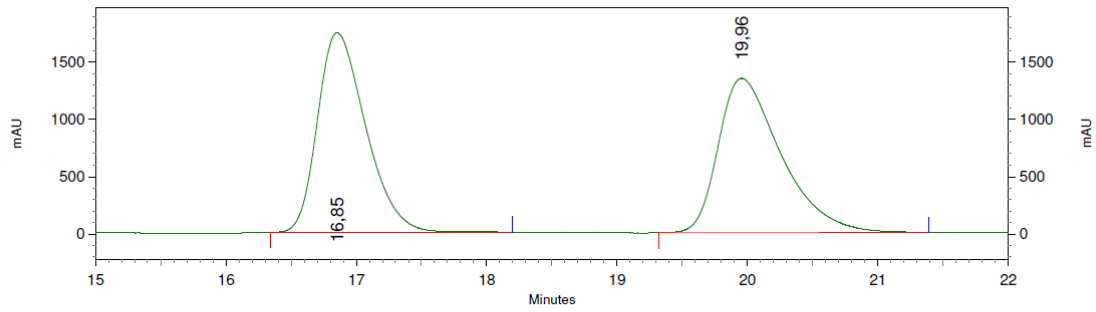

1: 216 nm, 4 nm Results

| Retention Time | Area      | Area Percent |
|----------------|-----------|--------------|
| 16,85          | 179124519 | 49,893       |
| 19,96          | 179891454 | 50,107       |

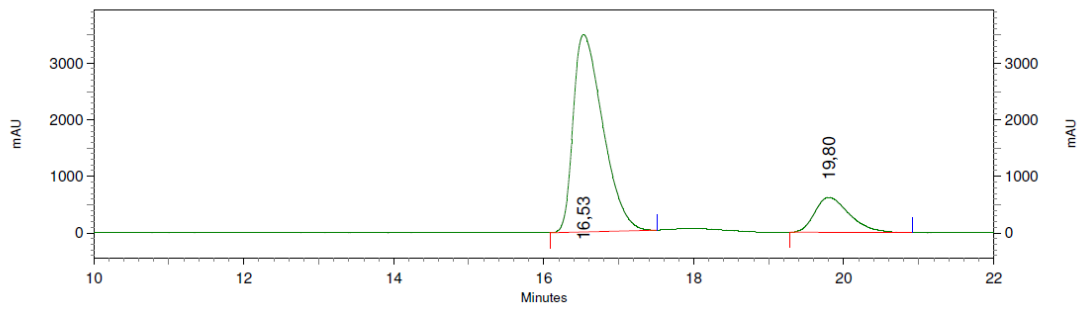

1: 216 nm, 4 nm Results

| Retention Time | Area      | Area Percent |
|----------------|-----------|--------------|
| 16,53          | 382511321 | 82,786       |
| 19,80          | 79538375  | 17,214       |

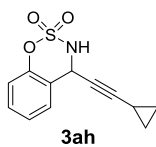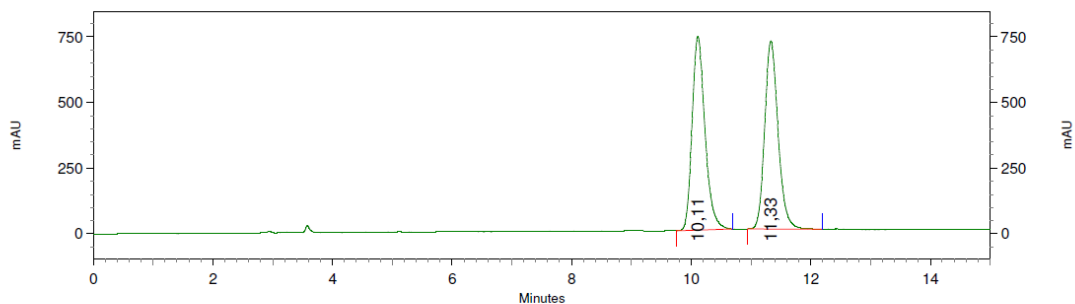

1: 210 nm, 4 nm Results

| Retention Time | Area     | Area Percent |
|----------------|----------|--------------|
| 10,11          | 44281803 | 49,845       |
| 11,33          | 44557963 | 50,155       |

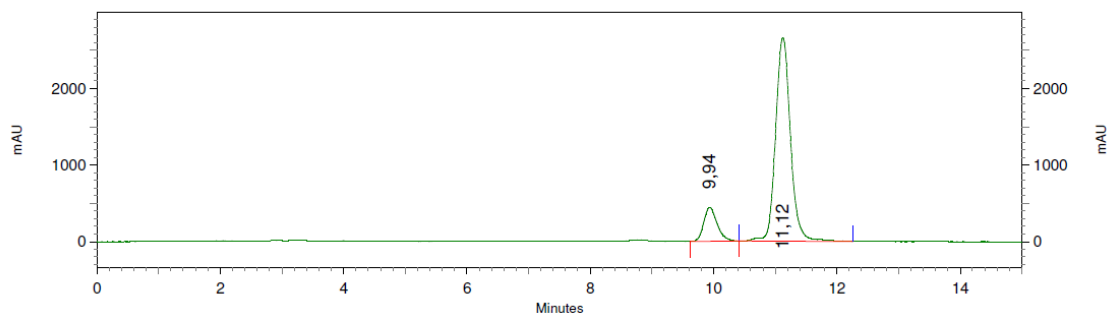

1: 216 nm, 4 nm Results

| Retention Time | Area      | Area Percent |
|----------------|-----------|--------------|
| 9,94           | 26545863  | 12,947       |
| 11,12          | 178482072 | 87,053       |

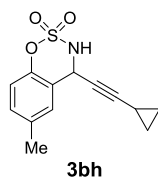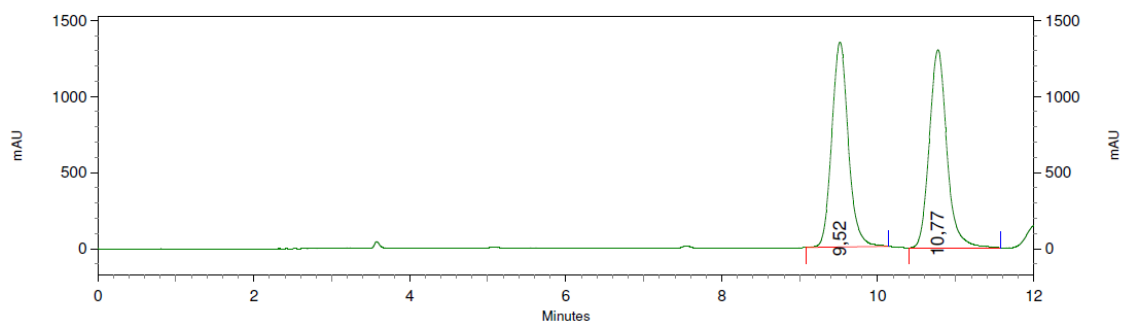

1: 225 nm, 4 nm Results

| Retention Time | Area     | Area Percent |
|----------------|----------|--------------|
| 9,52           | 79264482 | 49,408       |
| 10,77          | 81164208 | 50,592       |

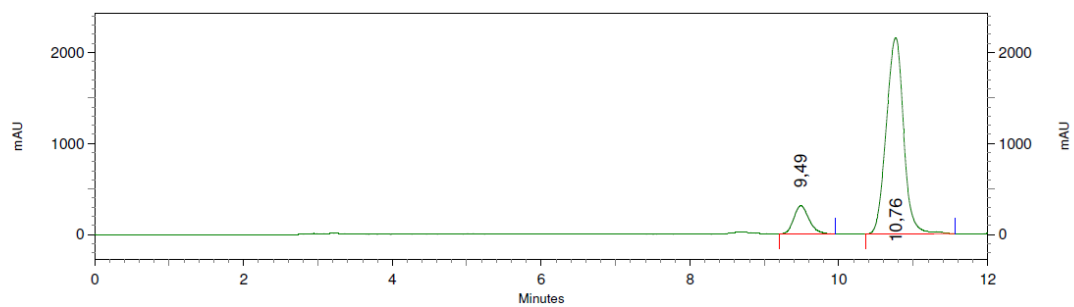

1: 225 nm, 4 nm Results

| Retention Time | Area      | Area Percent |
|----------------|-----------|--------------|
| 9,49           | 17444165  | 11,109       |
| 10,76          | 139588115 | 88,891       |



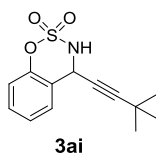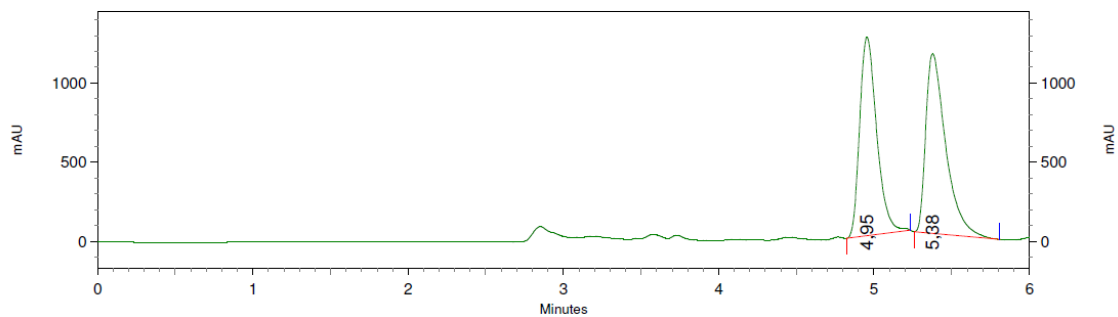

1: 224 nm, 4 nm Results

| Retention Time | Area     | Area Percent |
|----------------|----------|--------------|
| 4,95           | 38343084 | 48,526       |
| 5,38           | 40673134 | 51,474       |

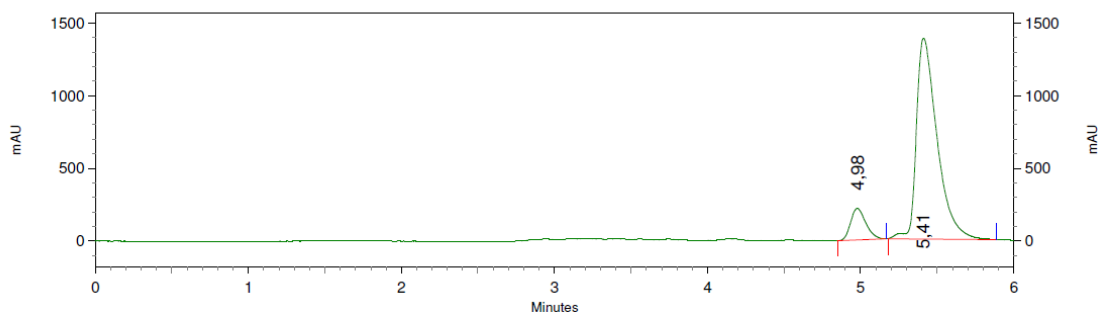

1: 224 nm, 4 nm Results

| Retention Time | Area     | Area Percent |
|----------------|----------|--------------|
| 4,98           | 6017924  | 10,383       |
| 5,41           | 51942094 | 89,617       |

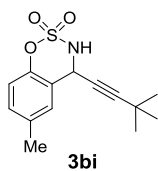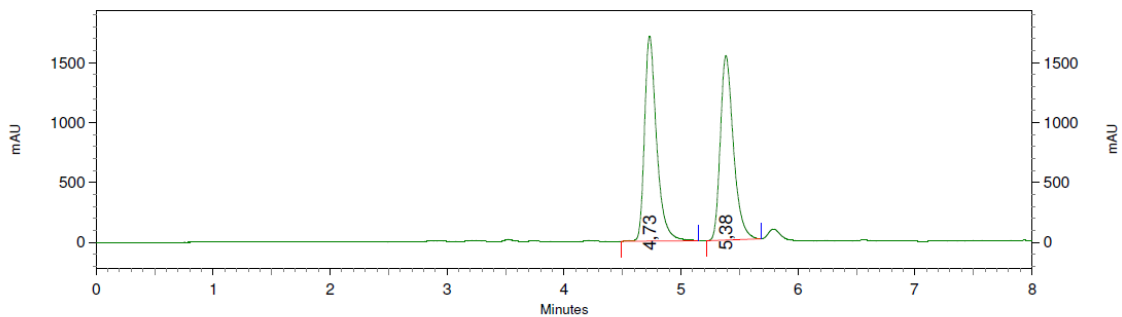

1: 216 nm, 4 nm Results

| Retention Time | Area     | Area Percent |
|----------------|----------|--------------|
| 4,73           | 49137817 | 50,557       |
| 5,38           | 48055880 | 49,443       |

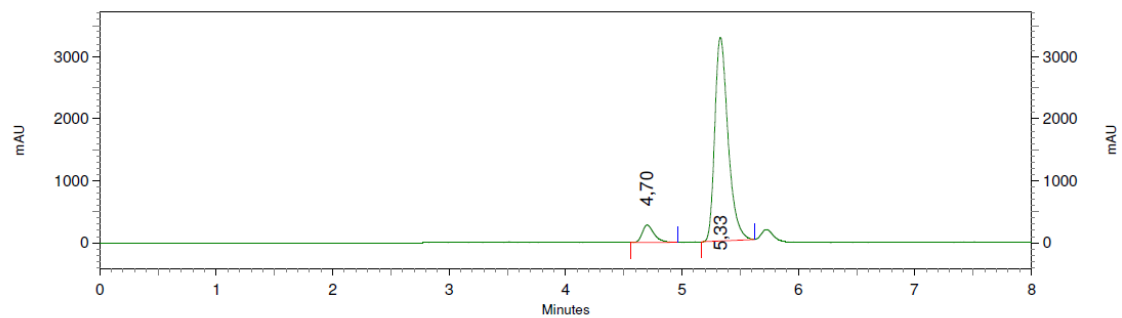

1: 216 nm, 4 nm Results

| Retention Time | Area      | Area Percent |
|----------------|-----------|--------------|
| 4,70           | 7927622   | 7,091        |
| 5,33           | 103873680 | 92,909       |

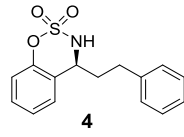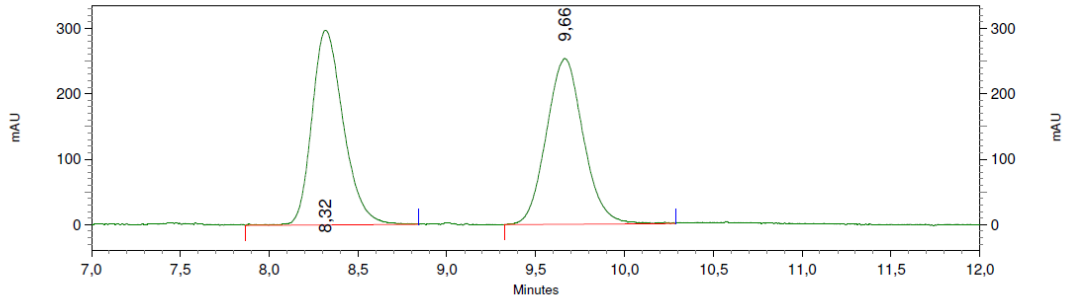

1: 267 nm, 4 nm Results

| Retention Time | Area     | Area Percent |
|----------------|----------|--------------|
| 8,32           | 14721455 | 49,997       |
| 9,66           | 14723077 | 50,003       |

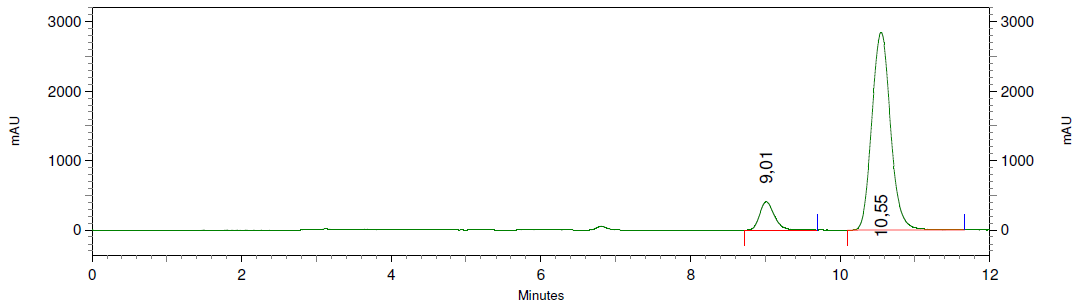

1: 217 nm, 4 nm Results

| Retention Time | Area      | Area Percent |
|----------------|-----------|--------------|
| 9,01           | 22348875  | 10,139       |
| 10,55          | 198079898 | 89,861       |

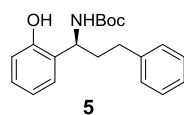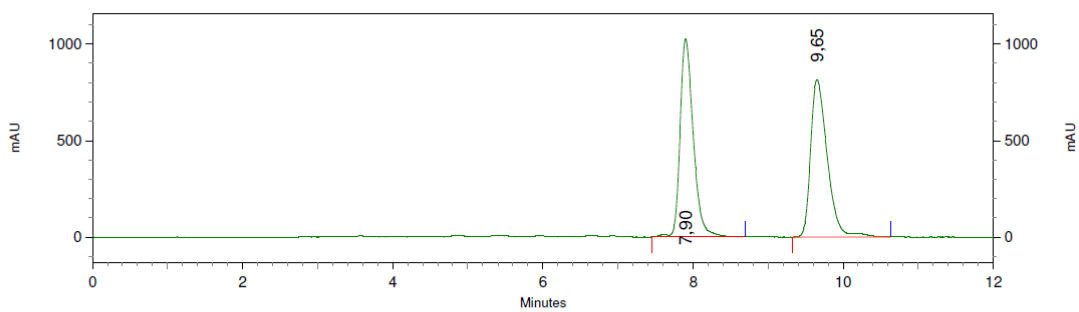

1: 224 nm, 4 nm Results

| Retention Time | Area     | Area Percent |
|----------------|----------|--------------|
| 7,90           | 50218319 | 50,033       |
| 9,65           | 50152175 | 49,967       |

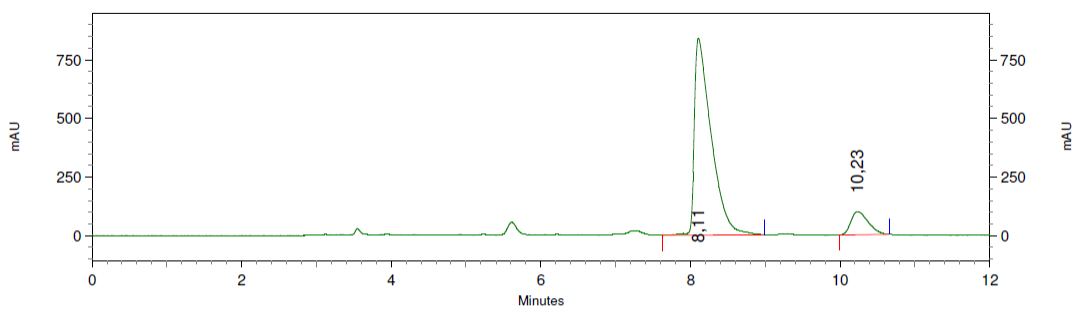

1: 256 nm, 4 nm Results

| Retention Time | Area     | Area Percent |
|----------------|----------|--------------|
| 8,11           | 52467108 | 89,218       |
| 10,23          | 6340453  | 10,782       |

### X-ray data for compound 3fd

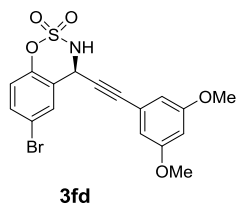

X-ray data for compound **3fd**: crystallized from CH<sub>2</sub>Cl<sub>2</sub>/n-hexane; C<sub>17</sub>H<sub>14</sub>BrNO<sub>5</sub>S; Mr= 424,26; orthorhombic; space group=P212121; a=10.47600(10), b=8.88300(10); c=18.1540(2) Å; V=1689.38(3) Å<sup>3</sup>; Z=4; ρ<sub>calcd</sub>=1.668 Mg m<sup>-3</sup>; μ=2.585 mm<sup>-1</sup>; F(000)=856. A colourless crystal of 0.06x0.08x0.08 mm<sup>3</sup> was used; 3868 [R(int)=0.0185] independent reflections were collected on a Enraf Nonius CCD diffractometer by using graphite-monochromated MoKα radiation (λ=0.71073 Å) operating at 50 kV and 30 mA. The structure was solved by direct methods and Fourier synthesis and refined by full matrix least-squares procedures on F<sup>2</sup> (SHELXL-97).<sup>3</sup> All non-hydrogen atoms were refined anisotropically. All hydrogen atoms were included in calculated positions and refined riding on the respective carbon atoms. The H1 and H1N atoms were located in a difference map and refined isotropically. Final R(ωR) values were R=0.0285 and ωR=0.0799. CCDC 1401764 contains the supplementary crystallographic data for this paper. These data can be obtained free of charge from The Cambridge Crystallographic Data Centre via [www.ccdc.cam.ac.uk/data\\_request/cif](http://www.ccdc.cam.ac.uk/data_request/cif).

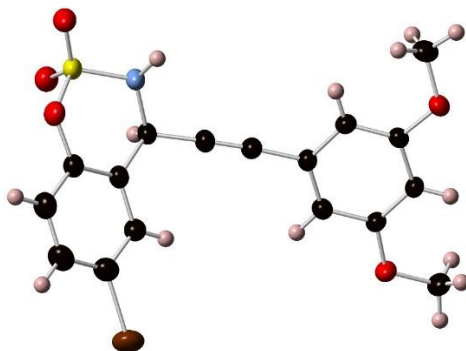

**Figure 1.** ORTEP plot for the X-ray structure of compound **3fd**.

## References

- <sup>1</sup> Luo, Y.; Carnell, A. J.; Lam, H. W. *Angew. Chem Int. Ed.* **2012**, 51, 6762.
- <sup>2</sup> Hepburn, H.B., Chotsaeng, N., Luo, Y., Lam, H.W., *Synthesis*, **2013**, 45, 2649-2661
- <sup>3</sup> G. M. Sheldrick, *Acta Cryst.* **2008**, A64, 112-122
